# Supplementary material for: Self-Transcendent Emotions and Their Social Effects: Awe, Elevation and Kama Muta Promote a Human Identification and Motivations to Help Others
Source: Front Psychol. 2021 Sep 13;12:709859. doi: 10.3389/fpsyg.2021.709859 (PMC8473748; doi:10.3389/fpsyg.2021.709859)
Supplement: Supplementary file 2 [file Table_2.XLSX]

## Sheet: AEK_main
ID	Cond	va	ve	vkm	NON	NOGOA	time_va_AFirst_Click	time_va_ALast_Click	time_va_APage_Submit	time_va_AClick_Count	AA1	AA2	AA3	AA4	AA5	AA6	AA7	AA8	AA9	AA10	AA11	AA12	AA13	AA14	AA15	AA16	AA17	AA18	AA19	AA20	AA21	AA22	AA23	EsAA1	EsAA2	EsAA3	IntAA1	IntAA2	IntAA3	IntAA4	time_VE_AFirst_Click	time_VE_ALast_Click	time_VE_APage_Submit	time_VE_AClick_Count	AE1	AE2	AE3	AE4	AE5
3	1	2	3	1	Gasteiz	1	0	0	218.83	0	2	2	2	2	2	2	2	6	2	3	3	2	2	3	3	3	3	4	2	5	2	2	3	3	3	3	3	5	4	5	0	0	267.584	0	7	1	7	7	7
5	1	2	1	3	Gasteiz	1	0	0	218.056	0	6	7	5	5	6	5	4	5	5	4	3	4	4	4	4	4	4	5	3	5	5	4	5	6	5	6	4	3	4	4	0	0	274.538	0	7	2	5	5	5
6	2	3	1	2	Gasteiz	1	-99	-99	-99	-99	-99	-99	-99	-99	-99	-99	-99	-99	-99	-99	-99	-99	-99	-99	-99	-99	-99	-99	-99	-99	-99	-99	-99	-99	-99	-99	-99	-99	-99	-99	-99	-99	-99	-99	-99	-99	-99	-99	-99
8	1	2	1	3	Gasteiz	1	0	0	142.933	0	2	5	3	3	3	3	3	3	3	3	3	2	1	3	2	3	3	3	1	1	4	6	3	3	3	3	2	5	5	5	0	0	257.868	0	4	4	6	5	5
9	3	2	1	3	Gasteiz	1	-99	-99	-99	-99	-99	-99	-99	-99	-99	-99	-99	-99	-99	-99	-99	-99	-99	-99	-99	-99	-99	-99	-99	-99	-99	-99	-99	-99	-99	-99	-99	-99	-99	-99	-99	-99	-99	-99	-99	-99	-99	-99	-99
11	3	1	2	3	Gasteiz	1	-99	-99	-99	-99	-99	-99	-99	-99	-99	-99	-99	-99	-99	-99	-99	-99	-99	-99	-99	-99	-99	-99	-99	-99	-99	-99	-99	-99	-99	-99	-99	-99	-99	-99	-99	-99	-99	-99	-99	-99	-99	-99	-99
13	2	3	2	1	Gasteiz	1	-99	-99	-99	-99	-99	-99	-99	-99	-99	-99	-99	-99	-99	-99	-99	-99	-99	-99	-99	-99	-99	-99	-99	-99	-99	-99	-99	-99	-99	-99	-99	-99	-99	-99	-99	-99	-99	-99	-99	-99	-99	-99	-99
15	3	1	3	2	Gasteiz	1	-99	-99	-99	-99	-99	-99	-99	-99	-99	-99	-99	-99	-99	-99	-99	-99	-99	-99	-99	-99	-99	-99	-99	-99	-99	-99	-99	-99	-99	-99	-99	-99	-99	-99	-99	-99	-99	-99	-99	-99	-99	-99	-99
17	3	1	2	3	Gasteiz	1	-99	-99	-99	-99	-99	-99	-99	-99	-99	-99	-99	-99	-99	-99	-99	-99	-99	-99	-99	-99	-99	-99	-99	-99	-99	-99	-99	-99	-99	-99	-99	-99	-99	-99	-99	-99	-99	-99	-99	-99	-99	-99	-99
18	3	1	3	2	Gasteiz	1	-99	-99	-99	-99	-99	-99	-99	-99	-99	-99	-99	-99	-99	-99	-99	-99	-99	-99	-99	-99	-99	-99	-99	-99	-99	-99	-99	-99	-99	-99	-99	-99	-99	-99	-99	-99	-99	-99	-99	-99	-99	-99	-99
19	2	3	1	2	Bilbo	1	-99	-99	-99	-99	-99	-99	-99	-99	-99	-99	-99	-99	-99	-99	-99	-99	-99	-99	-99	-99	-99	-99	-99	-99	-99	-99	-99	-99	-99	-99	-99	-99	-99	-99	-99	-99	-99	-99	-99	-99	-99	-99	-99
20	1	2	3	1	Gasteiz	1	0	0	229.526	0	5	5	3	3	1	3	3	3	3	3	1	2	2	2	2	3	2	2	2	2	3	3	3	3	5	5	3	5	4	4	0	0	270.472	0	5	2	4	5	4
21	1	2	3	1	Gasteiz	1	0	0	219.784	0	7	2	4	4	7	7	6	6	6	6	6	6	5	7	7	7	6	5	6	7	7	7	7	6	7	7	5	5	5	4	0	0	265.104	0	7	6	6	6	6
22	2	3	1	2	Gasteiz	1	-99	-99	-99	-99	-99	-99	-99	-99	-99	-99	-99	-99	-99	-99	-99	-99	-99	-99	-99	-99	-99	-99	-99	-99	-99	-99	-99	-99	-99	-99	-99	-99	-99	-99	-99	-99	-99	-99	-99	-99	-99	-99	-99
23	2	3	1	2	Gasteiz	1	-99	-99	-99	-99	-99	-99	-99	-99	-99	-99	-99	-99	-99	-99	-99	-99	-99	-99	-99	-99	-99	-99	-99	-99	-99	-99	-99	-99	-99	-99	-99	-99	-99	-99	-99	-99	-99	-99	-99	-99	-99	-99	-99
24	1	3	2	1	Gasteiz	1	0	0	213.62	0	2	2	2	2	2	2	2	2	1	1	1	1	1	1	1	1	1	1	1	1	1	1	1	3	3	3	2	3	3	2	0	0	270.378	0	5	1	4	5	4
25	2	3	2	1	Gasteiz	1	-99	-99	-99	-99	-99	-99	-99	-99	-99	-99	-99	-99	-99	-99	-99	-99	-99	-99	-99	-99	-99	-99	-99	-99	-99	-99	-99	-99	-99	-99	-99	-99	-99	-99	-99	-99	-99	-99	-99	-99	-99	-99	-99
26	3	1	3	2	Gasteiz	1	-99	-99	-99	-99	-99	-99	-99	-99	-99	-99	-99	-99	-99	-99	-99	-99	-99	-99	-99	-99	-99	-99	-99	-99	-99	-99	-99	-99	-99	-99	-99	-99	-99	-99	-99	-99	-99	-99	-99	-99	-99	-99	-99
27	1	3	1	2	Gasteiz	1	0	0	215.733	0	4	3	3	2	1	3	5	5	5	5	2	2	6	1	5	5	5	2	3	4	5	5	6	5	4	6	4	5	5	4	0	0	334.376	0	6	2	5	4	1
29	3	3	1	2	Gasteiz	1	-99	-99	-99	-99	-99	-99	-99	-99	-99	-99	-99	-99	-99	-99	-99	-99	-99	-99	-99	-99	-99	-99	-99	-99	-99	-99	-99	-99	-99	-99	-99	-99	-99	-99	-99	-99	-99	-99	-99	-99	-99	-99	-99
30	1	3	2	1	Gasteiz	1	0	0	218.657	0	3	5	4	3	3	3	3	3	3	2	2	2	2	3	3	2	2	3	2	2	3	2	3	4	4	4	4	4	4	4	0	0	271.348	0	6	2	6	6	5
31	1	2	1	3	Gasteiz	1	0	0	220.005	0	5	5	2	4	2	4	6	6	3	5	1	2	4	6	7	7	4	2	4	6	7	6	7	6	6	6	4	5	5	2	0	0	370.665	0	6	1	4	5	1
32	3	3	2	1	Gasteiz	1	-99	-99	-99	-99	-99	-99	-99	-99	-99	-99	-99	-99	-99	-99	-99	-99	-99	-99	-99	-99	-99	-99	-99	-99	-99	-99	-99	-99	-99	-99	-99	-99	-99	-99	-99	-99	-99	-99	-99	-99	-99	-99	-99
33	3	2	1	3	Gasteiz	1	-99	-99	-99	-99	-99	-99	-99	-99	-99	-99	-99	-99	-99	-99	-99	-99	-99	-99	-99	-99	-99	-99	-99	-99	-99	-99	-99	-99	-99	-99	-99	-99	-99	-99	-99	-99	-99	-99	-99	-99	-99	-99	-99
35	2	3	2	1	Gasteiz	1	-99	-99	-99	-99	-99	-99	-99	-99	-99	-99	-99	-99	-99	-99	-99	-99	-99	-99	-99	-99	-99	-99	-99	-99	-99	-99	-99	-99	-99	-99	-99	-99	-99	-99	-99	-99	-99	-99	-99	-99	-99	-99	-99
36	2	3	2	1	Gasteiz	1	-99	-99	-99	-99	-99	-99	-99	-99	-99	-99	-99	-99	-99	-99	-99	-99	-99	-99	-99	-99	-99	-99	-99	-99	-99	-99	-99	-99	-99	-99	-99	-99	-99	-99	-99	-99	-99	-99	-99	-99	-99	-99	-99
37	3	2	1	3	Gasteiz	1	-99	-99	-99	-99	-99	-99	-99	-99	-99	-99	-99	-99	-99	-99	-99	-99	-99	-99	-99	-99	-99	-99	-99	-99	-99	-99	-99	-99	-99	-99	-99	-99	-99	-99	-99	-99	-99	-99	-99	-99	-99	-99	-99
38	3	2	1	3	Gasteiz	1	-99	-99	-99	-99	-99	-99	-99	-99	-99	-99	-99	-99	-99	-99	-99	-99	-99	-99	-99	-99	-99	-99	-99	-99	-99	-99	-99	-99	-99	-99	-99	-99	-99	-99	-99	-99	-99	-99	-99	-99	-99	-99	-99
39	2	3	1	2	Gasteiz	1	-99	-99	-99	-99	-99	-99	-99	-99	-99	-99	-99	-99	-99	-99	-99	-99	-99	-99	-99	-99	-99	-99	-99	-99	-99	-99	-99	-99	-99	-99	-99	-99	-99	-99	-99	-99	-99	-99	-99	-99	-99	-99	-99
40	1	1	3	2	Gasteiz	1	0	0	258.733	0	1	1	1	1	1	1	1	1	1	2	1	1	3	2	2	1	1	1	1	1	2	3	3	3	3	4	2	2	1	1	0	0	284.219	0	3	4	3	3	4
41	2	2	1	3	Gasteiz	1	-99	-99	-99	-99	-99	-99	-99	-99	-99	-99	-99	-99	-99	-99	-99	-99	-99	-99	-99	-99	-99	-99	-99	-99	-99	-99	-99	-99	-99	-99	-99	-99	-99	-99	-99	-99	-99	-99	-99	-99	-99	-99	-99
42	1	3	1	2	Gasteiz	1	246.031	246.031	246.927	1	5	2	4	5	4	5	5	5	5	5	5	4	3	4	5	5	4	3	4	5	6	5	6	5	5	5	4	3	4	4	0	0	281.183	0	6	4	6	6	4
43	3	2	1	3	Gasteiz	1	-99	-99	-99	-99	-99	-99	-99	-99	-99	-99	-99	-99	-99	-99	-99	-99	-99	-99	-99	-99	-99	-99	-99	-99	-99	-99	-99	-99	-99	-99	-99	-99	-99	-99	-99	-99	-99	-99	-99	-99	-99	-99	-99
44	3	3	2	1	Bilbo	1	-99	-99	-99	-99	-99	-99	-99	-99	-99	-99	-99	-99	-99	-99	-99	-99	-99	-99	-99	-99	-99	-99	-99	-99	-99	-99	-99	-99	-99	-99	-99	-99	-99	-99	-99	-99	-99	-99	-99	-99	-99	-99	-99
45	1	3	1	2	Gasteiz	1	0	0	215.173	0	4	3	3	3	3	3	4	2	5	6	5	5	5	5	4	6	6	2	6	5	5	7	7	6	4	6	2	3	4	4	0	0	347.474	0	3	4	2	3	3
46	2	2	3	1	Gasteiz	1	-99	-99	-99	-99	-99	-99	-99	-99	-99	-99	-99	-99	-99	-99	-99	-99	-99	-99	-99	-99	-99	-99	-99	-99	-99	-99	-99	-99	-99	-99	-99	-99	-99	-99	-99	-99	-99	-99	-99	-99	-99	-99	-99
47	3	1	3	2	Bilbo	1	-99	-99	-99	-99	-99	-99	-99	-99	-99	-99	-99	-99	-99	-99	-99	-99	-99	-99	-99	-99	-99	-99	-99	-99	-99	-99	-99	-99	-99	-99	-99	-99	-99	-99	-99	-99	-99	-99	-99	-99	-99	-99	-99
48	3	1	2	3	Gasteiz	1	-99	-99	-99	-99	-99	-99	-99	-99	-99	-99	-99	-99	-99	-99	-99	-99	-99	-99	-99	-99	-99	-99	-99	-99	-99	-99	-99	-99	-99	-99	-99	-99	-99	-99	-99	-99	-99	-99	-99	-99	-99	-99	-99
49	3	2	3	1	Gasteiz	1	-99	-99	-99	-99	-99	-99	-99	-99	-99	-99	-99	-99	-99	-99	-99	-99	-99	-99	-99	-99	-99	-99	-99	-99	-99	-99	-99	-99	-99	-99	-99	-99	-99	-99	-99	-99	-99	-99	-99	-99	-99	-99	-99
50	3	3	1	2	Bilbo	1	-99	-99	-99	-99	-99	-99	-99	-99	-99	-99	-99	-99	-99	-99	-99	-99	-99	-99	-99	-99	-99	-99	-99	-99	-99	-99	-99	-99	-99	-99	-99	-99	-99	-99	-99	-99	-99	-99	-99	-99	-99	-99	-99
57	1	1	3	2	Gasteiz	1	0	0	217.787	0	4	5	2	2	1	2	1	1	1	2	1	1	1	2	2	2	1	1	1	1	1	2	2	3	3	5	4	4	3	4	0	0	270.272	0	4	4	5	6	3
61	1	1	3	2	Gasteiz	1	0	0	230.905	0	6	5	4	5	3	4	5	5	5	5	3	5	3	6	4	5	5	6	5	6	6	4	6	5	6	6	2	5	4	4	0	0	273.86	0	5	5	5	5	4
64	1	3	1	2	Gasteiz	1	0	0	217.284	0	2	1	1	1	1	1	1	1	1	1	1	1	1	4	2	2	1	1	1	1	2	5	7	3	2	3	4	5	4	4	0	0	271.521	0	4	3	3	4	2
66	2	2	3	1	Gasteiz	1	-99	-99	-99	-99	-99	-99	-99	-99	-99	-99	-99	-99	-99	-99	-99	-99	-99	-99	-99	-99	-99	-99	-99	-99	-99	-99	-99	-99	-99	-99	-99	-99	-99	-99	-99	-99	-99	-99	-99	-99	-99	-99	-99
67	2	2	3	1	Gasteiz	1	-99	-99	-99	-99	-99	-99	-99	-99	-99	-99	-99	-99	-99	-99	-99	-99	-99	-99	-99	-99	-99	-99	-99	-99	-99	-99	-99	-99	-99	-99	-99	-99	-99	-99	-99	-99	-99	-99	-99	-99	-99	-99	-99
70	3	3	2	1	Gasteiz	1	-99	-99	-99	-99	-99	-99	-99	-99	-99	-99	-99	-99	-99	-99	-99	-99	-99	-99	-99	-99	-99	-99	-99	-99	-99	-99	-99	-99	-99	-99	-99	-99	-99	-99	-99	-99	-99	-99	-99	-99	-99	-99	-99
71	2	1	2	3	Gasteiz	1	-99	-99	-99	-99	-99	-99	-99	-99	-99	-99	-99	-99	-99	-99	-99	-99	-99	-99	-99	-99	-99	-99	-99	-99	-99	-99	-99	-99	-99	-99	-99	-99	-99	-99	-99	-99	-99	-99	-99	-99	-99	-99	-99
72	2	1	2	3	Gasteiz	1	-99	-99	-99	-99	-99	-99	-99	-99	-99	-99	-99	-99	-99	-99	-99	-99	-99	-99	-99	-99	-99	-99	-99	-99	-99	-99	-99	-99	-99	-99	-99	-99	-99	-99	-99	-99	-99	-99	-99	-99	-99	-99	-99
75	2	2	1	3	Gasteiz	1	-99	-99	-99	-99	-99	-99	-99	-99	-99	-99	-99	-99	-99	-99	-99	-99	-99	-99	-99	-99	-99	-99	-99	-99	-99	-99	-99	-99	-99	-99	-99	-99	-99	-99	-99	-99	-99	-99	-99	-99	-99	-99	-99
77	1	1	2	3	Gasteiz	1	0	0	254.842	0	4	6	4	1	1	5	5	5	4	3	2	4	2	7	7	6	6	6	6	6	6	6	7	4	3	4	3	2	4	4	0	0	270.621	0	6	6	5	5	4
78	2	2	1	3	Gasteiz	1	-99	-99	-99	-99	-99	-99	-99	-99	-99	-99	-99	-99	-99	-99	-99	-99	-99	-99	-99	-99	-99	-99	-99	-99	-99	-99	-99	-99	-99	-99	-99	-99	-99	-99	-99	-99	-99	-99	-99	-99	-99	-99	-99
80	3	2	1	3	Gasteiz	1	-99	-99	-99	-99	-99	-99	-99	-99	-99	-99	-99	-99	-99	-99	-99	-99	-99	-99	-99	-99	-99	-99	-99	-99	-99	-99	-99	-99	-99	-99	-99	-99	-99	-99	-99	-99	-99	-99	-99	-99	-99	-99	-99
81	3	1	2	3	Gasteiz	1	-99	-99	-99	-99	-99	-99	-99	-99	-99	-99	-99	-99	-99	-99	-99	-99	-99	-99	-99	-99	-99	-99	-99	-99	-99	-99	-99	-99	-99	-99	-99	-99	-99	-99	-99	-99	-99	-99	-99	-99	-99	-99	-99
83	1	1	3	2	Gasteiz	1	0	0	258.506	0	5	4	3	4	3	3	3	3	4	5	3	4	5	4	5	5	6	2	4	5	5	6	6	5	6	6	4	5	5	4	0	0	270.213	0	5	3	5	5	4
84	3	3	1	2	Gasteiz	1	-99	-99	-99	-99	-99	-99	-99	-99	-99	-99	-99	-99	-99	-99	-99	-99	-99	-99	-99	-99	-99	-99	-99	-99	-99	-99	-99	-99	-99	-99	-99	-99	-99	-99	-99	-99	-99	-99	-99	-99	-99	-99	-99
85	2	1	2	3	Gasteiz	1	-99	-99	-99	-99	-99	-99	-99	-99	-99	-99	-99	-99	-99	-99	-99	-99	-99	-99	-99	-99	-99	-99	-99	-99	-99	-99	-99	-99	-99	-99	-99	-99	-99	-99	-99	-99	-99	-99	-99	-99	-99	-99	-99
86	2	2	3	1	Gasteiz	1	-99	-99	-99	-99	-99	-99	-99	-99	-99	-99	-99	-99	-99	-99	-99	-99	-99	-99	-99	-99	-99	-99	-99	-99	-99	-99	-99	-99	-99	-99	-99	-99	-99	-99	-99	-99	-99	-99	-99	-99	-99	-99	-99
88	3	2	3	1	Gasteiz	1	-99	-99	-99	-99	-99	-99	-99	-99	-99	-99	-99	-99	-99	-99	-99	-99	-99	-99	-99	-99	-99	-99	-99	-99	-99	-99	-99	-99	-99	-99	-99	-99	-99	-99	-99	-99	-99	-99	-99	-99	-99	-99	-99
89	3	3	2	1	Gasteiz	1	-99	-99	-99	-99	-99	-99	-99	-99	-99	-99	-99	-99	-99	-99	-99	-99	-99	-99	-99	-99	-99	-99	-99	-99	-99	-99	-99	-99	-99	-99	-99	-99	-99	-99	-99	-99	-99	-99	-99	-99	-99	-99	-99
96	1	1	2	3	Gasteiz	1	0	0	219.821	0	5	4	1	1	1	1	1	1	1	2	1	1	1	1	1	1	1	1	1	1	1	1	1	1	1	1	2	4	3	2	0	0	268.969	0	2	1	2	2	1
97	2	2	1	3	Gasteiz	1	-99	-99	-99	-99	-99	-99	-99	-99	-99	-99	-99	-99	-99	-99	-99	-99	-99	-99	-99	-99	-99	-99	-99	-99	-99	-99	-99	-99	-99	-99	-99	-99	-99	-99	-99	-99	-99	-99	-99	-99	-99	-99	-99
98	2	3	2	1	Gasteiz	1	-99	-99	-99	-99	-99	-99	-99	-99	-99	-99	-99	-99	-99	-99	-99	-99	-99	-99	-99	-99	-99	-99	-99	-99	-99	-99	-99	-99	-99	-99	-99	-99	-99	-99	-99	-99	-99	-99	-99	-99	-99	-99	-99
99	3	3	2	1	Gasteiz	1	-99	-99	-99	-99	-99	-99	-99	-99	-99	-99	-99	-99	-99	-99	-99	-99	-99	-99	-99	-99	-99	-99	-99	-99	-99	-99	-99	-99	-99	-99	-99	-99	-99	-99	-99	-99	-99	-99	-99	-99	-99	-99	-99
100	1	1	2	3	Gasteiz	1	0	0	222.133	0	2	4	2	2	1	1	1	1	3	4	1	1	1	2	5	3	3	2	2	2	2	3	3	5	1	3	3	4	4	3	0	0	275.876	0	7	1	5	7	3
101	3	3	1	2	Gasteiz	1	-99	-99	-99	-99	-99	-99	-99	-99	-99	-99	-99	-99	-99	-99	-99	-99	-99	-99	-99	-99	-99	-99	-99	-99	-99	-99	-99	-99	-99	-99	-99	-99	-99	-99	-99	-99	-99	-99	-99	-99	-99	-99	-99
103	1	3	2	1	Gasteiz	1	0	0	217.609	0	5	6	5	4	2	4	5	6	5	5	4	4	1	4	5	5	4	4	4	5	5	5	6	4	6	6	2	4	4	4	0	0	269.303	0	5	6	4	5	5
104	3	2	1	3	Gasteiz	1	-99	-99	-99	-99	-99	-99	-99	-99	-99	-99	-99	-99	-99	-99	-99	-99	-99	-99	-99	-99	-99	-99	-99	-99	-99	-99	-99	-99	-99	-99	-99	-99	-99	-99	-99	-99	-99	-99	-99	-99	-99	-99	-99
105	1	3	2	1	Gasteiz	1	0	0	223.866	0	7	2	6	3	3	7	7	7	7	3	5	7	7	7	2	5	7	7	5	6	7	5	7	2	2	2	2	3	3	5	0	0	273.38	0	7	1	7	7	7
106	3	3	1	2	Gasteiz	1	-99	-99	-99	-99	-99	-99	-99	-99	-99	-99	-99	-99	-99	-99	-99	-99	-99	-99	-99	-99	-99	-99	-99	-99	-99	-99	-99	-99	-99	-99	-99	-99	-99	-99	-99	-99	-99	-99	-99	-99	-99	-99	-99
109	3	2	1	3	Gasteiz	1	-99	-99	-99	-99	-99	-99	-99	-99	-99	-99	-99	-99	-99	-99	-99	-99	-99	-99	-99	-99	-99	-99	-99	-99	-99	-99	-99	-99	-99	-99	-99	-99	-99	-99	-99	-99	-99	-99	-99	-99	-99	-99	-99
110	3	3	1	2	Gasteiz	1	-99	-99	-99	-99	-99	-99	-99	-99	-99	-99	-99	-99	-99	-99	-99	-99	-99	-99	-99	-99	-99	-99	-99	-99	-99	-99	-99	-99	-99	-99	-99	-99	-99	-99	-99	-99	-99	-99	-99	-99	-99	-99	-99
113	1	3	1	2	Gasteiz	1	0	0	218.761	0	4	3	5	5	5	5	5	5	4	5	3	5	3	5	4	4	4	4	5	5	5	5	5	5	5	5	4	3	3	3	0	0	273.181	0	5	3	3	3	4
114	3	3	1	2	Gasteiz	1	-99	-99	-99	-99	-99	-99	-99	-99	-99	-99	-99	-99	-99	-99	-99	-99	-99	-99	-99	-99	-99	-99	-99	-99	-99	-99	-99	-99	-99	-99	-99	-99	-99	-99	-99	-99	-99	-99	-99	-99	-99	-99	-99
116	1	1	3	2	Gasteiz	1	0	0	220.301	0	6	5	5	5	3	4	5	5	4	5	2	5	4	2	5	5	5	7	7	4	6	6	6	6	7	7	3	3	5	5	0	0	269.472	0	6	1	5	5	6
117	2	1	3	2	Gasteiz	1	-99	-99	-99	-99	-99	-99	-99	-99	-99	-99	-99	-99	-99	-99	-99	-99	-99	-99	-99	-99	-99	-99	-99	-99	-99	-99	-99	-99	-99	-99	-99	-99	-99	-99	-99	-99	-99	-99	-99	-99	-99	-99	-99
119	2	3	1	2	Gasteiz	1	-99	-99	-99	-99	-99	-99	-99	-99	-99	-99	-99	-99	-99	-99	-99	-99	-99	-99	-99	-99	-99	-99	-99	-99	-99	-99	-99	-99	-99	-99	-99	-99	-99	-99	-99	-99	-99	-99	-99	-99	-99	-99	-99
120	2	1	2	3	Gasteiz	1	-99	-99	-99	-99	-99	-99	-99	-99	-99	-99	-99	-99	-99	-99	-99	-99	-99	-99	-99	-99	-99	-99	-99	-99	-99	-99	-99	-99	-99	-99	-99	-99	-99	-99	-99	-99	-99	-99	-99	-99	-99	-99	-99
121	1	3	2	1	Gasteiz	1	0	0	224.469	0	5	3	3	4	3	3	4	4	4	4	2	3	2	5	4	4	3	2	3	5	4	4	6	5	4	5	3	2	3	3	0	0	272.249	0	5	2	5	4	4
122	3	1	2	3	Gasteiz	1	-99	-99	-99	-99	-99	-99	-99	-99	-99	-99	-99	-99	-99	-99	-99	-99	-99	-99	-99	-99	-99	-99	-99	-99	-99	-99	-99	-99	-99	-99	-99	-99	-99	-99	-99	-99	-99	-99	-99	-99	-99	-99	-99
131	2	2	1	3	Quito	2	-99	-99	-99	-99	-99	-99	-99	-99	-99	-99	-99	-99	-99	-99	-99	-99	-99	-99	-99	-99	-99	-99	-99	-99	-99	-99	-99	-99	-99	-99	-99	-99	-99	-99	-99	-99	-99	-99	-99	-99	-99	-99	-99
135	2	3	1	2	Quito	2	-99	-99	-99	-99	-99	-99	-99	-99	-99	-99	-99	-99	-99	-99	-99	-99	-99	-99	-99	-99	-99	-99	-99	-99	-99	-99	-99	-99	-99	-99	-99	-99	-99	-99	-99	-99	-99	-99	-99	-99	-99	-99	-99
138	3	3	1	2	Quito	2	-99	-99	-99	-99	-99	-99	-99	-99	-99	-99	-99	-99	-99	-99	-99	-99	-99	-99	-99	-99	-99	-99	-99	-99	-99	-99	-99	-99	-99	-99	-99	-99	-99	-99	-99	-99	-99	-99	-99	-99	-99	-99	-99
140	1	3	1	2	Quito	2	0	0	218.374	0	1	2	2	3	2	2	1	1	2	2	3	2	2	1	2	2	3	2	1	2	2	3	2	1	1	1	1	3	5	3	339.708	339.708	340.007	1	4	1	4	4	4
142	2	3	2	1	Quito	2	-99	-99	-99	-99	-99	-99	-99	-99	-99	-99	-99	-99	-99	-99	-99	-99	-99	-99	-99	-99	-99	-99	-99	-99	-99	-99	-99	-99	-99	-99	-99	-99	-99	-99	-99	-99	-99	-99	-99	-99	-99	-99	-99
144	3	1	3	2	Quito	2	-99	-99	-99	-99	-99	-99	-99	-99	-99	-99	-99	-99	-99	-99	-99	-99	-99	-99	-99	-99	-99	-99	-99	-99	-99	-99	-99	-99	-99	-99	-99	-99	-99	-99	-99	-99	-99	-99	-99	-99	-99	-99	-99
145	3	2	3	1	Quito	2	-99	-99	-99	-99	-99	-99	-99	-99	-99	-99	-99	-99	-99	-99	-99	-99	-99	-99	-99	-99	-99	-99	-99	-99	-99	-99	-99	-99	-99	-99	-99	-99	-99	-99	-99	-99	-99	-99	-99	-99	-99	-99	-99
146	1	1	2	3	Quito	2	0	0	228.151	0	6	4	3	3	3	4	4	4	4	5	4	4	3	2	2	2	2	2	2	2	4	5	6	5	6	5	1	3	3	3	0	0	267.849	0	6	3	6	6	6
149	1	2	1	3	Quito	2	222.463	222.463	223.924	1	4	2	4	4	1	3	3	3	4	3	1	1	1	1	1	3	3	2	1	2	2	3	4	4	3	4	3	5	5	3	0	0	304.739	0	7	5	7	7	1
152	3	3	2	1	Quito	2	-99	-99	-99	-99	-99	-99	-99	-99	-99	-99	-99	-99	-99	-99	-99	-99	-99	-99	-99	-99	-99	-99	-99	-99	-99	-99	-99	-99	-99	-99	-99	-99	-99	-99	-99	-99	-99	-99	-99	-99	-99	-99	-99
153	1	1	2	3	Quito	2	0	0	221.271	0	6	1	1	2	1	3	7	7	1	1	1	4	1	1	1	2	6	5	3	7	7	1	1	1	1	1	1	2	1	1	0	0	299.468	0	3	3	2	2	1
155	2	1	2	3	Quito	2	-99	-99	-99	-99	-99	-99	-99	-99	-99	-99	-99	-99	-99	-99	-99	-99	-99	-99	-99	-99	-99	-99	-99	-99	-99	-99	-99	-99	-99	-99	-99	-99	-99	-99	-99	-99	-99	-99	-99	-99	-99	-99	-99
156	3	1	2	3	Quito	2	-99	-99	-99	-99	-99	-99	-99	-99	-99	-99	-99	-99	-99	-99	-99	-99	-99	-99	-99	-99	-99	-99	-99	-99	-99	-99	-99	-99	-99	-99	-99	-99	-99	-99	-99	-99	-99	-99	-99	-99	-99	-99	-99
157	2	1	3	2	Quito	2	-99	-99	-99	-99	-99	-99	-99	-99	-99	-99	-99	-99	-99	-99	-99	-99	-99	-99	-99	-99	-99	-99	-99	-99	-99	-99	-99	-99	-99	-99	-99	-99	-99	-99	-99	-99	-99	-99	-99	-99	-99	-99	-99
158	2	2	3	1	Quito	2	-99	-99	-99	-99	-99	-99	-99	-99	-99	-99	-99	-99	-99	-99	-99	-99	-99	-99	-99	-99	-99	-99	-99	-99	-99	-99	-99	-99	-99	-99	-99	-99	-99	-99	-99	-99	-99	-99	-99	-99	-99	-99	-99
159	3	1	3	2	Quito	2	-99	-99	-99	-99	-99	-99	-99	-99	-99	-99	-99	-99	-99	-99	-99	-99	-99	-99	-99	-99	-99	-99	-99	-99	-99	-99	-99	-99	-99	-99	-99	-99	-99	-99	-99	-99	-99	-99	-99	-99	-99	-99	-99
161	3	1	3	2	Quito	2	-99	-99	-99	-99	-99	-99	-99	-99	-99	-99	-99	-99	-99	-99	-99	-99	-99	-99	-99	-99	-99	-99	-99	-99	-99	-99	-99	-99	-99	-99	-99	-99	-99	-99	-99	-99	-99	-99	-99	-99	-99	-99	-99
162	3	1	3	2	Quito	2	-99	-99	-99	-99	-99	-99	-99	-99	-99	-99	-99	-99	-99	-99	-99	-99	-99	-99	-99	-99	-99	-99	-99	-99	-99	-99	-99	-99	-99	-99	-99	-99	-99	-99	-99	-99	-99	-99	-99	-99	-99	-99	-99
163	2	1	3	2	Quito	2	-99	-99	-99	-99	-99	-99	-99	-99	-99	-99	-99	-99	-99	-99	-99	-99	-99	-99	-99	-99	-99	-99	-99	-99	-99	-99	-99	-99	-99	-99	-99	-99	-99	-99	-99	-99	-99	-99	-99	-99	-99	-99	-99
164	2	2	3	1	Quito	2	-99	-99	-99	-99	-99	-99	-99	-99	-99	-99	-99	-99	-99	-99	-99	-99	-99	-99	-99	-99	-99	-99	-99	-99	-99	-99	-99	-99	-99	-99	-99	-99	-99	-99	-99	-99	-99	-99	-99	-99	-99	-99	-99
165	2	2	3	1	Quito	2	-99	-99	-99	-99	-99	-99	-99	-99	-99	-99	-99	-99	-99	-99	-99	-99	-99	-99	-99	-99	-99	-99	-99	-99	-99	-99	-99	-99	-99	-99	-99	-99	-99	-99	-99	-99	-99	-99	-99	-99	-99	-99	-99
168	2	3	2	1	Quito	2	-99	-99	-99	-99	-99	-99	-99	-99	-99	-99	-99	-99	-99	-99	-99	-99	-99	-99	-99	-99	-99	-99	-99	-99	-99	-99	-99	-99	-99	-99	-99	-99	-99	-99	-99	-99	-99	-99	-99	-99	-99	-99	-99
173	3	2	3	1	Quito	2	-99	-99	-99	-99	-99	-99	-99	-99	-99	-99	-99	-99	-99	-99	-99	-99	-99	-99	-99	-99	-99	-99	-99	-99	-99	-99	-99	-99	-99	-99	-99	-99	-99	-99	-99	-99	-99	-99	-99	-99	-99	-99	-99
176	1	2	1	3	Quito	2	0	0	222.547	0	4	1	4	3	2	4	4	4	4	3	3	3	2	5	5	4	3	3	2	2	3	3	5	5	4	4	3	3	3	4	0	0	273.606	0	5	2	5	5	1
179	3	3	1	2	Quito	2	-99	-99	-99	-99	-99	-99	-99	-99	-99	-99	-99	-99	-99	-99	-99	-99	-99	-99	-99	-99	-99	-99	-99	-99	-99	-99	-99	-99	-99	-99	-99	-99	-99	-99	-99	-99	-99	-99	-99	-99	-99	-99	-99
180	1	1	2	3	Quito	2	4.943	4.943	20.985	1	5	6	6	6	7	7	7	7	7	7	4	4	2	7	6	6	6	2	3	4	7	4	6	7	4	7	2	2	2	3	0	0	126.116	0	6	6	4	7	5
182	3	1	3	2	Quito	2	-99	-99	-99	-99	-99	-99	-99	-99	-99	-99	-99	-99	-99	-99	-99	-99	-99	-99	-99	-99	-99	-99	-99	-99	-99	-99	-99	-99	-99	-99	-99	-99	-99	-99	-99	-99	-99	-99	-99	-99	-99	-99	-99
183	3	2	1	3	Quito	2	-99	-99	-99	-99	-99	-99	-99	-99	-99	-99	-99	-99	-99	-99	-99	-99	-99	-99	-99	-99	-99	-99	-99	-99	-99	-99	-99	-99	-99	-99	-99	-99	-99	-99	-99	-99	-99	-99	-99	-99	-99	-99	-99
184	3	2	1	3	Quito	2	-99	-99	-99	-99	-99	-99	-99	-99	-99	-99	-99	-99	-99	-99	-99	-99	-99	-99	-99	-99	-99	-99	-99	-99	-99	-99	-99	-99	-99	-99	-99	-99	-99	-99	-99	-99	-99	-99	-99	-99	-99	-99	-99
185	1	2	3	1	Quito	2	0	0	198.942	0	3	1	1	1	1	3	3	2	3	3	1	4	1	1	4	4	3	1	1	4	4	4	4	3	4	4	3	3	4	4	0	0	202.118	0	4	1	2	2	1
187	1	1	2	3	Quito	2	184.757	184.757	185.124	1	5	1	6	4	7	7	7	7	7	7	7	7	7	2	6	5	5	7	6	7	7	6	6	5	7	7	2	3	2	3	0	0	310.624	0	4	3	4	4	4
188	2	3	1	2	Quito	2	-99	-99	-99	-99	-99	-99	-99	-99	-99	-99	-99	-99	-99	-99	-99	-99	-99	-99	-99	-99	-99	-99	-99	-99	-99	-99	-99	-99	-99	-99	-99	-99	-99	-99	-99	-99	-99	-99	-99	-99	-99	-99	-99
190	3	2	3	1	Quito	2	-99	-99	-99	-99	-99	-99	-99	-99	-99	-99	-99	-99	-99	-99	-99	-99	-99	-99	-99	-99	-99	-99	-99	-99	-99	-99	-99	-99	-99	-99	-99	-99	-99	-99	-99	-99	-99	-99	-99	-99	-99	-99	-99
193	1	3	2	1	Quito	2	0	0	222.207	0	7	3	4	4	2	3	4	4	5	4	1	3	1	7	7	7	4	2	2	4	6	4	7	5	5	7	5	5	5	4	0	0	266.555	0	5	1	6	6	4
194	2	1	2	3	Quito	2	-99	-99	-99	-99	-99	-99	-99	-99	-99	-99	-99	-99	-99	-99	-99	-99	-99	-99	-99	-99	-99	-99	-99	-99	-99	-99	-99	-99	-99	-99	-99	-99	-99	-99	-99	-99	-99	-99	-99	-99	-99	-99	-99
195	1	1	3	2	Quito	2	123.466	369.187	370.953	2	5	1	4	5	1	7	6	5	6	7	1	4	1	6	4	6	6	1	3	6	6	7	7	6	5	7	5	4	5	5	0	0	267.855	0	6	1	6	6	1
196	2	3	1	2	Quito	2	-99	-99	-99	-99	-99	-99	-99	-99	-99	-99	-99	-99	-99	-99	-99	-99	-99	-99	-99	-99	-99	-99	-99	-99	-99	-99	-99	-99	-99	-99	-99	-99	-99	-99	-99	-99	-99	-99	-99	-99	-99	-99	-99
197	2	3	2	1	Quito	2	-99	-99	-99	-99	-99	-99	-99	-99	-99	-99	-99	-99	-99	-99	-99	-99	-99	-99	-99	-99	-99	-99	-99	-99	-99	-99	-99	-99	-99	-99	-99	-99	-99	-99	-99	-99	-99	-99	-99	-99	-99	-99	-99
198	2	2	3	1	Quito	2	-99	-99	-99	-99	-99	-99	-99	-99	-99	-99	-99	-99	-99	-99	-99	-99	-99	-99	-99	-99	-99	-99	-99	-99	-99	-99	-99	-99	-99	-99	-99	-99	-99	-99	-99	-99	-99	-99	-99	-99	-99	-99	-99
199	2	1	3	2	Quito	2	-99	-99	-99	-99	-99	-99	-99	-99	-99	-99	-99	-99	-99	-99	-99	-99	-99	-99	-99	-99	-99	-99	-99	-99	-99	-99	-99	-99	-99	-99	-99	-99	-99	-99	-99	-99	-99	-99	-99	-99	-99	-99	-99
201	2	1	3	2	Quito	2	-99	-99	-99	-99	-99	-99	-99	-99	-99	-99	-99	-99	-99	-99	-99	-99	-99	-99	-99	-99	-99	-99	-99	-99	-99	-99	-99	-99	-99	-99	-99	-99	-99	-99	-99	-99	-99	-99	-99	-99	-99	-99	-99
202	3	3	1	2	Quito	2	-99	-99	-99	-99	-99	-99	-99	-99	-99	-99	-99	-99	-99	-99	-99	-99	-99	-99	-99	-99	-99	-99	-99	-99	-99	-99	-99	-99	-99	-99	-99	-99	-99	-99	-99	-99	-99	-99	-99	-99	-99	-99	-99
207	1	2	1	3	Quito	2	0	0	135.319	0	7	6	6	6	4	6	6	6	7	5	5	5	2	2	5	6	6	6	2	7	6	7	7	5	5	5	3	3	3	3	120.002	120.002	390.935	1	7	5	6	6	6
211	1	1	2	3	Quito	2	0	0	233.891	0	1	7	2	1	1	1	1	2	1	1	3	2	3	1	1	1	1	6	6	2	1	4	5	7	2	2	2	1	3	3	0	0	269.78	0	7	1	6	6	1
212	1	3	1	2	Quito	2	0	0	226.309	0	5	3	4	3	3	4	4	4	3	3	3	4	4	4	4	4	4	3	1	3	2	3	3	5	5	5	1	3	3	3	0	0	271.04	0	5	1	7	7	4
213	3	3	2	1	Quito	2	-99	-99	-99	-99	-99	-99	-99	-99	-99	-99	-99	-99	-99	-99	-99	-99	-99	-99	-99	-99	-99	-99	-99	-99	-99	-99	-99	-99	-99	-99	-99	-99	-99	-99	-99	-99	-99	-99	-99	-99	-99	-99	-99
215	3	1	2	3	Quito	2	-99	-99	-99	-99	-99	-99	-99	-99	-99	-99	-99	-99	-99	-99	-99	-99	-99	-99	-99	-99	-99	-99	-99	-99	-99	-99	-99	-99	-99	-99	-99	-99	-99	-99	-99	-99	-99	-99	-99	-99	-99	-99	-99
216	3	2	1	3	Quito	2	-99	-99	-99	-99	-99	-99	-99	-99	-99	-99	-99	-99	-99	-99	-99	-99	-99	-99	-99	-99	-99	-99	-99	-99	-99	-99	-99	-99	-99	-99	-99	-99	-99	-99	-99	-99	-99	-99	-99	-99	-99	-99	-99
217	3	2	1	3	Quito	2	-99	-99	-99	-99	-99	-99	-99	-99	-99	-99	-99	-99	-99	-99	-99	-99	-99	-99	-99	-99	-99	-99	-99	-99	-99	-99	-99	-99	-99	-99	-99	-99	-99	-99	-99	-99	-99	-99	-99	-99	-99	-99	-99
220	2	2	3	1	Quito	2	-99	-99	-99	-99	-99	-99	-99	-99	-99	-99	-99	-99	-99	-99	-99	-99	-99	-99	-99	-99	-99	-99	-99	-99	-99	-99	-99	-99	-99	-99	-99	-99	-99	-99	-99	-99	-99	-99	-99	-99	-99	-99	-99
226	3	3	2	1	Quito	2	-99	-99	-99	-99	-99	-99	-99	-99	-99	-99	-99	-99	-99	-99	-99	-99	-99	-99	-99	-99	-99	-99	-99	-99	-99	-99	-99	-99	-99	-99	-99	-99	-99	-99	-99	-99	-99	-99	-99	-99	-99	-99	-99
231	2	2	3	1	Quito	2	-99	-99	-99	-99	-99	-99	-99	-99	-99	-99	-99	-99	-99	-99	-99	-99	-99	-99	-99	-99	-99	-99	-99	-99	-99	-99	-99	-99	-99	-99	-99	-99	-99	-99	-99	-99	-99	-99	-99	-99	-99	-99	-99
236	3	1	3	2	Quito	2	-99	-99	-99	-99	-99	-99	-99	-99	-99	-99	-99	-99	-99	-99	-99	-99	-99	-99	-99	-99	-99	-99	-99	-99	-99	-99	-99	-99	-99	-99	-99	-99	-99	-99	-99	-99	-99	-99	-99	-99	-99	-99	-99
238	3	2	3	1	Quito	2	-99	-99	-99	-99	-99	-99	-99	-99	-99	-99	-99	-99	-99	-99	-99	-99	-99	-99	-99	-99	-99	-99	-99	-99	-99	-99	-99	-99	-99	-99	-99	-99	-99	-99	-99	-99	-99	-99	-99	-99	-99	-99	-99
241	2	2	3	1	Quito	2	-99	-99	-99	-99	-99	-99	-99	-99	-99	-99	-99	-99	-99	-99	-99	-99	-99	-99	-99	-99	-99	-99	-99	-99	-99	-99	-99	-99	-99	-99	-99	-99	-99	-99	-99	-99	-99	-99	-99	-99	-99	-99	-99
242	3	3	2	1	Quito	2	-99	-99	-99	-99	-99	-99	-99	-99	-99	-99	-99	-99	-99	-99	-99	-99	-99	-99	-99	-99	-99	-99	-99	-99	-99	-99	-99	-99	-99	-99	-99	-99	-99	-99	-99	-99	-99	-99	-99	-99	-99	-99	-99
245	3	3	2	1	Quito	2	-99	-99	-99	-99	-99	-99	-99	-99	-99	-99	-99	-99	-99	-99	-99	-99	-99	-99	-99	-99	-99	-99	-99	-99	-99	-99	-99	-99	-99	-99	-99	-99	-99	-99	-99	-99	-99	-99	-99	-99	-99	-99	-99
247	1	3	1	2	Quito	2	0	0	231.056	0	5	5	4	4	3	3	5	5	4	6	3	6	4	5	5	4	4	5	5	5	4	6	5	4	5	4	4	4	4	3	0	0	266.212	0	2	5	1	2	3
250	3	2	3	1	Quito	2	-99	-99	-99	-99	-99	-99	-99	-99	-99	-99	-99	-99	-99	-99	-99	-99	-99	-99	-99	-99	-99	-99	-99	-99	-99	-99	-99	-99	-99	-99	-99	-99	-99	-99	-99	-99	-99	-99	-99	-99	-99	-99	-99
252	2	3	1	2	Quito	2	-99	-99	-99	-99	-99	-99	-99	-99	-99	-99	-99	-99	-99	-99	-99	-99	-99	-99	-99	-99	-99	-99	-99	-99	-99	-99	-99	-99	-99	-99	-99	-99	-99	-99	-99	-99	-99	-99	-99	-99	-99	-99	-99
255	3	2	1	3	Quito	2	-99	-99	-99	-99	-99	-99	-99	-99	-99	-99	-99	-99	-99	-99	-99	-99	-99	-99	-99	-99	-99	-99	-99	-99	-99	-99	-99	-99	-99	-99	-99	-99	-99	-99	-99	-99	-99	-99	-99	-99	-99	-99	-99
257	3	2	1	3	Quito	2	-99	-99	-99	-99	-99	-99	-99	-99	-99	-99	-99	-99	-99	-99	-99	-99	-99	-99	-99	-99	-99	-99	-99	-99	-99	-99	-99	-99	-99	-99	-99	-99	-99	-99	-99	-99	-99	-99	-99	-99	-99	-99	-99
263	2	3	1	2	Quito	2	-99	-99	-99	-99	-99	-99	-99	-99	-99	-99	-99	-99	-99	-99	-99	-99	-99	-99	-99	-99	-99	-99	-99	-99	-99	-99	-99	-99	-99	-99	-99	-99	-99	-99	-99	-99	-99	-99	-99	-99	-99	-99	-99
271	2	3	2	1	Quito	2	-99	-99	-99	-99	-99	-99	-99	-99	-99	-99	-99	-99	-99	-99	-99	-99	-99	-99	-99	-99	-99	-99	-99	-99	-99	-99	-99	-99	-99	-99	-99	-99	-99	-99	-99	-99	-99	-99	-99	-99	-99	-99	-99
277	1	3	2	1	Quito	2	0	0	223.883	0	3	2	3	3	2	3	3	3	2	5	2	2	2	2	5	7	7	1	7	6	6	7	7	7	6	7	3	3	4	4	0	0	274.612	0	5	1	5	5	3
278	2	2	3	1	Quito	2	-99	-99	-99	-99	-99	-99	-99	-99	-99	-99	-99	-99	-99	-99	-99	-99	-99	-99	-99	-99	-99	-99	-99	-99	-99	-99	-99	-99	-99	-99	-99	-99	-99	-99	-99	-99	-99	-99	-99	-99	-99	-99	-99
279	3	3	1	2	Quito	2	-99	-99	-99	-99	-99	-99	-99	-99	-99	-99	-99	-99	-99	-99	-99	-99	-99	-99	-99	-99	-99	-99	-99	-99	-99	-99	-99	-99	-99	-99	-99	-99	-99	-99	-99	-99	-99	-99	-99	-99	-99	-99	-99
282	1	2	3	1	Quito	2	0	0	221.146	0	7	1	4	4	1	6	6	6	7	4	4	6	4	6	3	3	1	1	1	1	3	3	6	3	4	2	3	2	5	4	0	0	269.1	0	5	1	3	2	1
284	1	2	1	3	Quito	2	0	0	219.405	0	5	4	5	3	1	4	3	5	3	5	1	3	2	4	3	2	2	5	4	5	4	5	6	4	5	4	3	3	4	4	0	0	284.3	0	6	1	7	7	1
290	3	2	3	1	Quito	2	-99	-99	-99	-99	-99	-99	-99	-99	-99	-99	-99	-99	-99	-99	-99	-99	-99	-99	-99	-99	-99	-99	-99	-99	-99	-99	-99	-99	-99	-99	-99	-99	-99	-99	-99	-99	-99	-99	-99	-99	-99	-99	-99
299	1	3	2	1	Quito	2	0	0	211.927	0	4	4	4	4	4	4	4	4	4	5	4	3	3	4	4	4	3	6	3	5	6	5	7	5	3	5	3	4	4	3	0	0	268.069	0	4	3	3	3	5
300	2	2	3	1	Quito	2	-99	-99	-99	-99	-99	-99	-99	-99	-99	-99	-99	-99	-99	-99	-99	-99	-99	-99	-99	-99	-99	-99	-99	-99	-99	-99	-99	-99	-99	-99	-99	-99	-99	-99	-99	-99	-99	-99	-99	-99	-99	-99	-99
303	1	1	2	3	Quito	2	0	0	264.422	0	7	2	6	7	1	5	6	1	4	7	6	4	5	2	5	5	6	3	4	4	6	4	6	5	3	6	4	4	4	2	0	0	262.975	0	4	3	4	4	2
305	3	1	3	2	Quito	2	-99	-99	-99	-99	-99	-99	-99	-99	-99	-99	-99	-99	-99	-99	-99	-99	-99	-99	-99	-99	-99	-99	-99	-99	-99	-99	-99	-99	-99	-99	-99	-99	-99	-99	-99	-99	-99	-99	-99	-99	-99	-99	-99
307	2	2	1	3	Quito	2	-99	-99	-99	-99	-99	-99	-99	-99	-99	-99	-99	-99	-99	-99	-99	-99	-99	-99	-99	-99	-99	-99	-99	-99	-99	-99	-99	-99	-99	-99	-99	-99	-99	-99	-99	-99	-99	-99	-99	-99	-99	-99	-99
308	3	2	3	1	Quito	2	-99	-99	-99	-99	-99	-99	-99	-99	-99	-99	-99	-99	-99	-99	-99	-99	-99	-99	-99	-99	-99	-99	-99	-99	-99	-99	-99	-99	-99	-99	-99	-99	-99	-99	-99	-99	-99	-99	-99	-99	-99	-99	-99
313	2	1	3	2	Quito	2	-99	-99	-99	-99	-99	-99	-99	-99	-99	-99	-99	-99	-99	-99	-99	-99	-99	-99	-99	-99	-99	-99	-99	-99	-99	-99	-99	-99	-99	-99	-99	-99	-99	-99	-99	-99	-99	-99	-99	-99	-99	-99	-99
319	1	1	2	3	Quito	2	0	0	220.364	0	7	5	2	1	5	7	7	6	7	5	2	4	1	5	3	4	2	7	6	3	4	1	6	7	3	7	2	5	5	4	0	0	295.178	0	7	2	6	6	7
324	1	1	3	2	Quito	2	15.449	18.444	233.459	2	5	3	5	4	5	4	4	4	4	4	5	4	4	6	5	4	4	5	4	4	4	5	5	4	3	3	4	3	3	3	0	0	283.935	0	3	4	3	2	3
358	1	1	2	3	Quito	2	219.823	219.823	221.939	1	7	3	7	7	5	7	7	6	6	7	6	7	4	4	4	5	4	6	6	5	6	7	7	6	6	6	2	2	4	4	0	0	269.311	0	4	1	3	3	3
359	1	2	3	1	Quito	2	0	0	218.395	0	4	2	4	4	4	4	4	4	4	4	4	4	4	4	4	4	4	4	4	4	4	4	4	4	4	5	3	3	3	4	0	0	266.966	0	6	2	6	6	6
368	3	1	3	2	Quito	2	-99	-99	-99	-99	-99	-99	-99	-99	-99	-99	-99	-99	-99	-99	-99	-99	-99	-99	-99	-99	-99	-99	-99	-99	-99	-99	-99	-99	-99	-99	-99	-99	-99	-99	-99	-99	-99	-99	-99	-99	-99	-99	-99
370	3	2	3	1	Quito	2	-99	-99	-99	-99	-99	-99	-99	-99	-99	-99	-99	-99	-99	-99	-99	-99	-99	-99	-99	-99	-99	-99	-99	-99	-99	-99	-99	-99	-99	-99	-99	-99	-99	-99	-99	-99	-99	-99	-99	-99	-99	-99	-99
372	3	3	1	2	Quito	2	-99	-99	-99	-99	-99	-99	-99	-99	-99	-99	-99	-99	-99	-99	-99	-99	-99	-99	-99	-99	-99	-99	-99	-99	-99	-99	-99	-99	-99	-99	-99	-99	-99	-99	-99	-99	-99	-99	-99	-99	-99	-99	-99
373	2	2	1	3	Quito	2	-99	-99	-99	-99	-99	-99	-99	-99	-99	-99	-99	-99	-99	-99	-99	-99	-99	-99	-99	-99	-99	-99	-99	-99	-99	-99	-99	-99	-99	-99	-99	-99	-99	-99	-99	-99	-99	-99	-99	-99	-99	-99	-99
375	1	2	1	3	Quito	2	0	0	216.833	0	7	4	1	1	1	4	1	1	1	4	1	1	1	1	1	4	1	4	4	6	7	1	1	7	3	4	1	2	1	1	198.135	198.135	268.994	1	7	1	2	3	1
376	2	1	3	2	Quito	2	-99	-99	-99	-99	-99	-99	-99	-99	-99	-99	-99	-99	-99	-99	-99	-99	-99	-99	-99	-99	-99	-99	-99	-99	-99	-99	-99	-99	-99	-99	-99	-99	-99	-99	-99	-99	-99	-99	-99	-99	-99	-99	-99
377	3	1	3	2	Quito	2	-99	-99	-99	-99	-99	-99	-99	-99	-99	-99	-99	-99	-99	-99	-99	-99	-99	-99	-99	-99	-99	-99	-99	-99	-99	-99	-99	-99	-99	-99	-99	-99	-99	-99	-99	-99	-99	-99	-99	-99	-99	-99	-99
380	1	2	3	1	Quito	2	0	0	215.684	0	2	2	2	2	2	2	2	2	2	2	2	2	2	2	2	2	2	2	2	2	2	2	2	4	2	3	4	3	5	3	0	0	268.957	0	5	2	2	3	2
381	1	1	2	3	Quito	2	0	0	97.532	0	5	4	4	4	4	5	5	4	5	6	3	4	3	6	7	5	5	5	5	5	6	6	6	6	5	6	3	3	4	4	0	0	267.884	0	6	2	5	5	4
382	1	1	3	2	Quito	2	0	0	218.322	0	5	2	6	2	6	6	6	6	5	4	1	4	6	6	6	5	7	4	3	2	6	6	6	5	5	5	1	5	5	2	0	0	266.45	0	6	6	6	6	4
384	2	3	1	2	Quito	2	-99	-99	-99	-99	-99	-99	-99	-99	-99	-99	-99	-99	-99	-99	-99	-99	-99	-99	-99	-99	-99	-99	-99	-99	-99	-99	-99	-99	-99	-99	-99	-99	-99	-99	-99	-99	-99	-99	-99	-99	-99	-99	-99
385	2	2	1	3	Quito	2	-99	-99	-99	-99	-99	-99	-99	-99	-99	-99	-99	-99	-99	-99	-99	-99	-99	-99	-99	-99	-99	-99	-99	-99	-99	-99	-99	-99	-99	-99	-99	-99	-99	-99	-99	-99	-99	-99	-99	-99	-99	-99	-99
386	1	3	1	2	Quito	2	0	0	215.703	0	5	4	3	3	3	3	3	5	5	4	3	3	3	3	3	5	3	3	2	5	2	5	5	3	3	6	4	4	5	5	0	0	185.597	0	4	4	4	4	5
387	2	1	3	2	Quito	2	-99	-99	-99	-99	-99	-99	-99	-99	-99	-99	-99	-99	-99	-99	-99	-99	-99	-99	-99	-99	-99	-99	-99	-99	-99	-99	-99	-99	-99	-99	-99	-99	-99	-99	-99	-99	-99	-99	-99	-99	-99	-99	-99
389	2	3	1	2	Quito	2	-99	-99	-99	-99	-99	-99	-99	-99	-99	-99	-99	-99	-99	-99	-99	-99	-99	-99	-99	-99	-99	-99	-99	-99	-99	-99	-99	-99	-99	-99	-99	-99	-99	-99	-99	-99	-99	-99	-99	-99	-99	-99	-99
390	2	2	1	3	Quito	2	-99	-99	-99	-99	-99	-99	-99	-99	-99	-99	-99	-99	-99	-99	-99	-99	-99	-99	-99	-99	-99	-99	-99	-99	-99	-99	-99	-99	-99	-99	-99	-99	-99	-99	-99	-99	-99	-99	-99	-99	-99	-99	-99
391	1	1	2	3	Quito	2	0	0	202.369	0	6	3	5	4	4	7	6	6	6	3	4	5	5	5	5	7	6	7	7	5	2	4	4	7	6	6	4	4	2	2	0	0	108.797	0	4	3	7	6	4
392	2	1	2	3	Quito	2	-99	-99	-99	-99	-99	-99	-99	-99	-99	-99	-99	-99	-99	-99	-99	-99	-99	-99	-99	-99	-99	-99	-99	-99	-99	-99	-99	-99	-99	-99	-99	-99	-99	-99	-99	-99	-99	-99	-99	-99	-99	-99	-99
393	1	2	3	1	Quito	2	0	0	185.237	0	3	3	3	3	3	3	3	3	3	3	3	3	3	3	3	3	3	3	3	3	3	3	3	4	4	4	3	3	3	3	0	0	272.473	0	4	1	5	5	1
395	1	1	3	2	Quito	2	0	0	209.771	0	4	2	3	4	2	4	4	4	3	5	2	4	3	5	5	5	4	4	1	3	3	4	7	3	3	6	3	4	4	4	227.443	227.443	260.011	1	3	3	4	4	5
396	2	3	2	1	Quito	2	-99	-99	-99	-99	-99	-99	-99	-99	-99	-99	-99	-99	-99	-99	-99	-99	-99	-99	-99	-99	-99	-99	-99	-99	-99	-99	-99	-99	-99	-99	-99	-99	-99	-99	-99	-99	-99	-99	-99	-99	-99	-99	-99
399	3	1	3	2	Quito	2	-99	-99	-99	-99	-99	-99	-99	-99	-99	-99	-99	-99	-99	-99	-99	-99	-99	-99	-99	-99	-99	-99	-99	-99	-99	-99	-99	-99	-99	-99	-99	-99	-99	-99	-99	-99	-99	-99	-99	-99	-99	-99	-99
400	2	2	1	3	Quito	2	-99	-99	-99	-99	-99	-99	-99	-99	-99	-99	-99	-99	-99	-99	-99	-99	-99	-99	-99	-99	-99	-99	-99	-99	-99	-99	-99	-99	-99	-99	-99	-99	-99	-99	-99	-99	-99	-99	-99	-99	-99	-99	-99
404	1	1	2	3	Quito	2	13.093	13.093	217.363	1	6	3	4	6	5	6	6	6	6	5	5	5	4	6	7	5	4	5	5	4	7	6	7	6	5	5	3	3	4	5	0	0	267.624	0	7	4	7	7	6
406	3	2	1	3	Quito	2	-99	-99	-99	-99	-99	-99	-99	-99	-99	-99	-99	-99	-99	-99	-99	-99	-99	-99	-99	-99	-99	-99	-99	-99	-99	-99	-99	-99	-99	-99	-99	-99	-99	-99	-99	-99	-99	-99	-99	-99	-99	-99	-99
408	1	3	1	2	Quito	2	0	0	94.78	0	1	1	1	1	1	1	1	1	5	5	1	1	1	1	4	4	6	6	7	6	6	7	7	7	7	7	1	5	5	5	0	0	273.743	0	1	5	2	4	1
409	1	2	3	1	Quito	2	0	0	242.235	0	4	4	5	5	5	7	7	7	7	5	5	6	6	6	6	5	5	5	5	6	5	6	6	5	4	5	5	5	4	4	0	0	146.846	0	5	6	5	5	5
411	3	1	2	3	Quito	2	-99	-99	-99	-99	-99	-99	-99	-99	-99	-99	-99	-99	-99	-99	-99	-99	-99	-99	-99	-99	-99	-99	-99	-99	-99	-99	-99	-99	-99	-99	-99	-99	-99	-99	-99	-99	-99	-99	-99	-99	-99	-99	-99
412	2	3	1	2	Quito	2	-99	-99	-99	-99	-99	-99	-99	-99	-99	-99	-99	-99	-99	-99	-99	-99	-99	-99	-99	-99	-99	-99	-99	-99	-99	-99	-99	-99	-99	-99	-99	-99	-99	-99	-99	-99	-99	-99	-99	-99	-99	-99	-99
413	1	2	3	1	Quito	2	0	0	216.665	0	6	4	4	4	2	4	4	4	4	4	2	4	2	6	6	6	6	2	6	7	7	7	7	6	7	4	2	4	5	5	0	0	267.29	0	7	2	7	7	3
414	3	3	2	1	Quito	2	-99	-99	-99	-99	-99	-99	-99	-99	-99	-99	-99	-99	-99	-99	-99	-99	-99	-99	-99	-99	-99	-99	-99	-99	-99	-99	-99	-99	-99	-99	-99	-99	-99	-99	-99	-99	-99	-99	-99	-99	-99	-99	-99
415	1	1	2	3	Quito	2	0	0	226.734	0	4	2	4	4	2	5	5	5	7	6	5	4	7	7	7	6	6	4	6	6	7	7	7	5	7	7	4	3	3	4	0	0	268.471	0	6	1	5	4	1
416	3	3	2	1	Quito	2	-99	-99	-99	-99	-99	-99	-99	-99	-99	-99	-99	-99	-99	-99	-99	-99	-99	-99	-99	-99	-99	-99	-99	-99	-99	-99	-99	-99	-99	-99	-99	-99	-99	-99	-99	-99	-99	-99	-99	-99	-99	-99	-99
418	2	3	2	1	Quito	2	-99	-99	-99	-99	-99	-99	-99	-99	-99	-99	-99	-99	-99	-99	-99	-99	-99	-99	-99	-99	-99	-99	-99	-99	-99	-99	-99	-99	-99	-99	-99	-99	-99	-99	-99	-99	-99	-99	-99	-99	-99	-99	-99
420	1	3	1	2	Quito	2	0	0	218.588	0	4	3	3	3	2	4	3	3	4	3	2	1	1	1	1	3	2	1	1	2	1	1	6	4	3	4	2	4	4	4	0	0	269.455	0	3	2	3	3	3
423	1	1	2	3	Quito	2	561.672	561.672	565.172	1	1	1	1	1	1	1	1	1	1	1	1	1	1	1	1	1	1	1	1	1	1	1	1	1	1	1	1	1	1	1	0	0	340.402	0	1	1	1	1	1
1	3	3	1	2	España	3	-99	-99	-99	-99	-99	-99	-99	-99	-99	-99	-99	-99	-99	-99	-99	-99	-99	-99	-99	-99	-99	-99	-99	-99	-99	-99	-99	-99	-99	-99	-99	-99	-99	-99	-99	-99	-99	-99	-99	-99	-99	-99	-99
2	2	2	1	3	España	3	-99	-99	-99	-99	-99	-99	-99	-99	-99	-99	-99	-99	-99	-99	-99	-99	-99	-99	-99	-99	-99	-99	-99	-99	-99	-99	-99	-99	-99	-99	-99	-99	-99	-99	-99	-99	-99	-99	-99	-99	-99	-99	-99
5	2	1	2	3	España	3	-99	-99	-99	-99	-99	-99	-99	-99	-99	-99	-99	-99	-99	-99	-99	-99	-99	-99	-99	-99	-99	-99	-99	-99	-99	-99	-99	-99	-99	-99	-99	-99	-99	-99	-99	-99	-99	-99	-99	-99	-99	-99	-99
6	1	3	2	1	España	3	0	0	314.583	0	4	3	3	3	3	3	3	3	3	3	3	3	3	3	3	3	3	3	3	3	3	3	3	4	4	4	3	4	4	4	0	0	272.112	0	4	3	4	4	3
7	3	3	1	2	España	3	-99	-99	-99	-99	-99	-99	-99	-99	-99	-99	-99	-99	-99	-99	-99	-99	-99	-99	-99	-99	-99	-99	-99	-99	-99	-99	-99	-99	-99	-99	-99	-99	-99	-99	-99	-99	-99	-99	-99	-99	-99	-99	-99
8	3	2	1	3	España	3	-99	-99	-99	-99	-99	-99	-99	-99	-99	-99	-99	-99	-99	-99	-99	-99	-99	-99	-99	-99	-99	-99	-99	-99	-99	-99	-99	-99	-99	-99	-99	-99	-99	-99	-99	-99	-99	-99	-99	-99	-99	-99	-99
9	1	2	3	1	España	3	0	0	215.337	0	4	5	4	6	3	4	5	7	7	7	4	4	3	7	4	3	3	1	4	3	7	7	7	5	4	4	3	3	4	3	33.199	33.199	259.625	1	8	6	5	6	5
10	3	1	3	2	España	3	-99	-99	-99	-99	-99	-99	-99	-99	-99	-99	-99	-99	-99	-99	-99	-99	-99	-99	-99	-99	-99	-99	-99	-99	-99	-99	-99	-99	-99	-99	-99	-99	-99	-99	-99	-99	-99	-99	-99	-99	-99	-99	-99
15	1	1	3	2	España	3	325.038	325.038	326.155	1	2	1	1	1	1	1	1	1	1	1	1	1	1	1	1	1	1	1	1	1	1	1	2	6	4	4	4	3	3	2	0	0	328.413	0	8	6	4	4	3
17	3	2	3	1	España	3	-99	-99	-99	-99	-99	-99	-99	-99	-99	-99	-99	-99	-99	-99	-99	-99	-99	-99	-99	-99	-99	-99	-99	-99	-99	-99	-99	-99	-99	-99	-99	-99	-99	-99	-99	-99	-99	-99	-99	-99	-99	-99	-99
18	1	2	1	3	España	3	48.34	48.34	49.582	1	2	5	1	1	1	1	1	2	1	1	1	1	1	1	1	2	1	1	1	1	1	1	7	2	2	2	2	2	3	1	0	0	111.085	0	1	1	1	2	1
20	2	3	2	1	España	3	-99	-99	-99	-99	-99	-99	-99	-99	-99	-99	-99	-99	-99	-99	-99	-99	-99	-99	-99	-99	-99	-99	-99	-99	-99	-99	-99	-99	-99	-99	-99	-99	-99	-99	-99	-99	-99	-99	-99	-99	-99	-99	-99
21	1	3	1	2	España	3	246.117	246.117	249.059	1	4	3	2	2	2	3	2	2	2	2	2	2	2	4	3	3	2	1	2	3	3	4	5	3	2	3	2	2	2	2	55.991	55.991	382.939	1	2	3	3	3	2
22	1	2	3	1	España	3	47.518	224.013	224.982	3	6	1	4	4	1	2	3	3	2	1	1	1	1	2	2	1	1	1	1	1	1	1	2	4	3	4	2	5	5	5	270.57	270.57	275.739	1	5	1	5	5	3
24	3	3	2	1	España	3	-99	-99	-99	-99	-99	-99	-99	-99	-99	-99	-99	-99	-99	-99	-99	-99	-99	-99	-99	-99	-99	-99	-99	-99	-99	-99	-99	-99	-99	-99	-99	-99	-99	-99	-99	-99	-99	-99	-99	-99	-99	-99	-99
25	1	1	2	3	España	3	223.307	223.307	224.354	1	2	1	1	1	1	1	1	1	1	7	1	1	1	7	1	5	5	1	6	2	1	5	2	7	7	7	5	3	3	5	0	0	278.891	0	2	2	8	8	2
28	2	3	2	1	España	3	-99	-99	-99	-99	-99	-99	-99	-99	-99	-99	-99	-99	-99	-99	-99	-99	-99	-99	-99	-99	-99	-99	-99	-99	-99	-99	-99	-99	-99	-99	-99	-99	-99	-99	-99	-99	-99	-99	-99	-99	-99	-99	-99
29	3	1	3	2	España	3	-99	-99	-99	-99	-99	-99	-99	-99	-99	-99	-99	-99	-99	-99	-99	-99	-99	-99	-99	-99	-99	-99	-99	-99	-99	-99	-99	-99	-99	-99	-99	-99	-99	-99	-99	-99	-99	-99	-99	-99	-99	-99	-99
30	3	1	2	3	España	3	-99	-99	-99	-99	-99	-99	-99	-99	-99	-99	-99	-99	-99	-99	-99	-99	-99	-99	-99	-99	-99	-99	-99	-99	-99	-99	-99	-99	-99	-99	-99	-99	-99	-99	-99	-99	-99	-99	-99	-99	-99	-99	-99
31	3	2	1	3	España	3	-99	-99	-99	-99	-99	-99	-99	-99	-99	-99	-99	-99	-99	-99	-99	-99	-99	-99	-99	-99	-99	-99	-99	-99	-99	-99	-99	-99	-99	-99	-99	-99	-99	-99	-99	-99	-99	-99	-99	-99	-99	-99	-99
33	2	1	2	3	España	3	-99	-99	-99	-99	-99	-99	-99	-99	-99	-99	-99	-99	-99	-99	-99	-99	-99	-99	-99	-99	-99	-99	-99	-99	-99	-99	-99	-99	-99	-99	-99	-99	-99	-99	-99	-99	-99	-99	-99	-99	-99	-99	-99
34	2	3	1	2	España	3	-99	-99	-99	-99	-99	-99	-99	-99	-99	-99	-99	-99	-99	-99	-99	-99	-99	-99	-99	-99	-99	-99	-99	-99	-99	-99	-99	-99	-99	-99	-99	-99	-99	-99	-99	-99	-99	-99	-99	-99	-99	-99	-99
35	3	3	1	2	España	3	-99	-99	-99	-99	-99	-99	-99	-99	-99	-99	-99	-99	-99	-99	-99	-99	-99	-99	-99	-99	-99	-99	-99	-99	-99	-99	-99	-99	-99	-99	-99	-99	-99	-99	-99	-99	-99	-99	-99	-99	-99	-99	-99
39	3	1	3	2	España	3	-99	-99	-99	-99	-99	-99	-99	-99	-99	-99	-99	-99	-99	-99	-99	-99	-99	-99	-99	-99	-99	-99	-99	-99	-99	-99	-99	-99	-99	-99	-99	-99	-99	-99	-99	-99	-99	-99	-99	-99	-99	-99	-99
40	3	1	2	3	España	3	-99	-99	-99	-99	-99	-99	-99	-99	-99	-99	-99	-99	-99	-99	-99	-99	-99	-99	-99	-99	-99	-99	-99	-99	-99	-99	-99	-99	-99	-99	-99	-99	-99	-99	-99	-99	-99	-99	-99	-99	-99	-99	-99
41	1	1	2	3	España	3	0	0	218.085	0	5	3	2	2	3	4	4	3	4	5	4	4	4	5	5	5	5	5	5	5	5	5	5	5	4	5	4	5	4	4	0	0	272.132	0	6	2	5	5	5
45	2	2	1	3	España	3	-99	-99	-99	-99	-99	-99	-99	-99	-99	-99	-99	-99	-99	-99	-99	-99	-99	-99	-99	-99	-99	-99	-99	-99	-99	-99	-99	-99	-99	-99	-99	-99	-99	-99	-99	-99	-99	-99	-99	-99	-99	-99	-99
46	3	1	2	3	España	3	-99	-99	-99	-99	-99	-99	-99	-99	-99	-99	-99	-99	-99	-99	-99	-99	-99	-99	-99	-99	-99	-99	-99	-99	-99	-99	-99	-99	-99	-99	-99	-99	-99	-99	-99	-99	-99	-99	-99	-99	-99	-99	-99
47	2	1	3	2	España	3	-99	-99	-99	-99	-99	-99	-99	-99	-99	-99	-99	-99	-99	-99	-99	-99	-99	-99	-99	-99	-99	-99	-99	-99	-99	-99	-99	-99	-99	-99	-99	-99	-99	-99	-99	-99	-99	-99	-99	-99	-99	-99	-99
48	3	1	2	3	España	3	-99	-99	-99	-99	-99	-99	-99	-99	-99	-99	-99	-99	-99	-99	-99	-99	-99	-99	-99	-99	-99	-99	-99	-99	-99	-99	-99	-99	-99	-99	-99	-99	-99	-99	-99	-99	-99	-99	-99	-99	-99	-99	-99
52	2	3	1	2	España	3	-99	-99	-99	-99	-99	-99	-99	-99	-99	-99	-99	-99	-99	-99	-99	-99	-99	-99	-99	-99	-99	-99	-99	-99	-99	-99	-99	-99	-99	-99	-99	-99	-99	-99	-99	-99	-99	-99	-99	-99	-99	-99	-99
53	3	2	3	1	España	3	-99	-99	-99	-99	-99	-99	-99	-99	-99	-99	-99	-99	-99	-99	-99	-99	-99	-99	-99	-99	-99	-99	-99	-99	-99	-99	-99	-99	-99	-99	-99	-99	-99	-99	-99	-99	-99	-99	-99	-99	-99	-99	-99
54	1	3	2	1	España	3	0	0	250.944	0	2	7	1	1	1	1	1	1	1	2	1	1	1	1	1	1	1	1	1	1	1	1	1	2	2	2	3	3	3	3	201.367	201.367	244.953	1	8	2	4	4	1
55	3	1	2	3	España	3	-99	-99	-99	-99	-99	-99	-99	-99	-99	-99	-99	-99	-99	-99	-99	-99	-99	-99	-99	-99	-99	-99	-99	-99	-99	-99	-99	-99	-99	-99	-99	-99	-99	-99	-99	-99	-99	-99	-99	-99	-99	-99	-99
56	2	2	1	3	España	3	-99	-99	-99	-99	-99	-99	-99	-99	-99	-99	-99	-99	-99	-99	-99	-99	-99	-99	-99	-99	-99	-99	-99	-99	-99	-99	-99	-99	-99	-99	-99	-99	-99	-99	-99	-99	-99	-99	-99	-99	-99	-99	-99
57	2	3	2	1	España	3	-99	-99	-99	-99	-99	-99	-99	-99	-99	-99	-99	-99	-99	-99	-99	-99	-99	-99	-99	-99	-99	-99	-99	-99	-99	-99	-99	-99	-99	-99	-99	-99	-99	-99	-99	-99	-99	-99	-99	-99	-99	-99	-99
58	1	2	1	3	España	3	0	0	1.87	0	4	3	3	3	3	3	4	4	3	4	3	3	3	5	5	5	4	3	5	5	5	5	5	7	6	6	5	5	5	4	0	0	2.878	0	8	4	8	8	6
59	3	3	1	2	España	3	-99	-99	-99	-99	-99	-99	-99	-99	-99	-99	-99	-99	-99	-99	-99	-99	-99	-99	-99	-99	-99	-99	-99	-99	-99	-99	-99	-99	-99	-99	-99	-99	-99	-99	-99	-99	-99	-99	-99	-99	-99	-99	-99
60	1	3	2	1	España	3	0	0	216.885	0	7	1	6	6	7	7	7	7	7	7	5	6	6	7	6	6	3	2	3	4	7	6	7	3	4	4	2	5	5	5	0	0	267.443	0	5	1	5	4	4
61	2	2	3	1	España	3	-99	-99	-99	-99	-99	-99	-99	-99	-99	-99	-99	-99	-99	-99	-99	-99	-99	-99	-99	-99	-99	-99	-99	-99	-99	-99	-99	-99	-99	-99	-99	-99	-99	-99	-99	-99	-99	-99	-99	-99	-99	-99	-99
65	3	3	1	2	España	3	-99	-99	-99	-99	-99	-99	-99	-99	-99	-99	-99	-99	-99	-99	-99	-99	-99	-99	-99	-99	-99	-99	-99	-99	-99	-99	-99	-99	-99	-99	-99	-99	-99	-99	-99	-99	-99	-99	-99	-99	-99	-99	-99
66	3	2	1	3	España	3	-99	-99	-99	-99	-99	-99	-99	-99	-99	-99	-99	-99	-99	-99	-99	-99	-99	-99	-99	-99	-99	-99	-99	-99	-99	-99	-99	-99	-99	-99	-99	-99	-99	-99	-99	-99	-99	-99	-99	-99	-99	-99	-99
69	3	3	2	1	España	3	-99	-99	-99	-99	-99	-99	-99	-99	-99	-99	-99	-99	-99	-99	-99	-99	-99	-99	-99	-99	-99	-99	-99	-99	-99	-99	-99	-99	-99	-99	-99	-99	-99	-99	-99	-99	-99	-99	-99	-99	-99	-99	-99
71	2	3	1	2	España	3	-99	-99	-99	-99	-99	-99	-99	-99	-99	-99	-99	-99	-99	-99	-99	-99	-99	-99	-99	-99	-99	-99	-99	-99	-99	-99	-99	-99	-99	-99	-99	-99	-99	-99	-99	-99	-99	-99	-99	-99	-99	-99	-99
72	1	3	1	2	España	3	0	0	225.621	0	1	1	1	1	1	1	3	3	1	1	1	1	1	1	1	1	1	1	1	1	1	1	1	7	2	7	5	4	2	5	0	0	276.955	0	8	8	8	8	1
74	2	1	2	3	España	3	-99	-99	-99	-99	-99	-99	-99	-99	-99	-99	-99	-99	-99	-99	-99	-99	-99	-99	-99	-99	-99	-99	-99	-99	-99	-99	-99	-99	-99	-99	-99	-99	-99	-99	-99	-99	-99	-99	-99	-99	-99	-99	-99
75	2	3	1	2	España	3	-99	-99	-99	-99	-99	-99	-99	-99	-99	-99	-99	-99	-99	-99	-99	-99	-99	-99	-99	-99	-99	-99	-99	-99	-99	-99	-99	-99	-99	-99	-99	-99	-99	-99	-99	-99	-99	-99	-99	-99	-99	-99	-99
76	3	1	3	2	España	3	-99	-99	-99	-99	-99	-99	-99	-99	-99	-99	-99	-99	-99	-99	-99	-99	-99	-99	-99	-99	-99	-99	-99	-99	-99	-99	-99	-99	-99	-99	-99	-99	-99	-99	-99	-99	-99	-99	-99	-99	-99	-99	-99
79	3	2	1	3	España	3	-99	-99	-99	-99	-99	-99	-99	-99	-99	-99	-99	-99	-99	-99	-99	-99	-99	-99	-99	-99	-99	-99	-99	-99	-99	-99	-99	-99	-99	-99	-99	-99	-99	-99	-99	-99	-99	-99	-99	-99	-99	-99	-99
81	2	1	3	2	España	3	-99	-99	-99	-99	-99	-99	-99	-99	-99	-99	-99	-99	-99	-99	-99	-99	-99	-99	-99	-99	-99	-99	-99	-99	-99	-99	-99	-99	-99	-99	-99	-99	-99	-99	-99	-99	-99	-99	-99	-99	-99	-99	-99
83	1	2	1	3	España	3	0	0	217.155	0	2	1	3	2	1	3	2	2	3	2	1	2	1	1	6	5	2	1	1	2	5	6	7	7	5	7	5	5	4	2	0	0	272.093	0	2	1	3	8	1
84	2	1	3	2	España	3	-99	-99	-99	-99	-99	-99	-99	-99	-99	-99	-99	-99	-99	-99	-99	-99	-99	-99	-99	-99	-99	-99	-99	-99	-99	-99	-99	-99	-99	-99	-99	-99	-99	-99	-99	-99	-99	-99	-99	-99	-99	-99	-99
85	1	3	1	2	España	3	218.574	218.574	220.461	1	5	5	4	3	3	5	5	2	5	2	2	6	3	6	2	2	2	3	1	5	6	4	4	6	4	4	1	1	2	1	7.869	7.869	295.295	1	6	3	5	5	8
86	1	3	2	1	España	3	0	0	200.043	0	1	2	2	2	2	2	3	2	2	3	3	3	2	1	2	2	2	3	2	2	2	3	6	2	2	2	1	2	2	2	6.489	6.489	35.023	1	8	6	5	5	3
88	1	1	3	2	España	3	0	0	221.307	0	7	2	5	4	2	6	6	5	7	6	2	3	3	3	6	4	4	2	4	3	6	5	6	5	4	4	5	5	5	4	0	0	268.256	0	6	1	5	5	2
89	1	3	1	2	España	3	0	0	259.833	0	7	1	7	7	1	7	7	7	7	7	1	7	7	7	7	7	7	7	7	7	7	7	7	1	7	7	5	5	5	5	0	0	294.569	0	8	1	8	8	1
90	2	1	3	2	España	3	-99	-99	-99	-99	-99	-99	-99	-99	-99	-99	-99	-99	-99	-99	-99	-99	-99	-99	-99	-99	-99	-99	-99	-99	-99	-99	-99	-99	-99	-99	-99	-99	-99	-99	-99	-99	-99	-99	-99	-99	-99	-99	-99
92	1	2	1	3	España	3	0	0	217.656	0	6	2	4	4	5	5	4	4	5	5	3	3	2	4	5	5	4	3	4	4	4	5	6	5	4	6	2	2	2	4	0	0	274.561	0	5	2	5	4	2
94	3	3	1	2	España	3	-99	-99	-99	-99	-99	-99	-99	-99	-99	-99	-99	-99	-99	-99	-99	-99	-99	-99	-99	-99	-99	-99	-99	-99	-99	-99	-99	-99	-99	-99	-99	-99	-99	-99	-99	-99	-99	-99	-99	-99	-99	-99	-99
97	1	1	2	3	España	3	0	0	197.648	0	7	1	7	6	2	7	6	4	7	5	1	2	1	6	6	6	4	1	2	6	6	7	7	7	5	6	5	5	3	3	140.534	140.534	268.55	1	8	2	8	6	3
98	1	3	2	1	España	3	0	0	219.35	0	6	6	6	6	4	6	5	4	4	3	3	3	3	3	5	5	3	2	3	3	3	3	4	5	5	5	3	3	3	3	0	0	278.375	0	6	2	6	5	3
101	1	3	1	2	España	3	0	0	282.22	0	7	7	4	4	7	7	7	7	7	4	7	5	5	4	4	5	5	4	6	5	5	4	5	7	7	7	5	5	5	5	0	0	150.98	0	6	3	6	5	2
103	1	2	1	3	España	3	0	0	235.485	0	2	2	2	2	2	3	3	3	3	2	1	1	1	3	1	1	1	1	1	1	1	1	1	2	1	1	5	2	2	2	0	0	280.619	0	3	2	2	2	2
104	1	2	1	3	España	3	0	0	218.754	0	6	1	5	3	5	5	5	5	6	6	4	4	6	6	2	1	3	2	1	4	1	6	6	2	6	3	5	5	2	4	0	0	220.984	0	8	1	8	8	6
106	1	1	3	2	España	3	7.081	10.308	217.639	4	4	3	2	2	2	3	3	3	4	4	2	2	4	4	3	3	2	2	4	4	3	4	5	6	4	5	3	3	2	2	0	0	267.986	0	4	2	4	3	2
108	3	3	1	2	España	3	-99	-99	-99	-99	-99	-99	-99	-99	-99	-99	-99	-99	-99	-99	-99	-99	-99	-99	-99	-99	-99	-99	-99	-99	-99	-99	-99	-99	-99	-99	-99	-99	-99	-99	-99	-99	-99	-99	-99	-99	-99	-99	-99
109	2	3	2	1	España	3	-99	-99	-99	-99	-99	-99	-99	-99	-99	-99	-99	-99	-99	-99	-99	-99	-99	-99	-99	-99	-99	-99	-99	-99	-99	-99	-99	-99	-99	-99	-99	-99	-99	-99	-99	-99	-99	-99	-99	-99	-99	-99	-99
110	3	2	3	1	España	3	-99	-99	-99	-99	-99	-99	-99	-99	-99	-99	-99	-99	-99	-99	-99	-99	-99	-99	-99	-99	-99	-99	-99	-99	-99	-99	-99	-99	-99	-99	-99	-99	-99	-99	-99	-99	-99	-99	-99	-99	-99	-99	-99
111	1	2	1	3	España	3	0	0	224.498	0	1	1	1	1	1	1	1	1	1	1	1	1	1	1	1	1	1	1	1	1	1	1	1	1	1	1	5	3	2	1	0	0	273.685	0	1	1	1	1	1
114	1	1	2	3	España	3	0	0	220.172	0	6	1	7	5	6	7	7	7	6	5	6	6	5	6	7	5	5	4	4	6	7	5	7	4	6	4	5	5	5	5	0	0	269.39	0	8	4	8	8	8
115	2	3	2	1	España	3	-99	-99	-99	-99	-99	-99	-99	-99	-99	-99	-99	-99	-99	-99	-99	-99	-99	-99	-99	-99	-99	-99	-99	-99	-99	-99	-99	-99	-99	-99	-99	-99	-99	-99	-99	-99	-99	-99	-99	-99	-99	-99	-99
116	2	3	1	2	España	3	-99	-99	-99	-99	-99	-99	-99	-99	-99	-99	-99	-99	-99	-99	-99	-99	-99	-99	-99	-99	-99	-99	-99	-99	-99	-99	-99	-99	-99	-99	-99	-99	-99	-99	-99	-99	-99	-99	-99	-99	-99	-99	-99
118	2	3	2	1	España	3	-99	-99	-99	-99	-99	-99	-99	-99	-99	-99	-99	-99	-99	-99	-99	-99	-99	-99	-99	-99	-99	-99	-99	-99	-99	-99	-99	-99	-99	-99	-99	-99	-99	-99	-99	-99	-99	-99	-99	-99	-99	-99	-99
120	3	3	2	1	España	3	-99	-99	-99	-99	-99	-99	-99	-99	-99	-99	-99	-99	-99	-99	-99	-99	-99	-99	-99	-99	-99	-99	-99	-99	-99	-99	-99	-99	-99	-99	-99	-99	-99	-99	-99	-99	-99	-99	-99	-99	-99	-99	-99
121	2	1	3	2	España	3	-99	-99	-99	-99	-99	-99	-99	-99	-99	-99	-99	-99	-99	-99	-99	-99	-99	-99	-99	-99	-99	-99	-99	-99	-99	-99	-99	-99	-99	-99	-99	-99	-99	-99	-99	-99	-99	-99	-99	-99	-99	-99	-99
122	3	2	3	1	España	3	-99	-99	-99	-99	-99	-99	-99	-99	-99	-99	-99	-99	-99	-99	-99	-99	-99	-99	-99	-99	-99	-99	-99	-99	-99	-99	-99	-99	-99	-99	-99	-99	-99	-99	-99	-99	-99	-99	-99	-99	-99	-99	-99
123	1	1	2	3	España	3	72.205	72.205	225.804	1	2	2	1	2	2	3	2	3	2	1	1	2	1	4	2	2	1	1	1	3	6	3	3	5	4	4	4	5	5	4	0	0	288.498	0	4	3	4	5	2
124	2	2	3	1	España	3	-99	-99	-99	-99	-99	-99	-99	-99	-99	-99	-99	-99	-99	-99	-99	-99	-99	-99	-99	-99	-99	-99	-99	-99	-99	-99	-99	-99	-99	-99	-99	-99	-99	-99	-99	-99	-99	-99	-99	-99	-99	-99	-99
125	1	3	1	2	España	3	77.847	81.644	114.593	4	4	5	5	4	5	5	4	5	5	5	5	5	5	5	5	4	5	4	5	5	4	5	5	4	4	4	3	1	1	3	30.881	30.881	73.184	1	3	4	2	4	6
126	3	2	3	1	España	3	-99	-99	-99	-99	-99	-99	-99	-99	-99	-99	-99	-99	-99	-99	-99	-99	-99	-99	-99	-99	-99	-99	-99	-99	-99	-99	-99	-99	-99	-99	-99	-99	-99	-99	-99	-99	-99	-99	-99	-99	-99	-99	-99
128	3	2	3	1	España	3	-99	-99	-99	-99	-99	-99	-99	-99	-99	-99	-99	-99	-99	-99	-99	-99	-99	-99	-99	-99	-99	-99	-99	-99	-99	-99	-99	-99	-99	-99	-99	-99	-99	-99	-99	-99	-99	-99	-99	-99	-99	-99	-99
129	2	3	2	1	España	3	-99	-99	-99	-99	-99	-99	-99	-99	-99	-99	-99	-99	-99	-99	-99	-99	-99	-99	-99	-99	-99	-99	-99	-99	-99	-99	-99	-99	-99	-99	-99	-99	-99	-99	-99	-99	-99	-99	-99	-99	-99	-99	-99
130	2	3	2	1	España	3	-99	-99	-99	-99	-99	-99	-99	-99	-99	-99	-99	-99	-99	-99	-99	-99	-99	-99	-99	-99	-99	-99	-99	-99	-99	-99	-99	-99	-99	-99	-99	-99	-99	-99	-99	-99	-99	-99	-99	-99	-99	-99	-99
131	2	3	2	1	España	3	-99	-99	-99	-99	-99	-99	-99	-99	-99	-99	-99	-99	-99	-99	-99	-99	-99	-99	-99	-99	-99	-99	-99	-99	-99	-99	-99	-99	-99	-99	-99	-99	-99	-99	-99	-99	-99	-99	-99	-99	-99	-99	-99
132	1	1	2	3	España	3	0	0	230	0	4	3	4	3	2	3	4	4	4	4	2	3	3	3	4	4	3	3	4	3	4	4	6	5	4	6	3	4	4	2	0	0	273.783	0	5	2	5	5	2
133	2	3	1	2	España	3	-99	-99	-99	-99	-99	-99	-99	-99	-99	-99	-99	-99	-99	-99	-99	-99	-99	-99	-99	-99	-99	-99	-99	-99	-99	-99	-99	-99	-99	-99	-99	-99	-99	-99	-99	-99	-99	-99	-99	-99	-99	-99	-99
134	2	2	3	1	España	3	-99	-99	-99	-99	-99	-99	-99	-99	-99	-99	-99	-99	-99	-99	-99	-99	-99	-99	-99	-99	-99	-99	-99	-99	-99	-99	-99	-99	-99	-99	-99	-99	-99	-99	-99	-99	-99	-99	-99	-99	-99	-99	-99
136	2	1	2	3	España	3	-99	-99	-99	-99	-99	-99	-99	-99	-99	-99	-99	-99	-99	-99	-99	-99	-99	-99	-99	-99	-99	-99	-99	-99	-99	-99	-99	-99	-99	-99	-99	-99	-99	-99	-99	-99	-99	-99	-99	-99	-99	-99	-99
138	2	2	1	3	España	3	-99	-99	-99	-99	-99	-99	-99	-99	-99	-99	-99	-99	-99	-99	-99	-99	-99	-99	-99	-99	-99	-99	-99	-99	-99	-99	-99	-99	-99	-99	-99	-99	-99	-99	-99	-99	-99	-99	-99	-99	-99	-99	-99
139	3	2	3	1	España	3	-99	-99	-99	-99	-99	-99	-99	-99	-99	-99	-99	-99	-99	-99	-99	-99	-99	-99	-99	-99	-99	-99	-99	-99	-99	-99	-99	-99	-99	-99	-99	-99	-99	-99	-99	-99	-99	-99	-99	-99	-99	-99	-99
140	2	3	1	2	España	3	-99	-99	-99	-99	-99	-99	-99	-99	-99	-99	-99	-99	-99	-99	-99	-99	-99	-99	-99	-99	-99	-99	-99	-99	-99	-99	-99	-99	-99	-99	-99	-99	-99	-99	-99	-99	-99	-99	-99	-99	-99	-99	-99
141	3	3	1	2	España	3	-99	-99	-99	-99	-99	-99	-99	-99	-99	-99	-99	-99	-99	-99	-99	-99	-99	-99	-99	-99	-99	-99	-99	-99	-99	-99	-99	-99	-99	-99	-99	-99	-99	-99	-99	-99	-99	-99	-99	-99	-99	-99	-99
142	1	2	1	3	España	3	143.251	143.251	144.546	1	4	3	2	3	3	4	4	3	3	3	3	3	3	3	3	2	2	1	1	1	1	1	1	6	5	4	4	4	3	2	0	0	2.237	0	4	4	6	6	5
143	3	3	2	1	España	3	-99	-99	-99	-99	-99	-99	-99	-99	-99	-99	-99	-99	-99	-99	-99	-99	-99	-99	-99	-99	-99	-99	-99	-99	-99	-99	-99	-99	-99	-99	-99	-99	-99	-99	-99	-99	-99	-99	-99	-99	-99	-99	-99
144	3	3	1	2	España	3	-99	-99	-99	-99	-99	-99	-99	-99	-99	-99	-99	-99	-99	-99	-99	-99	-99	-99	-99	-99	-99	-99	-99	-99	-99	-99	-99	-99	-99	-99	-99	-99	-99	-99	-99	-99	-99	-99	-99	-99	-99	-99	-99
145	2	3	1	2	España	3	-99	-99	-99	-99	-99	-99	-99	-99	-99	-99	-99	-99	-99	-99	-99	-99	-99	-99	-99	-99	-99	-99	-99	-99	-99	-99	-99	-99	-99	-99	-99	-99	-99	-99	-99	-99	-99	-99	-99	-99	-99	-99	-99
146	3	2	3	1	España	3	-99	-99	-99	-99	-99	-99	-99	-99	-99	-99	-99	-99	-99	-99	-99	-99	-99	-99	-99	-99	-99	-99	-99	-99	-99	-99	-99	-99	-99	-99	-99	-99	-99	-99	-99	-99	-99	-99	-99	-99	-99	-99	-99
147	1	3	1	2	España	3	0	0	236.907	0	7	1	7	7	7	7	7	7	7	7	2	5	2	7	7	7	7	6	6	7	7	7	7	7	6	7	5	5	5	4	0	0	287.09	0	8	5	8	8	2
148	3	3	1	2	España	3	-99	-99	-99	-99	-99	-99	-99	-99	-99	-99	-99	-99	-99	-99	-99	-99	-99	-99	-99	-99	-99	-99	-99	-99	-99	-99	-99	-99	-99	-99	-99	-99	-99	-99	-99	-99	-99	-99	-99	-99	-99	-99	-99
149	1	3	2	1	España	3	3.033	3.033	313.365	1	4	7	2	2	1	5	6	6	6	7	3	3	1	2	5	3	2	3	1	1	3	4	7	5	2	4	5	5	2	2	345.015	345.015	346.898	1	8	2	8	6	2
151	3	3	1	2	España	3	-99	-99	-99	-99	-99	-99	-99	-99	-99	-99	-99	-99	-99	-99	-99	-99	-99	-99	-99	-99	-99	-99	-99	-99	-99	-99	-99	-99	-99	-99	-99	-99	-99	-99	-99	-99	-99	-99	-99	-99	-99	-99	-99
152	3	2	1	3	España	3	-99	-99	-99	-99	-99	-99	-99	-99	-99	-99	-99	-99	-99	-99	-99	-99	-99	-99	-99	-99	-99	-99	-99	-99	-99	-99	-99	-99	-99	-99	-99	-99	-99	-99	-99	-99	-99	-99	-99	-99	-99	-99	-99
153	3	2	3	1	España	3	-99	-99	-99	-99	-99	-99	-99	-99	-99	-99	-99	-99	-99	-99	-99	-99	-99	-99	-99	-99	-99	-99	-99	-99	-99	-99	-99	-99	-99	-99	-99	-99	-99	-99	-99	-99	-99	-99	-99	-99	-99	-99	-99
154	2	2	1	3	España	3	-99	-99	-99	-99	-99	-99	-99	-99	-99	-99	-99	-99	-99	-99	-99	-99	-99	-99	-99	-99	-99	-99	-99	-99	-99	-99	-99	-99	-99	-99	-99	-99	-99	-99	-99	-99	-99	-99	-99	-99	-99	-99	-99
155	3	3	1	2	España	3	-99	-99	-99	-99	-99	-99	-99	-99	-99	-99	-99	-99	-99	-99	-99	-99	-99	-99	-99	-99	-99	-99	-99	-99	-99	-99	-99	-99	-99	-99	-99	-99	-99	-99	-99	-99	-99	-99	-99	-99	-99	-99	-99
161	3	2	1	3	España	3	-99	-99	-99	-99	-99	-99	-99	-99	-99	-99	-99	-99	-99	-99	-99	-99	-99	-99	-99	-99	-99	-99	-99	-99	-99	-99	-99	-99	-99	-99	-99	-99	-99	-99	-99	-99	-99	-99	-99	-99	-99	-99	-99
162	2	2	1	3	España	3	-99	-99	-99	-99	-99	-99	-99	-99	-99	-99	-99	-99	-99	-99	-99	-99	-99	-99	-99	-99	-99	-99	-99	-99	-99	-99	-99	-99	-99	-99	-99	-99	-99	-99	-99	-99	-99	-99	-99	-99	-99	-99	-99
163	2	1	3	2	España	3	-99	-99	-99	-99	-99	-99	-99	-99	-99	-99	-99	-99	-99	-99	-99	-99	-99	-99	-99	-99	-99	-99	-99	-99	-99	-99	-99	-99	-99	-99	-99	-99	-99	-99	-99	-99	-99	-99	-99	-99	-99	-99	-99
164	3	3	1	2	España	3	-99	-99	-99	-99	-99	-99	-99	-99	-99	-99	-99	-99	-99	-99	-99	-99	-99	-99	-99	-99	-99	-99	-99	-99	-99	-99	-99	-99	-99	-99	-99	-99	-99	-99	-99	-99	-99	-99	-99	-99	-99	-99	-99
166	2	1	2	3	España	3	-99	-99	-99	-99	-99	-99	-99	-99	-99	-99	-99	-99	-99	-99	-99	-99	-99	-99	-99	-99	-99	-99	-99	-99	-99	-99	-99	-99	-99	-99	-99	-99	-99	-99	-99	-99	-99	-99	-99	-99	-99	-99	-99
167	3	2	1	3	España	3	-99	-99	-99	-99	-99	-99	-99	-99	-99	-99	-99	-99	-99	-99	-99	-99	-99	-99	-99	-99	-99	-99	-99	-99	-99	-99	-99	-99	-99	-99	-99	-99	-99	-99	-99	-99	-99	-99	-99	-99	-99	-99	-99
168	3	3	2	1	España	3	-99	-99	-99	-99	-99	-99	-99	-99	-99	-99	-99	-99	-99	-99	-99	-99	-99	-99	-99	-99	-99	-99	-99	-99	-99	-99	-99	-99	-99	-99	-99	-99	-99	-99	-99	-99	-99	-99	-99	-99	-99	-99	-99
169	3	2	1	3	España	3	-99	-99	-99	-99	-99	-99	-99	-99	-99	-99	-99	-99	-99	-99	-99	-99	-99	-99	-99	-99	-99	-99	-99	-99	-99	-99	-99	-99	-99	-99	-99	-99	-99	-99	-99	-99	-99	-99	-99	-99	-99	-99	-99
171	3	3	2	1	España	3	-99	-99	-99	-99	-99	-99	-99	-99	-99	-99	-99	-99	-99	-99	-99	-99	-99	-99	-99	-99	-99	-99	-99	-99	-99	-99	-99	-99	-99	-99	-99	-99	-99	-99	-99	-99	-99	-99	-99	-99	-99	-99	-99
172	1	1	2	3	España	3	11.018	11.018	262.337	1	6	2	5	5	5	6	5	5	6	6	4	4	5	6	6	5	6	2	2	3	3	4	6	3	2	2	5	4	4	4	0	0	308.973	0	6	2	6	5	5
173	1	1	3	2	España	3	0	0	219.261	0	1	3	1	1	1	1	1	1	1	2	1	1	1	1	1	1	1	1	1	1	1	1	2	1	1	2	1	2	1	1	0	0	267.062	0	1	1	1	1	1
174	1	1	2	3	España	3	63.605	63.605	63.954	1	4	4	4	4	4	4	4	4	3	3	2	3	2	3	2	3	3	2	2	3	2	2	2	4	4	4	3	3	3	3	0	0	81.946	0	4	4	4	4	4
176	2	1	2	3	España	3	-99	-99	-99	-99	-99	-99	-99	-99	-99	-99	-99	-99	-99	-99	-99	-99	-99	-99	-99	-99	-99	-99	-99	-99	-99	-99	-99	-99	-99	-99	-99	-99	-99	-99	-99	-99	-99	-99	-99	-99	-99	-99	-99
177	1	1	2	3	España	3	0	0	221.737	0	7	3	6	7	1	7	7	7	7	2	2	5	1	6	4	1	1	5	5	4	5	2	6	5	4	6	3	3	4	2	0	0	808.04	0	8	6	8	8	1
179	3	2	1	3	España	3	-99	-99	-99	-99	-99	-99	-99	-99	-99	-99	-99	-99	-99	-99	-99	-99	-99	-99	-99	-99	-99	-99	-99	-99	-99	-99	-99	-99	-99	-99	-99	-99	-99	-99	-99	-99	-99	-99	-99	-99	-99	-99	-99
181	3	1	2	3	España	3	-99	-99	-99	-99	-99	-99	-99	-99	-99	-99	-99	-99	-99	-99	-99	-99	-99	-99	-99	-99	-99	-99	-99	-99	-99	-99	-99	-99	-99	-99	-99	-99	-99	-99	-99	-99	-99	-99	-99	-99	-99	-99	-99
182	2	1	3	2	España	3	-99	-99	-99	-99	-99	-99	-99	-99	-99	-99	-99	-99	-99	-99	-99	-99	-99	-99	-99	-99	-99	-99	-99	-99	-99	-99	-99	-99	-99	-99	-99	-99	-99	-99	-99	-99	-99	-99	-99	-99	-99	-99	-99
184	2	2	1	3	España	3	-99	-99	-99	-99	-99	-99	-99	-99	-99	-99	-99	-99	-99	-99	-99	-99	-99	-99	-99	-99	-99	-99	-99	-99	-99	-99	-99	-99	-99	-99	-99	-99	-99	-99	-99	-99	-99	-99	-99	-99	-99	-99	-99
185	2	2	3	1	España	3	-99	-99	-99	-99	-99	-99	-99	-99	-99	-99	-99	-99	-99	-99	-99	-99	-99	-99	-99	-99	-99	-99	-99	-99	-99	-99	-99	-99	-99	-99	-99	-99	-99	-99	-99	-99	-99	-99	-99	-99	-99	-99	-99
186	1	3	1	2	España	3	0	0	218.183	0	4	6	3	3	3	3	4	4	4	2	2	2	2	4	4	3	3	3	1	1	1	1	1	7	6	7	4	5	3	4	0	0	271.694	0	6	1	6	6	2
187	1	3	2	1	España	3	0	0	309.586	0	2	2	2	2	1	2	4	4	3	2	1	1	1	1	3	2	2	1	1	1	1	2	4	4	4	4	1	1	1	1	0	0	287.291	0	4	4	4	3	2
191	3	3	1	2	España	3	-99	-99	-99	-99	-99	-99	-99	-99	-99	-99	-99	-99	-99	-99	-99	-99	-99	-99	-99	-99	-99	-99	-99	-99	-99	-99	-99	-99	-99	-99	-99	-99	-99	-99	-99	-99	-99	-99	-99	-99	-99	-99	-99
192	1	3	1	2	España	3	45.066	75.523	215.968	2	4	4	3	3	1	4	4	4	4	4	1	2	2	3	4	4	3	3	2	2	2	4	4	4	4	5	4	3	3	3	0	0	274.64	0	5	3	5	4	1
194	1	2	3	1	España	3	317.887	317.887	343.146	1	1	1	1	1	2	1	1	1	7	1	1	1	7	7	1	1	1	1	1	1	1	7	7	1	1	1	1	1	1	1	18.612	18.612	18.951	1	1	1	1	1	1
195	1	1	3	2	España	3	245.462	246.632	252.424	7	4	2	4	4	2	6	6	6	4	4	3	6	3	6	5	5	4	6	4	4	6	6	6	4	2	1	1	4	5	4	0	0	272.853	0	8	2	6	6	1
196	2	3	1	2	España	3	-99	-99	-99	-99	-99	-99	-99	-99	-99	-99	-99	-99	-99	-99	-99	-99	-99	-99	-99	-99	-99	-99	-99	-99	-99	-99	-99	-99	-99	-99	-99	-99	-99	-99	-99	-99	-99	-99	-99	-99	-99	-99	-99
197	1	1	3	2	España	3	9.767	9.767	217.013	1	7	1	4	3	1	4	2	1	3	3	1	1	1	1	5	5	2	1	1	2	2	2	3	3	2	2	5	5	5	3	0	0	2.217	0	3	3	2	2	1
199	2	2	1	3	España	3	-99	-99	-99	-99	-99	-99	-99	-99	-99	-99	-99	-99	-99	-99	-99	-99	-99	-99	-99	-99	-99	-99	-99	-99	-99	-99	-99	-99	-99	-99	-99	-99	-99	-99	-99	-99	-99	-99	-99	-99	-99	-99	-99
200	3	2	1	3	España	3	-99	-99	-99	-99	-99	-99	-99	-99	-99	-99	-99	-99	-99	-99	-99	-99	-99	-99	-99	-99	-99	-99	-99	-99	-99	-99	-99	-99	-99	-99	-99	-99	-99	-99	-99	-99	-99	-99	-99	-99	-99	-99	-99
201	3	1	3	2	España	3	-99	-99	-99	-99	-99	-99	-99	-99	-99	-99	-99	-99	-99	-99	-99	-99	-99	-99	-99	-99	-99	-99	-99	-99	-99	-99	-99	-99	-99	-99	-99	-99	-99	-99	-99	-99	-99	-99	-99	-99	-99	-99	-99
202	1	1	3	2	España	3	0	0	226.303	0	7	3	5	5	2	5	5	5	2	1	1	1	1	2	3	1	2	2	1	5	2	1	4	2	1	2	3	5	4	5	0	0	281.696	0	5	2	6	6	2
203	2	3	1	2	España	3	-99	-99	-99	-99	-99	-99	-99	-99	-99	-99	-99	-99	-99	-99	-99	-99	-99	-99	-99	-99	-99	-99	-99	-99	-99	-99	-99	-99	-99	-99	-99	-99	-99	-99	-99	-99	-99	-99	-99	-99	-99	-99	-99
204	2	2	1	3	España	3	-99	-99	-99	-99	-99	-99	-99	-99	-99	-99	-99	-99	-99	-99	-99	-99	-99	-99	-99	-99	-99	-99	-99	-99	-99	-99	-99	-99	-99	-99	-99	-99	-99	-99	-99	-99	-99	-99	-99	-99	-99	-99	-99
205	3	2	3	1	España	3	-99	-99	-99	-99	-99	-99	-99	-99	-99	-99	-99	-99	-99	-99	-99	-99	-99	-99	-99	-99	-99	-99	-99	-99	-99	-99	-99	-99	-99	-99	-99	-99	-99	-99	-99	-99	-99	-99	-99	-99	-99	-99	-99
207	2	3	2	1	España	3	-99	-99	-99	-99	-99	-99	-99	-99	-99	-99	-99	-99	-99	-99	-99	-99	-99	-99	-99	-99	-99	-99	-99	-99	-99	-99	-99	-99	-99	-99	-99	-99	-99	-99	-99	-99	-99	-99	-99	-99	-99	-99	-99
209	3	1	3	2	España	3	-99	-99	-99	-99	-99	-99	-99	-99	-99	-99	-99	-99	-99	-99	-99	-99	-99	-99	-99	-99	-99	-99	-99	-99	-99	-99	-99	-99	-99	-99	-99	-99	-99	-99	-99	-99	-99	-99	-99	-99	-99	-99	-99
210	2	3	1	2	España	3	-99	-99	-99	-99	-99	-99	-99	-99	-99	-99	-99	-99	-99	-99	-99	-99	-99	-99	-99	-99	-99	-99	-99	-99	-99	-99	-99	-99	-99	-99	-99	-99	-99	-99	-99	-99	-99	-99	-99	-99	-99	-99	-99
211	2	1	2	3	España	3	-99	-99	-99	-99	-99	-99	-99	-99	-99	-99	-99	-99	-99	-99	-99	-99	-99	-99	-99	-99	-99	-99	-99	-99	-99	-99	-99	-99	-99	-99	-99	-99	-99	-99	-99	-99	-99	-99	-99	-99	-99	-99	-99
213	3	3	2	1	España	3	-99	-99	-99	-99	-99	-99	-99	-99	-99	-99	-99	-99	-99	-99	-99	-99	-99	-99	-99	-99	-99	-99	-99	-99	-99	-99	-99	-99	-99	-99	-99	-99	-99	-99	-99	-99	-99	-99	-99	-99	-99	-99	-99
214	3	2	1	3	España	3	-99	-99	-99	-99	-99	-99	-99	-99	-99	-99	-99	-99	-99	-99	-99	-99	-99	-99	-99	-99	-99	-99	-99	-99	-99	-99	-99	-99	-99	-99	-99	-99	-99	-99	-99	-99	-99	-99	-99	-99	-99	-99	-99
215	3	2	3	1	España	3	-99	-99	-99	-99	-99	-99	-99	-99	-99	-99	-99	-99	-99	-99	-99	-99	-99	-99	-99	-99	-99	-99	-99	-99	-99	-99	-99	-99	-99	-99	-99	-99	-99	-99	-99	-99	-99	-99	-99	-99	-99	-99	-99
219	1	2	3	1	España	3	0	0	225.65	0	6	2	5	6	2	6	5	5	5	4	1	6	1	4	5	5	4	4	6	7	6	6	6	5	4	6	4	3	4	4	0	0	272.351	0	6	5	6	5	2
220	2	2	1	3	España	3	-99	-99	-99	-99	-99	-99	-99	-99	-99	-99	-99	-99	-99	-99	-99	-99	-99	-99	-99	-99	-99	-99	-99	-99	-99	-99	-99	-99	-99	-99	-99	-99	-99	-99	-99	-99	-99	-99	-99	-99	-99	-99	-99
221	2	1	3	2	España	3	-99	-99	-99	-99	-99	-99	-99	-99	-99	-99	-99	-99	-99	-99	-99	-99	-99	-99	-99	-99	-99	-99	-99	-99	-99	-99	-99	-99	-99	-99	-99	-99	-99	-99	-99	-99	-99	-99	-99	-99	-99	-99	-99
222	1	3	2	1	España	3	0	0	108.473	0	1	1	1	1	1	3	3	1	1	1	1	1	1	1	3	2	1	1	1	1	1	1	1	6	6	6	3	4	4	3	0	0	268.843	0	3	1	2	1	1
226	3	1	3	2	España	3	-99	-99	-99	-99	-99	-99	-99	-99	-99	-99	-99	-99	-99	-99	-99	-99	-99	-99	-99	-99	-99	-99	-99	-99	-99	-99	-99	-99	-99	-99	-99	-99	-99	-99	-99	-99	-99	-99	-99	-99	-99	-99	-99
228	1	3	2	1	España	3	0	0	129.647	0	2	2	2	2	2	2	2	2	2	5	2	2	2	2	7	7	2	2	2	2	7	6	2	7	7	7	5	1	1	1	0	0	258.28	0	2	2	4	2	2
230	1	1	3	2	España	3	0	0	222.363	0	7	2	5	5	6	7	7	7	7	6	4	5	4	6	5	5	5	6	5	6	5	7	7	7	6	7	1	4	2	4	0	0	304.397	0	6	5	5	6	5
232	1	1	2	3	España	3	0	0	187.454	0	5	2	4	2	2	5	5	3	2	2	1	1	2	2	2	2	2	3	2	3	1	5	7	4	4	3	4	4	3	3	0	0	225.494	0	6	1	5	6	4
233	3	3	2	1	España	3	-99	-99	-99	-99	-99	-99	-99	-99	-99	-99	-99	-99	-99	-99	-99	-99	-99	-99	-99	-99	-99	-99	-99	-99	-99	-99	-99	-99	-99	-99	-99	-99	-99	-99	-99	-99	-99	-99	-99	-99	-99	-99	-99
234	2	1	3	2	España	3	-99	-99	-99	-99	-99	-99	-99	-99	-99	-99	-99	-99	-99	-99	-99	-99	-99	-99	-99	-99	-99	-99	-99	-99	-99	-99	-99	-99	-99	-99	-99	-99	-99	-99	-99	-99	-99	-99	-99	-99	-99	-99	-99
237	3	2	1	3	España	3	-99	-99	-99	-99	-99	-99	-99	-99	-99	-99	-99	-99	-99	-99	-99	-99	-99	-99	-99	-99	-99	-99	-99	-99	-99	-99	-99	-99	-99	-99	-99	-99	-99	-99	-99	-99	-99	-99	-99	-99	-99	-99	-99
238	2	2	3	1	España	3	-99	-99	-99	-99	-99	-99	-99	-99	-99	-99	-99	-99	-99	-99	-99	-99	-99	-99	-99	-99	-99	-99	-99	-99	-99	-99	-99	-99	-99	-99	-99	-99	-99	-99	-99	-99	-99	-99	-99	-99	-99	-99	-99
239	2	2	1	3	España	3	-99	-99	-99	-99	-99	-99	-99	-99	-99	-99	-99	-99	-99	-99	-99	-99	-99	-99	-99	-99	-99	-99	-99	-99	-99	-99	-99	-99	-99	-99	-99	-99	-99	-99	-99	-99	-99	-99	-99	-99	-99	-99	-99
240	2	1	3	2	España	3	-99	-99	-99	-99	-99	-99	-99	-99	-99	-99	-99	-99	-99	-99	-99	-99	-99	-99	-99	-99	-99	-99	-99	-99	-99	-99	-99	-99	-99	-99	-99	-99	-99	-99	-99	-99	-99	-99	-99	-99	-99	-99	-99
241	2	2	3	1	España	3	-99	-99	-99	-99	-99	-99	-99	-99	-99	-99	-99	-99	-99	-99	-99	-99	-99	-99	-99	-99	-99	-99	-99	-99	-99	-99	-99	-99	-99	-99	-99	-99	-99	-99	-99	-99	-99	-99	-99	-99	-99	-99	-99
242	3	3	1	2	España	3	-99	-99	-99	-99	-99	-99	-99	-99	-99	-99	-99	-99	-99	-99	-99	-99	-99	-99	-99	-99	-99	-99	-99	-99	-99	-99	-99	-99	-99	-99	-99	-99	-99	-99	-99	-99	-99	-99	-99	-99	-99	-99	-99
243	2	2	1	3	España	3	-99	-99	-99	-99	-99	-99	-99	-99	-99	-99	-99	-99	-99	-99	-99	-99	-99	-99	-99	-99	-99	-99	-99	-99	-99	-99	-99	-99	-99	-99	-99	-99	-99	-99	-99	-99	-99	-99	-99	-99	-99	-99	-99
244	2	1	3	2	España	3	-99	-99	-99	-99	-99	-99	-99	-99	-99	-99	-99	-99	-99	-99	-99	-99	-99	-99	-99	-99	-99	-99	-99	-99	-99	-99	-99	-99	-99	-99	-99	-99	-99	-99	-99	-99	-99	-99	-99	-99	-99	-99	-99
245	1	3	2	1	España	3	232.524	232.524	233.646	1	6	1	5	4	3	3	5	5	5	3	2	5	4	5	5	4	2	1	5	5	4	4	5	5	4	5	2	4	4	4	0	0	281.423	0	8	1	5	4	3
247	1	3	2	1	España	3	0	0	223.187	0	1	1	1	1	1	1	1	1	1	1	1	1	1	1	1	1	1	1	1	1	1	1	1	4	4	4	3	3	3	3	0	0	266.947	0	4	4	4	4	1
248	2	3	1	2	España	3	-99	-99	-99	-99	-99	-99	-99	-99	-99	-99	-99	-99	-99	-99	-99	-99	-99	-99	-99	-99	-99	-99	-99	-99	-99	-99	-99	-99	-99	-99	-99	-99	-99	-99	-99	-99	-99	-99	-99	-99	-99	-99	-99
249	1	1	2	3	España	3	0	0	225.118	0	1	2	1	1	1	1	1	1	1	2	1	1	1	1	1	1	1	1	1	1	1	1	1	2	2	2	1	1	1	2	0	0	267.778	0	2	1	3	3	1
250	2	3	1	2	España	3	-99	-99	-99	-99	-99	-99	-99	-99	-99	-99	-99	-99	-99	-99	-99	-99	-99	-99	-99	-99	-99	-99	-99	-99	-99	-99	-99	-99	-99	-99	-99	-99	-99	-99	-99	-99	-99	-99	-99	-99	-99	-99	-99
251	3	3	2	1	España	3	-99	-99	-99	-99	-99	-99	-99	-99	-99	-99	-99	-99	-99	-99	-99	-99	-99	-99	-99	-99	-99	-99	-99	-99	-99	-99	-99	-99	-99	-99	-99	-99	-99	-99	-99	-99	-99	-99	-99	-99	-99	-99	-99
255	1	2	3	1	España	3	78.904	78.904	80.758	1	3	3	3	3	3	3	3	3	3	3	1	1	1	5	1	1	1	1	1	1	1	1	3	3	3	3	5	1	1	3	0	0	263.409	0	4	1	4	3	1
256	1	2	1	3	España	3	0	0	225.954	0	2	6	2	2	2	2	2	2	2	7	2	3	2	4	4	3	3	3	2	6	6	7	7	6	6	6	3	3	3	3	0	0	281.366	0	6	2	8	5	6
257	2	3	2	1	España	3	-99	-99	-99	-99	-99	-99	-99	-99	-99	-99	-99	-99	-99	-99	-99	-99	-99	-99	-99	-99	-99	-99	-99	-99	-99	-99	-99	-99	-99	-99	-99	-99	-99	-99	-99	-99	-99	-99	-99	-99	-99	-99	-99
258	3	1	3	2	España	3	-99	-99	-99	-99	-99	-99	-99	-99	-99	-99	-99	-99	-99	-99	-99	-99	-99	-99	-99	-99	-99	-99	-99	-99	-99	-99	-99	-99	-99	-99	-99	-99	-99	-99	-99	-99	-99	-99	-99	-99	-99	-99	-99
260	2	3	2	1	España	3	-99	-99	-99	-99	-99	-99	-99	-99	-99	-99	-99	-99	-99	-99	-99	-99	-99	-99	-99	-99	-99	-99	-99	-99	-99	-99	-99	-99	-99	-99	-99	-99	-99	-99	-99	-99	-99	-99	-99	-99	-99	-99	-99
261	2	1	2	3	España	3	-99	-99	-99	-99	-99	-99	-99	-99	-99	-99	-99	-99	-99	-99	-99	-99	-99	-99	-99	-99	-99	-99	-99	-99	-99	-99	-99	-99	-99	-99	-99	-99	-99	-99	-99	-99	-99	-99	-99	-99	-99	-99	-99
262	2	3	2	1	España	3	-99	-99	-99	-99	-99	-99	-99	-99	-99	-99	-99	-99	-99	-99	-99	-99	-99	-99	-99	-99	-99	-99	-99	-99	-99	-99	-99	-99	-99	-99	-99	-99	-99	-99	-99	-99	-99	-99	-99	-99	-99	-99	-99
263	3	2	1	3	España	3	-99	-99	-99	-99	-99	-99	-99	-99	-99	-99	-99	-99	-99	-99	-99	-99	-99	-99	-99	-99	-99	-99	-99	-99	-99	-99	-99	-99	-99	-99	-99	-99	-99	-99	-99	-99	-99	-99	-99	-99	-99	-99	-99
264	3	2	3	1	España	3	-99	-99	-99	-99	-99	-99	-99	-99	-99	-99	-99	-99	-99	-99	-99	-99	-99	-99	-99	-99	-99	-99	-99	-99	-99	-99	-99	-99	-99	-99	-99	-99	-99	-99	-99	-99	-99	-99	-99	-99	-99	-99	-99
265	1	3	1	2	España	3	8.954	8.954	10.226	1	1	1	1	1	1	1	1	1	1	1	1	1	1	1	1	1	1	1	1	1	1	1	1	3	3	3	3	3	1	3	0	0	17.727	0	2	2	4	4	4
266	2	2	3	1	España	3	-99	-99	-99	-99	-99	-99	-99	-99	-99	-99	-99	-99	-99	-99	-99	-99	-99	-99	-99	-99	-99	-99	-99	-99	-99	-99	-99	-99	-99	-99	-99	-99	-99	-99	-99	-99	-99	-99	-99	-99	-99	-99	-99
267	2	2	3	1	España	3	-99	-99	-99	-99	-99	-99	-99	-99	-99	-99	-99	-99	-99	-99	-99	-99	-99	-99	-99	-99	-99	-99	-99	-99	-99	-99	-99	-99	-99	-99	-99	-99	-99	-99	-99	-99	-99	-99	-99	-99	-99	-99	-99
268	2	3	1	2	España	3	-99	-99	-99	-99	-99	-99	-99	-99	-99	-99	-99	-99	-99	-99	-99	-99	-99	-99	-99	-99	-99	-99	-99	-99	-99	-99	-99	-99	-99	-99	-99	-99	-99	-99	-99	-99	-99	-99	-99	-99	-99	-99	-99
269	2	3	2	1	España	3	-99	-99	-99	-99	-99	-99	-99	-99	-99	-99	-99	-99	-99	-99	-99	-99	-99	-99	-99	-99	-99	-99	-99	-99	-99	-99	-99	-99	-99	-99	-99	-99	-99	-99	-99	-99	-99	-99	-99	-99	-99	-99	-99
270	1	2	1	3	España	3	0	0	227.033	0	7	1	6	5	1	5	5	5	6	7	1	2	1	2	5	7	5	2	4	5	5	6	7	6	7	7	2	4	4	4	0	0	276.948	0	5	1	6	5	2
271	2	2	3	1	España	3	-99	-99	-99	-99	-99	-99	-99	-99	-99	-99	-99	-99	-99	-99	-99	-99	-99	-99	-99	-99	-99	-99	-99	-99	-99	-99	-99	-99	-99	-99	-99	-99	-99	-99	-99	-99	-99	-99	-99	-99	-99	-99	-99
272	1	2	3	1	España	3	0	0	232.214	0	6	2	5	5	5	6	6	7	5	7	1	5	5	6	7	6	6	2	6	5	7	6	7	6	7	6	1	1	1	1	0	0	272.616	0	8	6	6	8	3
274	3	2	3	1	España	3	-99	-99	-99	-99	-99	-99	-99	-99	-99	-99	-99	-99	-99	-99	-99	-99	-99	-99	-99	-99	-99	-99	-99	-99	-99	-99	-99	-99	-99	-99	-99	-99	-99	-99	-99	-99	-99	-99	-99	-99	-99	-99	-99
276	2	3	1	2	España	3	-99	-99	-99	-99	-99	-99	-99	-99	-99	-99	-99	-99	-99	-99	-99	-99	-99	-99	-99	-99	-99	-99	-99	-99	-99	-99	-99	-99	-99	-99	-99	-99	-99	-99	-99	-99	-99	-99	-99	-99	-99	-99	-99
279	2	3	2	1	España	3	-99	-99	-99	-99	-99	-99	-99	-99	-99	-99	-99	-99	-99	-99	-99	-99	-99	-99	-99	-99	-99	-99	-99	-99	-99	-99	-99	-99	-99	-99	-99	-99	-99	-99	-99	-99	-99	-99	-99	-99	-99	-99	-99
282	2	3	1	2	España	3	-99	-99	-99	-99	-99	-99	-99	-99	-99	-99	-99	-99	-99	-99	-99	-99	-99	-99	-99	-99	-99	-99	-99	-99	-99	-99	-99	-99	-99	-99	-99	-99	-99	-99	-99	-99	-99	-99	-99	-99	-99	-99	-99
283	3	2	1	3	España	3	-99	-99	-99	-99	-99	-99	-99	-99	-99	-99	-99	-99	-99	-99	-99	-99	-99	-99	-99	-99	-99	-99	-99	-99	-99	-99	-99	-99	-99	-99	-99	-99	-99	-99	-99	-99	-99	-99	-99	-99	-99	-99	-99
284	2	1	3	2	España	3	-99	-99	-99	-99	-99	-99	-99	-99	-99	-99	-99	-99	-99	-99	-99	-99	-99	-99	-99	-99	-99	-99	-99	-99	-99	-99	-99	-99	-99	-99	-99	-99	-99	-99	-99	-99	-99	-99	-99	-99	-99	-99	-99
285	1	1	2	3	España	3	0	0	54.725	0	4	1	2	1	2	3	1	2	2	2	1	2	1	4	3	3	1	1	1	2	2	1	2	3	2	1	3	4	2	1	0	0	35.163	0	4	1	3	3	2
286	1	3	2	1	España	3	0	0	224.352	0	5	5	4	4	5	4	4	5	4	5	5	4	4	5	6	6	5	4	3	5	5	5	6	5	5	6	3	3	4	4	0	0	134.43	0	4	4	4	5	4
287	3	2	1	3	España	3	-99	-99	-99	-99	-99	-99	-99	-99	-99	-99	-99	-99	-99	-99	-99	-99	-99	-99	-99	-99	-99	-99	-99	-99	-99	-99	-99	-99	-99	-99	-99	-99	-99	-99	-99	-99	-99	-99	-99	-99	-99	-99	-99
288	3	1	3	2	España	3	-99	-99	-99	-99	-99	-99	-99	-99	-99	-99	-99	-99	-99	-99	-99	-99	-99	-99	-99	-99	-99	-99	-99	-99	-99	-99	-99	-99	-99	-99	-99	-99	-99	-99	-99	-99	-99	-99	-99	-99	-99	-99	-99
289	3	3	1	2	España	3	-99	-99	-99	-99	-99	-99	-99	-99	-99	-99	-99	-99	-99	-99	-99	-99	-99	-99	-99	-99	-99	-99	-99	-99	-99	-99	-99	-99	-99	-99	-99	-99	-99	-99	-99	-99	-99	-99	-99	-99	-99	-99	-99
290	3	3	2	1	España	3	-99	-99	-99	-99	-99	-99	-99	-99	-99	-99	-99	-99	-99	-99	-99	-99	-99	-99	-99	-99	-99	-99	-99	-99	-99	-99	-99	-99	-99	-99	-99	-99	-99	-99	-99	-99	-99	-99	-99	-99	-99	-99	-99
291	3	1	3	2	España	3	-99	-99	-99	-99	-99	-99	-99	-99	-99	-99	-99	-99	-99	-99	-99	-99	-99	-99	-99	-99	-99	-99	-99	-99	-99	-99	-99	-99	-99	-99	-99	-99	-99	-99	-99	-99	-99	-99	-99	-99	-99	-99	-99
292	2	1	2	3	España	3	-99	-99	-99	-99	-99	-99	-99	-99	-99	-99	-99	-99	-99	-99	-99	-99	-99	-99	-99	-99	-99	-99	-99	-99	-99	-99	-99	-99	-99	-99	-99	-99	-99	-99	-99	-99	-99	-99	-99	-99	-99	-99	-99
293	3	2	1	3	España	3	-99	-99	-99	-99	-99	-99	-99	-99	-99	-99	-99	-99	-99	-99	-99	-99	-99	-99	-99	-99	-99	-99	-99	-99	-99	-99	-99	-99	-99	-99	-99	-99	-99	-99	-99	-99	-99	-99	-99	-99	-99	-99	-99
294	2	1	2	3	España	3	-99	-99	-99	-99	-99	-99	-99	-99	-99	-99	-99	-99	-99	-99	-99	-99	-99	-99	-99	-99	-99	-99	-99	-99	-99	-99	-99	-99	-99	-99	-99	-99	-99	-99	-99	-99	-99	-99	-99	-99	-99	-99	-99
297	3	1	2	3	España	3	-99	-99	-99	-99	-99	-99	-99	-99	-99	-99	-99	-99	-99	-99	-99	-99	-99	-99	-99	-99	-99	-99	-99	-99	-99	-99	-99	-99	-99	-99	-99	-99	-99	-99	-99	-99	-99	-99	-99	-99	-99	-99	-99
298	3	2	1	3	España	3	-99	-99	-99	-99	-99	-99	-99	-99	-99	-99	-99	-99	-99	-99	-99	-99	-99	-99	-99	-99	-99	-99	-99	-99	-99	-99	-99	-99	-99	-99	-99	-99	-99	-99	-99	-99	-99	-99	-99	-99	-99	-99	-99
299	1	3	2	1	España	3	201.321	201.321	204.105	1	7	1	5	4	4	4	4	4	4	6	4	4	4	5	5	5	4	1	3	5	5	6	7	6	6	6	3	5	5	5	0	0	272.118	0	5	1	5	5	4
300	2	2	3	1	España	3	-99	-99	-99	-99	-99	-99	-99	-99	-99	-99	-99	-99	-99	-99	-99	-99	-99	-99	-99	-99	-99	-99	-99	-99	-99	-99	-99	-99	-99	-99	-99	-99	-99	-99	-99	-99	-99	-99	-99	-99	-99	-99	-99
301	2	3	1	2	España	3	-99	-99	-99	-99	-99	-99	-99	-99	-99	-99	-99	-99	-99	-99	-99	-99	-99	-99	-99	-99	-99	-99	-99	-99	-99	-99	-99	-99	-99	-99	-99	-99	-99	-99	-99	-99	-99	-99	-99	-99	-99	-99	-99
302	2	1	3	2	España	3	-99	-99	-99	-99	-99	-99	-99	-99	-99	-99	-99	-99	-99	-99	-99	-99	-99	-99	-99	-99	-99	-99	-99	-99	-99	-99	-99	-99	-99	-99	-99	-99	-99	-99	-99	-99	-99	-99	-99	-99	-99	-99	-99
304	2	1	2	3	España	3	-99	-99	-99	-99	-99	-99	-99	-99	-99	-99	-99	-99	-99	-99	-99	-99	-99	-99	-99	-99	-99	-99	-99	-99	-99	-99	-99	-99	-99	-99	-99	-99	-99	-99	-99	-99	-99	-99	-99	-99	-99	-99	-99
305	1	1	3	2	España	3	0	0	207.308	0	6	6	5	5	3	3	3	3	4	6	3	3	3	5	7	7	6	3	5	6	6	6	6	7	7	7	3	3	3	3	0	0	581.973	0	5	2	5	5	5
307	3	3	1	2	España	3	-99	-99	-99	-99	-99	-99	-99	-99	-99	-99	-99	-99	-99	-99	-99	-99	-99	-99	-99	-99	-99	-99	-99	-99	-99	-99	-99	-99	-99	-99	-99	-99	-99	-99	-99	-99	-99	-99	-99	-99	-99	-99	-99
309	3	2	3	1	España	3	-99	-99	-99	-99	-99	-99	-99	-99	-99	-99	-99	-99	-99	-99	-99	-99	-99	-99	-99	-99	-99	-99	-99	-99	-99	-99	-99	-99	-99	-99	-99	-99	-99	-99	-99	-99	-99	-99	-99	-99	-99	-99	-99
310	1	2	1	3	España	3	0	0	11.934	0	5	5	5	6	4	5	4	4	4	5	3	4	4	3	5	5	6	4	4	5	4	5	6	6	5	5	4	4	4	4	15.976	15.976	19.722	1	6	4	6	6	4
311	1	3	1	2	España	3	0	0	269.856	0	7	1	5	5	7	7	7	7	3	2	2	2	2	4	6	4	4	4	5	4	4	4	7	4	4	4	2	2	5	5	0	0	375.44	0	8	1	8	8	1
312	2	2	1	3	España	3	-99	-99	-99	-99	-99	-99	-99	-99	-99	-99	-99	-99	-99	-99	-99	-99	-99	-99	-99	-99	-99	-99	-99	-99	-99	-99	-99	-99	-99	-99	-99	-99	-99	-99	-99	-99	-99	-99	-99	-99	-99	-99	-99
314	1	2	1	3	España	3	0	0	244.022	0	7	1	6	6	2	7	7	6	2	7	1	2	1	6	7	7	6	5	7	7	7	7	7	7	7	7	5	4	4	4	0	0	481.791	0	6	1	6	5	2
315	2	3	1	2	España	3	-99	-99	-99	-99	-99	-99	-99	-99	-99	-99	-99	-99	-99	-99	-99	-99	-99	-99	-99	-99	-99	-99	-99	-99	-99	-99	-99	-99	-99	-99	-99	-99	-99	-99	-99	-99	-99	-99	-99	-99	-99	-99	-99
316	2	2	3	1	España	3	-99	-99	-99	-99	-99	-99	-99	-99	-99	-99	-99	-99	-99	-99	-99	-99	-99	-99	-99	-99	-99	-99	-99	-99	-99	-99	-99	-99	-99	-99	-99	-99	-99	-99	-99	-99	-99	-99	-99	-99	-99	-99	-99
317	1	1	3	2	España	3	0	0	217.47	0	5	3	4	3	3	3	4	3	3	3	3	3	3	4	4	3	3	3	3	4	4	4	6	5	4	5	3	2	2	3	0	0	266.833	0	4	3	4	5	5
319	1	2	3	1	España	3	0	0	223.971	0	2	4	2	2	1	1	1	1	1	2	1	1	1	1	2	1	1	1	1	1	4	3	4	6	4	5	4	5	4	4	0	0	268.089	0	8	1	8	8	8
322	2	3	1	2	España	3	-99	-99	-99	-99	-99	-99	-99	-99	-99	-99	-99	-99	-99	-99	-99	-99	-99	-99	-99	-99	-99	-99	-99	-99	-99	-99	-99	-99	-99	-99	-99	-99	-99	-99	-99	-99	-99	-99	-99	-99	-99	-99	-99
325	3	1	3	2	España	3	-99	-99	-99	-99	-99	-99	-99	-99	-99	-99	-99	-99	-99	-99	-99	-99	-99	-99	-99	-99	-99	-99	-99	-99	-99	-99	-99	-99	-99	-99	-99	-99	-99	-99	-99	-99	-99	-99	-99	-99	-99	-99	-99
326	2	1	2	3	España	3	-99	-99	-99	-99	-99	-99	-99	-99	-99	-99	-99	-99	-99	-99	-99	-99	-99	-99	-99	-99	-99	-99	-99	-99	-99	-99	-99	-99	-99	-99	-99	-99	-99	-99	-99	-99	-99	-99	-99	-99	-99	-99	-99
327	1	2	1	3	España	3	15.809	17.055	21.108	2	4	2	2	2	2	4	4	4	2	2	2	2	2	2	2	2	2	2	2	3	2	2	2	3	3	5	4	4	3	2	4.298	564.508	565.105	7	1	4	2	2	1
328	3	2	3	1	España	3	-99	-99	-99	-99	-99	-99	-99	-99	-99	-99	-99	-99	-99	-99	-99	-99	-99	-99	-99	-99	-99	-99	-99	-99	-99	-99	-99	-99	-99	-99	-99	-99	-99	-99	-99	-99	-99	-99	-99	-99	-99	-99	-99
329	3	1	2	3	España	3	-99	-99	-99	-99	-99	-99	-99	-99	-99	-99	-99	-99	-99	-99	-99	-99	-99	-99	-99	-99	-99	-99	-99	-99	-99	-99	-99	-99	-99	-99	-99	-99	-99	-99	-99	-99	-99	-99	-99	-99	-99	-99	-99
330	1	1	2	3	España	3	67.864	252.055	254.165	3	3	3	2	2	1	3	2	3	2	3	2	2	2	2	3	3	2	1	1	2	2	2	2	4	2	4	4	4	4	4	0	0	303.187	0	4	4	5	5	2
331	1	3	2	1	España	3	190.708	190.708	219.592	1	2	4	1	1	2	1	2	2	1	1	1	1	1	2	2	2	1	4	2	2	1	1	4	6	4	6	5	4	1	3	0	0	375.42	0	3	1	2	2	2
332	3	2	3	1	España	3	-99	-99	-99	-99	-99	-99	-99	-99	-99	-99	-99	-99	-99	-99	-99	-99	-99	-99	-99	-99	-99	-99	-99	-99	-99	-99	-99	-99	-99	-99	-99	-99	-99	-99	-99	-99	-99	-99	-99	-99	-99	-99	-99
334	3	1	3	2	España	3	-99	-99	-99	-99	-99	-99	-99	-99	-99	-99	-99	-99	-99	-99	-99	-99	-99	-99	-99	-99	-99	-99	-99	-99	-99	-99	-99	-99	-99	-99	-99	-99	-99	-99	-99	-99	-99	-99	-99	-99	-99	-99	-99
336	2	1	3	2	España	3	-99	-99	-99	-99	-99	-99	-99	-99	-99	-99	-99	-99	-99	-99	-99	-99	-99	-99	-99	-99	-99	-99	-99	-99	-99	-99	-99	-99	-99	-99	-99	-99	-99	-99	-99	-99	-99	-99	-99	-99	-99	-99	-99
337	2	1	3	2	España	3	-99	-99	-99	-99	-99	-99	-99	-99	-99	-99	-99	-99	-99	-99	-99	-99	-99	-99	-99	-99	-99	-99	-99	-99	-99	-99	-99	-99	-99	-99	-99	-99	-99	-99	-99	-99	-99	-99	-99	-99	-99	-99	-99
338	1	2	3	1	España	3	0	0	222.938	0	3	1	1	1	1	2	2	1	1	1	1	1	1	3	3	1	1	1	1	1	3	3	5	2	2	3	2	3	2	4	0	0	282.244	0	8	1	8	8	8
339	3	2	1	3	España	3	-99	-99	-99	-99	-99	-99	-99	-99	-99	-99	-99	-99	-99	-99	-99	-99	-99	-99	-99	-99	-99	-99	-99	-99	-99	-99	-99	-99	-99	-99	-99	-99	-99	-99	-99	-99	-99	-99	-99	-99	-99	-99	-99
340	1	3	1	2	España	3	0	0	219.991	0	5	2	4	4	2	7	7	6	5	6	1	5	1	2	5	6	5	5	2	5	6	4	7	1	6	7	3	3	4	3	0	0	292.186	0	3	6	3	3	4
341	2	1	3	2	España	3	-99	-99	-99	-99	-99	-99	-99	-99	-99	-99	-99	-99	-99	-99	-99	-99	-99	-99	-99	-99	-99	-99	-99	-99	-99	-99	-99	-99	-99	-99	-99	-99	-99	-99	-99	-99	-99	-99	-99	-99	-99	-99	-99
342	1	2	1	3	España	3	0	0	61.959	0	4	3	3	4	3	3	2	2	3	3	1	1	1	2	2	2	3	2	2	1	2	2	2	2	2	2	2	2	3	5	0	0	376.86	0	6	6	5	6	5
344	3	3	2	1	España	3	-99	-99	-99	-99	-99	-99	-99	-99	-99	-99	-99	-99	-99	-99	-99	-99	-99	-99	-99	-99	-99	-99	-99	-99	-99	-99	-99	-99	-99	-99	-99	-99	-99	-99	-99	-99	-99	-99	-99	-99	-99	-99	-99
346	2	3	1	2	España	3	-99	-99	-99	-99	-99	-99	-99	-99	-99	-99	-99	-99	-99	-99	-99	-99	-99	-99	-99	-99	-99	-99	-99	-99	-99	-99	-99	-99	-99	-99	-99	-99	-99	-99	-99	-99	-99	-99	-99	-99	-99	-99	-99
347	2	2	3	1	España	3	-99	-99	-99	-99	-99	-99	-99	-99	-99	-99	-99	-99	-99	-99	-99	-99	-99	-99	-99	-99	-99	-99	-99	-99	-99	-99	-99	-99	-99	-99	-99	-99	-99	-99	-99	-99	-99	-99	-99	-99	-99	-99	-99
348	3	3	2	1	España	3	-99	-99	-99	-99	-99	-99	-99	-99	-99	-99	-99	-99	-99	-99	-99	-99	-99	-99	-99	-99	-99	-99	-99	-99	-99	-99	-99	-99	-99	-99	-99	-99	-99	-99	-99	-99	-99	-99	-99	-99	-99	-99	-99
349	3	3	2	1	España	3	-99	-99	-99	-99	-99	-99	-99	-99	-99	-99	-99	-99	-99	-99	-99	-99	-99	-99	-99	-99	-99	-99	-99	-99	-99	-99	-99	-99	-99	-99	-99	-99	-99	-99	-99	-99	-99	-99	-99	-99	-99	-99	-99
352	3	3	2	1	España	3	-99	-99	-99	-99	-99	-99	-99	-99	-99	-99	-99	-99	-99	-99	-99	-99	-99	-99	-99	-99	-99	-99	-99	-99	-99	-99	-99	-99	-99	-99	-99	-99	-99	-99	-99	-99	-99	-99	-99	-99	-99	-99	-99
353	2	1	2	3	España	3	-99	-99	-99	-99	-99	-99	-99	-99	-99	-99	-99	-99	-99	-99	-99	-99	-99	-99	-99	-99	-99	-99	-99	-99	-99	-99	-99	-99	-99	-99	-99	-99	-99	-99	-99	-99	-99	-99	-99	-99	-99	-99	-99
354	1	2	1	3	España	3	0	0	216.551	0	4	1	4	5	1	4	5	5	4	5	2	3	4	2	5	5	5	3	6	4	5	5	5	3	4	4	2	3	3	4	0	0	278.987	0	6	1	6	5	1
355	2	3	1	2	España	3	-99	-99	-99	-99	-99	-99	-99	-99	-99	-99	-99	-99	-99	-99	-99	-99	-99	-99	-99	-99	-99	-99	-99	-99	-99	-99	-99	-99	-99	-99	-99	-99	-99	-99	-99	-99	-99	-99	-99	-99	-99	-99	-99
357	3	1	2	3	España	3	-99	-99	-99	-99	-99	-99	-99	-99	-99	-99	-99	-99	-99	-99	-99	-99	-99	-99	-99	-99	-99	-99	-99	-99	-99	-99	-99	-99	-99	-99	-99	-99	-99	-99	-99	-99	-99	-99	-99	-99	-99	-99	-99
358	3	3	2	1	España	3	-99	-99	-99	-99	-99	-99	-99	-99	-99	-99	-99	-99	-99	-99	-99	-99	-99	-99	-99	-99	-99	-99	-99	-99	-99	-99	-99	-99	-99	-99	-99	-99	-99	-99	-99	-99	-99	-99	-99	-99	-99	-99	-99
359	2	1	2	3	España	3	-99	-99	-99	-99	-99	-99	-99	-99	-99	-99	-99	-99	-99	-99	-99	-99	-99	-99	-99	-99	-99	-99	-99	-99	-99	-99	-99	-99	-99	-99	-99	-99	-99	-99	-99	-99	-99	-99	-99	-99	-99	-99	-99
360	2	1	3	2	España	3	-99	-99	-99	-99	-99	-99	-99	-99	-99	-99	-99	-99	-99	-99	-99	-99	-99	-99	-99	-99	-99	-99	-99	-99	-99	-99	-99	-99	-99	-99	-99	-99	-99	-99	-99	-99	-99	-99	-99	-99	-99	-99	-99
361	3	2	3	1	España	3	-99	-99	-99	-99	-99	-99	-99	-99	-99	-99	-99	-99	-99	-99	-99	-99	-99	-99	-99	-99	-99	-99	-99	-99	-99	-99	-99	-99	-99	-99	-99	-99	-99	-99	-99	-99	-99	-99	-99	-99	-99	-99	-99
364	1	2	1	3	España	3	0	0	215.123	0	5	1	4	4	3	5	5	5	6	2	2	2	2	5	4	5	3	1	4	5	6	4	5	5	3	6	3	3	4	4	0	0	270.526	0	5	2	5	4	3
365	3	1	2	3	España	3	-99	-99	-99	-99	-99	-99	-99	-99	-99	-99	-99	-99	-99	-99	-99	-99	-99	-99	-99	-99	-99	-99	-99	-99	-99	-99	-99	-99	-99	-99	-99	-99	-99	-99	-99	-99	-99	-99	-99	-99	-99	-99	-99
366	3	2	3	1	España	3	-99	-99	-99	-99	-99	-99	-99	-99	-99	-99	-99	-99	-99	-99	-99	-99	-99	-99	-99	-99	-99	-99	-99	-99	-99	-99	-99	-99	-99	-99	-99	-99	-99	-99	-99	-99	-99	-99	-99	-99	-99	-99	-99
367	3	3	1	2	España	3	-99	-99	-99	-99	-99	-99	-99	-99	-99	-99	-99	-99	-99	-99	-99	-99	-99	-99	-99	-99	-99	-99	-99	-99	-99	-99	-99	-99	-99	-99	-99	-99	-99	-99	-99	-99	-99	-99	-99	-99	-99	-99	-99
370	2	1	3	2	España	3	-99	-99	-99	-99	-99	-99	-99	-99	-99	-99	-99	-99	-99	-99	-99	-99	-99	-99	-99	-99	-99	-99	-99	-99	-99	-99	-99	-99	-99	-99	-99	-99	-99	-99	-99	-99	-99	-99	-99	-99	-99	-99	-99
371	3	3	1	2	España	3	-99	-99	-99	-99	-99	-99	-99	-99	-99	-99	-99	-99	-99	-99	-99	-99	-99	-99	-99	-99	-99	-99	-99	-99	-99	-99	-99	-99	-99	-99	-99	-99	-99	-99	-99	-99	-99	-99	-99	-99	-99	-99	-99
372	3	3	1	2	España	3	-99	-99	-99	-99	-99	-99	-99	-99	-99	-99	-99	-99	-99	-99	-99	-99	-99	-99	-99	-99	-99	-99	-99	-99	-99	-99	-99	-99	-99	-99	-99	-99	-99	-99	-99	-99	-99	-99	-99	-99	-99	-99	-99
373	3	1	3	2	España	3	-99	-99	-99	-99	-99	-99	-99	-99	-99	-99	-99	-99	-99	-99	-99	-99	-99	-99	-99	-99	-99	-99	-99	-99	-99	-99	-99	-99	-99	-99	-99	-99	-99	-99	-99	-99	-99	-99	-99	-99	-99	-99	-99
374	1	2	3	1	España	3	218.723	218.723	221.178	1	3	1	2	2	2	2	2	2	1	2	1	2	1	3	2	2	2	1	1	1	1	2	7	6	4	5	2	3	3	1	0	0	267.674	0	4	1	2	3	2
375	2	3	1	2	España	3	-99	-99	-99	-99	-99	-99	-99	-99	-99	-99	-99	-99	-99	-99	-99	-99	-99	-99	-99	-99	-99	-99	-99	-99	-99	-99	-99	-99	-99	-99	-99	-99	-99	-99	-99	-99	-99	-99	-99	-99	-99	-99	-99
376	1	1	3	2	España	3	0	0	302.88	0	4	2	3	2	2	4	4	4	2	3	1	1	1	2	4	3	2	1	2	2	3	3	4	2	3	3	3	2	2	2	0	0	290.077	0	5	2	4	4	3
377	1	3	1	2	España	3	238.644	240.339	241.024	4	5	1	5	5	4	5	5	5	5	5	3	4	3	6	6	6	6	3	6	6	6	7	7	6	4	6	3	4	4	4	0	0	294.001	0	5	4	5	5	2
378	3	3	2	1	España	3	-99	-99	-99	-99	-99	-99	-99	-99	-99	-99	-99	-99	-99	-99	-99	-99	-99	-99	-99	-99	-99	-99	-99	-99	-99	-99	-99	-99	-99	-99	-99	-99	-99	-99	-99	-99	-99	-99	-99	-99	-99	-99	-99
379	2	1	2	3	España	3	-99	-99	-99	-99	-99	-99	-99	-99	-99	-99	-99	-99	-99	-99	-99	-99	-99	-99	-99	-99	-99	-99	-99	-99	-99	-99	-99	-99	-99	-99	-99	-99	-99	-99	-99	-99	-99	-99	-99	-99	-99	-99	-99
380	3	2	1	3	España	3	-99	-99	-99	-99	-99	-99	-99	-99	-99	-99	-99	-99	-99	-99	-99	-99	-99	-99	-99	-99	-99	-99	-99	-99	-99	-99	-99	-99	-99	-99	-99	-99	-99	-99	-99	-99	-99	-99	-99	-99	-99	-99	-99
381	1	1	2	3	España	3	42.897	231.862	233.001	2	7	2	5	4	1	6	5	6	6	5	2	5	5	7	6	5	4	3	3	7	7	5	5	6	5	6	4	4	4	4	11.976	275.726	276.837	2	8	4	6	8	6
385	1	2	1	3	España	3	0	0	161.885	0	1	1	1	1	1	1	1	1	1	1	1	1	1	1	1	1	1	1	1	1	1	1	1	2	1	1	2	2	2	2	273.304	273.304	279.717	1	5	5	4	4	4
386	3	3	2	1	España	3	-99	-99	-99	-99	-99	-99	-99	-99	-99	-99	-99	-99	-99	-99	-99	-99	-99	-99	-99	-99	-99	-99	-99	-99	-99	-99	-99	-99	-99	-99	-99	-99	-99	-99	-99	-99	-99	-99	-99	-99	-99	-99	-99
388	2	2	3	1	España	3	-99	-99	-99	-99	-99	-99	-99	-99	-99	-99	-99	-99	-99	-99	-99	-99	-99	-99	-99	-99	-99	-99	-99	-99	-99	-99	-99	-99	-99	-99	-99	-99	-99	-99	-99	-99	-99	-99	-99	-99	-99	-99	-99
389	1	3	2	1	España	3	0	0	223.588	0	2	2	2	2	2	2	4	4	1	2	2	2	1	3	3	2	2	1	1	3	2	2	3	2	2	2	2	2	2	2	0	0	290.026	0	2	4	3	3	1
390	3	3	2	1	España	3	-99	-99	-99	-99	-99	-99	-99	-99	-99	-99	-99	-99	-99	-99	-99	-99	-99	-99	-99	-99	-99	-99	-99	-99	-99	-99	-99	-99	-99	-99	-99	-99	-99	-99	-99	-99	-99	-99	-99	-99	-99	-99	-99
392	1	2	1	3	España	3	0	0	221.366	0	6	6	4	4	3	6	5	4	5	4	4	4	4	4	4	4	4	5	4	4	4	5	5	5	5	5	4	3	4	4	0	0	281.525	0	8	1	8	8	1
393	3	3	2	1	España	3	-99	-99	-99	-99	-99	-99	-99	-99	-99	-99	-99	-99	-99	-99	-99	-99	-99	-99	-99	-99	-99	-99	-99	-99	-99	-99	-99	-99	-99	-99	-99	-99	-99	-99	-99	-99	-99	-99	-99	-99	-99	-99	-99
394	1	2	3	1	España	3	0	0	293.298	0	4	1	5	5	1	6	6	2	6	6	1	3	3	1	6	5	5	1	6	6	6	6	6	6	3	3	5	5	4	5	0	0	1.747	0	6	2	5	5	1
395	1	3	2	1	España	3	0	0	227.208	0	5	2	5	4	5	5	5	4	4	5	5	2	2	5	5	4	5	5	4	5	4	5	5	5	5	5	3	4	2	3	0	0	274.747	0	5	2	4	4	5
396	2	3	2	1	España	3	-99	-99	-99	-99	-99	-99	-99	-99	-99	-99	-99	-99	-99	-99	-99	-99	-99	-99	-99	-99	-99	-99	-99	-99	-99	-99	-99	-99	-99	-99	-99	-99	-99	-99	-99	-99	-99	-99	-99	-99	-99	-99	-99
397	3	2	3	1	España	3	-99	-99	-99	-99	-99	-99	-99	-99	-99	-99	-99	-99	-99	-99	-99	-99	-99	-99	-99	-99	-99	-99	-99	-99	-99	-99	-99	-99	-99	-99	-99	-99	-99	-99	-99	-99	-99	-99	-99	-99	-99	-99	-99
399	1	1	3	2	España	3	0	0	223.238	0	2	2	1	2	2	2	2	2	2	3	3	2	1	2	2	4	2	2	3	2	4	5	5	5	4	4	4	4	5	3	0	0	275.387	0	6	4	5	6	6
400	2	3	2	1	España	3	-99	-99	-99	-99	-99	-99	-99	-99	-99	-99	-99	-99	-99	-99	-99	-99	-99	-99	-99	-99	-99	-99	-99	-99	-99	-99	-99	-99	-99	-99	-99	-99	-99	-99	-99	-99	-99	-99	-99	-99	-99	-99	-99
403	2	3	1	2	España	3	-99	-99	-99	-99	-99	-99	-99	-99	-99	-99	-99	-99	-99	-99	-99	-99	-99	-99	-99	-99	-99	-99	-99	-99	-99	-99	-99	-99	-99	-99	-99	-99	-99	-99	-99	-99	-99	-99	-99	-99	-99	-99	-99
404	1	3	2	1	España	3	222.004	222.004	224.748	1	5	1	2	2	2	7	7	6	2	5	1	2	2	4	4	3	6	1	3	7	5	7	7	3	2	3	2	3	2	2	0	0	436.452	0	6	1	6	6	1
406	3	1	3	2	España	3	-99	-99	-99	-99	-99	-99	-99	-99	-99	-99	-99	-99	-99	-99	-99	-99	-99	-99	-99	-99	-99	-99	-99	-99	-99	-99	-99	-99	-99	-99	-99	-99	-99	-99	-99	-99	-99	-99	-99	-99	-99	-99	-99
407	3	2	1	3	España	3	-99	-99	-99	-99	-99	-99	-99	-99	-99	-99	-99	-99	-99	-99	-99	-99	-99	-99	-99	-99	-99	-99	-99	-99	-99	-99	-99	-99	-99	-99	-99	-99	-99	-99	-99	-99	-99	-99	-99	-99	-99	-99	-99
408	3	3	1	2	España	3	-99	-99	-99	-99	-99	-99	-99	-99	-99	-99	-99	-99	-99	-99	-99	-99	-99	-99	-99	-99	-99	-99	-99	-99	-99	-99	-99	-99	-99	-99	-99	-99	-99	-99	-99	-99	-99	-99	-99	-99	-99	-99	-99
409	1	1	3	2	España	3	0	0	216.553	0	5	1	2	2	1	1	2	2	1	6	1	1	1	1	4	5	1	1	1	1	1	1	1	1	1	1	1	2	2	1	0	0	268.096	0	6	1	3	2	1
410	3	2	1	3	España	3	-99	-99	-99	-99	-99	-99	-99	-99	-99	-99	-99	-99	-99	-99	-99	-99	-99	-99	-99	-99	-99	-99	-99	-99	-99	-99	-99	-99	-99	-99	-99	-99	-99	-99	-99	-99	-99	-99	-99	-99	-99	-99	-99
411	1	1	2	3	España	3	0	0	227.038	0	4	2	2	2	2	4	4	4	4	2	2	2	2	3	5	2	2	1	1	1	2	4	5	4	4	5	2	3	3	3	0	0	272.501	0	4	1	3	3	2
412	1	1	3	2	España	3	0	0	23.239	0	4	4	5	4	3	4	4	5	4	4	4	4	3	4	4	3	4	4	4	3	4	5	5	5	5	6	4	3	3	3	0	0	280.226	0	5	5	5	5	5
413	1	1	3	2	España	3	0	0	224.403	0	6	1	4	5	7	7	7	7	7	5	6	7	7	7	7	6	7	4	5	7	5	4	4	5	7	7	3	3	4	4	0	0	274.52	0	6	1	5	4	5
414	1	3	1	2	España	3	0	0	214.703	0	4	6	4	4	4	4	4	4	4	5	4	4	4	4	4	4	4	4	4	4	4	4	5	5	6	6	4	4	4	4	0	0	280.354	0	5	5	4	4	2
415	1	2	3	1	España	3	219.611	219.611	221.675	1	3	3	2	2	2	3	3	2	3	3	1	1	1	3	3	3	3	2	2	4	3	3	3	3	3	2	4	3	3	3	0	0	279.131	0	3	3	3	3	3
416	2	3	1	2	España	3	-99	-99	-99	-99	-99	-99	-99	-99	-99	-99	-99	-99	-99	-99	-99	-99	-99	-99	-99	-99	-99	-99	-99	-99	-99	-99	-99	-99	-99	-99	-99	-99	-99	-99	-99	-99	-99	-99	-99	-99	-99	-99	-99
417	1	3	2	1	España	3	225.436	225.436	226.762	1	5	1	3	7	3	7	5	5	5	7	3	4	4	2	6	7	7	6	6	6	5	7	7	6	6	7	3	1	1	2	0	0	281.024	0	8	1	5	8	4
418	2	1	2	3	España	3	-99	-99	-99	-99	-99	-99	-99	-99	-99	-99	-99	-99	-99	-99	-99	-99	-99	-99	-99	-99	-99	-99	-99	-99	-99	-99	-99	-99	-99	-99	-99	-99	-99	-99	-99	-99	-99	-99	-99	-99	-99	-99	-99
419	1	1	2	3	España	3	0	0	226.256	0	4	3	3	3	3	4	3	4	3	4	2	3	3	3	4	4	2	2	2	2	2	5	6	2	3	2	2	2	2	2	0	0	273.567	0	6	2	4	4	3
420	2	1	2	3	España	3	-99	-99	-99	-99	-99	-99	-99	-99	-99	-99	-99	-99	-99	-99	-99	-99	-99	-99	-99	-99	-99	-99	-99	-99	-99	-99	-99	-99	-99	-99	-99	-99	-99	-99	-99	-99	-99	-99	-99	-99	-99	-99	-99
421	1	3	2	1	España	3	0	0	217.607	0	5	2	3	2	2	6	6	7	4	4	1	1	1	5	7	4	2	5	4	4	5	6	7	7	5	6	3	4	3	3	0	0	271.588	0	8	8	6	5	5
423	2	3	2	1	España	3	-99	-99	-99	-99	-99	-99	-99	-99	-99	-99	-99	-99	-99	-99	-99	-99	-99	-99	-99	-99	-99	-99	-99	-99	-99	-99	-99	-99	-99	-99	-99	-99	-99	-99	-99	-99	-99	-99	-99	-99	-99	-99	-99
424	3	3	1	2	España	3	-99	-99	-99	-99	-99	-99	-99	-99	-99	-99	-99	-99	-99	-99	-99	-99	-99	-99	-99	-99	-99	-99	-99	-99	-99	-99	-99	-99	-99	-99	-99	-99	-99	-99	-99	-99	-99	-99	-99	-99	-99	-99	-99
425	3	2	1	3	España	3	-99	-99	-99	-99	-99	-99	-99	-99	-99	-99	-99	-99	-99	-99	-99	-99	-99	-99	-99	-99	-99	-99	-99	-99	-99	-99	-99	-99	-99	-99	-99	-99	-99	-99	-99	-99	-99	-99	-99	-99	-99	-99	-99
426	2	1	2	3	España	3	-99	-99	-99	-99	-99	-99	-99	-99	-99	-99	-99	-99	-99	-99	-99	-99	-99	-99	-99	-99	-99	-99	-99	-99	-99	-99	-99	-99	-99	-99	-99	-99	-99	-99	-99	-99	-99	-99	-99	-99	-99	-99	-99
427	3	2	3	1	España	3	-99	-99	-99	-99	-99	-99	-99	-99	-99	-99	-99	-99	-99	-99	-99	-99	-99	-99	-99	-99	-99	-99	-99	-99	-99	-99	-99	-99	-99	-99	-99	-99	-99	-99	-99	-99	-99	-99	-99	-99	-99	-99	-99
428	2	1	3	2	España	3	-99	-99	-99	-99	-99	-99	-99	-99	-99	-99	-99	-99	-99	-99	-99	-99	-99	-99	-99	-99	-99	-99	-99	-99	-99	-99	-99	-99	-99	-99	-99	-99	-99	-99	-99	-99	-99	-99	-99	-99	-99	-99	-99
430	1	3	1	2	España	3	0	0	235.968	0	4	2	2	2	2	2	2	2	2	2	2	2	2	2	2	2	2	2	2	2	2	4	4	2	2	2	2	2	2	2	0	0	284.437	0	6	3	5	5	5
431	1	3	2	1	España	3	164.17	220.237	221.924	2	7	1	7	7	3	7	7	7	7	6	4	5	2	6	6	5	5	6	5	6	6	7	7	6	6	6	4	4	4	4	0	0	325.05	0	6	1	5	6	2
432	2	2	3	1	España	3	-99	-99	-99	-99	-99	-99	-99	-99	-99	-99	-99	-99	-99	-99	-99	-99	-99	-99	-99	-99	-99	-99	-99	-99	-99	-99	-99	-99	-99	-99	-99	-99	-99	-99	-99	-99	-99	-99	-99	-99	-99	-99	-99
433	3	3	1	2	España	3	-99	-99	-99	-99	-99	-99	-99	-99	-99	-99	-99	-99	-99	-99	-99	-99	-99	-99	-99	-99	-99	-99	-99	-99	-99	-99	-99	-99	-99	-99	-99	-99	-99	-99	-99	-99	-99	-99	-99	-99	-99	-99	-99
435	2	3	2	1	España	3	-99	-99	-99	-99	-99	-99	-99	-99	-99	-99	-99	-99	-99	-99	-99	-99	-99	-99	-99	-99	-99	-99	-99	-99	-99	-99	-99	-99	-99	-99	-99	-99	-99	-99	-99	-99	-99	-99	-99	-99	-99	-99	-99
437	1	3	1	2	España	3	8.87	8.87	22.224	1	5	3	3	2	1	2	2	3	3	2	3	4	3	2	3	3	3	3	2	3	2	3	3	4	5	4	4	3	4	4	12.888	12.888	115.111	1	5	3	3	3	1
439	3	1	2	3	España	3	-99	-99	-99	-99	-99	-99	-99	-99	-99	-99	-99	-99	-99	-99	-99	-99	-99	-99	-99	-99	-99	-99	-99	-99	-99	-99	-99	-99	-99	-99	-99	-99	-99	-99	-99	-99	-99	-99	-99	-99	-99	-99	-99
441	3	3	1	2	España	3	-99	-99	-99	-99	-99	-99	-99	-99	-99	-99	-99	-99	-99	-99	-99	-99	-99	-99	-99	-99	-99	-99	-99	-99	-99	-99	-99	-99	-99	-99	-99	-99	-99	-99	-99	-99	-99	-99	-99	-99	-99	-99	-99
442	3	2	1	3	España	3	-99	-99	-99	-99	-99	-99	-99	-99	-99	-99	-99	-99	-99	-99	-99	-99	-99	-99	-99	-99	-99	-99	-99	-99	-99	-99	-99	-99	-99	-99	-99	-99	-99	-99	-99	-99	-99	-99	-99	-99	-99	-99	-99
443	2	3	1	2	España	3	-99	-99	-99	-99	-99	-99	-99	-99	-99	-99	-99	-99	-99	-99	-99	-99	-99	-99	-99	-99	-99	-99	-99	-99	-99	-99	-99	-99	-99	-99	-99	-99	-99	-99	-99	-99	-99	-99	-99	-99	-99	-99	-99
444	1	2	3	1	España	3	0	0	224.11	0	2	6	4	3	2	5	3	6	2	1	1	1	1	3	2	2	2	6	3	4	3	4	7	5	3	5	3	4	4	4	0	0	273.962	0	8	2	8	8	3
445	3	3	2	1	España	3	-99	-99	-99	-99	-99	-99	-99	-99	-99	-99	-99	-99	-99	-99	-99	-99	-99	-99	-99	-99	-99	-99	-99	-99	-99	-99	-99	-99	-99	-99	-99	-99	-99	-99	-99	-99	-99	-99	-99	-99	-99	-99	-99
447	2	2	3	1	España	3	-99	-99	-99	-99	-99	-99	-99	-99	-99	-99	-99	-99	-99	-99	-99	-99	-99	-99	-99	-99	-99	-99	-99	-99	-99	-99	-99	-99	-99	-99	-99	-99	-99	-99	-99	-99	-99	-99	-99	-99	-99	-99	-99
448	3	3	1	2	España	3	-99	-99	-99	-99	-99	-99	-99	-99	-99	-99	-99	-99	-99	-99	-99	-99	-99	-99	-99	-99	-99	-99	-99	-99	-99	-99	-99	-99	-99	-99	-99	-99	-99	-99	-99	-99	-99	-99	-99	-99	-99	-99	-99
449	1	2	3	1	España	3	0	0	505.975	0	7	5	6	4	7	7	6	5	6	5	6	4	4	6	6	6	4	7	6	5	5	5	7	7	5	7	4	5	5	5	0	0	335.159	0	8	8	6	5	6
450	3	1	2	3	España	3	-99	-99	-99	-99	-99	-99	-99	-99	-99	-99	-99	-99	-99	-99	-99	-99	-99	-99	-99	-99	-99	-99	-99	-99	-99	-99	-99	-99	-99	-99	-99	-99	-99	-99	-99	-99	-99	-99	-99	-99	-99	-99	-99
452	2	2	1	3	España	3	-99	-99	-99	-99	-99	-99	-99	-99	-99	-99	-99	-99	-99	-99	-99	-99	-99	-99	-99	-99	-99	-99	-99	-99	-99	-99	-99	-99	-99	-99	-99	-99	-99	-99	-99	-99	-99	-99	-99	-99	-99	-99	-99
453	3	1	3	2	España	3	-99	-99	-99	-99	-99	-99	-99	-99	-99	-99	-99	-99	-99	-99	-99	-99	-99	-99	-99	-99	-99	-99	-99	-99	-99	-99	-99	-99	-99	-99	-99	-99	-99	-99	-99	-99	-99	-99	-99	-99	-99	-99	-99
454	2	1	2	3	España	3	-99	-99	-99	-99	-99	-99	-99	-99	-99	-99	-99	-99	-99	-99	-99	-99	-99	-99	-99	-99	-99	-99	-99	-99	-99	-99	-99	-99	-99	-99	-99	-99	-99	-99	-99	-99	-99	-99	-99	-99	-99	-99	-99
456	1	3	1	2	España	3	221.836	221.836	223.423	1	6	3	5	5	6	6	6	6	6	2	2	2	2	2	2	2	2	1	1	2	6	5	5	6	3	5	5	1	1	5	0	0	617.234	0	6	2	2	5	3
457	1	3	1	2	España	3	0	0	8.124	0	4	4	3	4	4	4	3	3	4	4	3	4	5	5	4	3	3	5	5	3	4	3	4	4	5	4	5	5	5	5	0	0	2.447	0	3	1	5	4	4
458	3	1	2	3	España	3	-99	-99	-99	-99	-99	-99	-99	-99	-99	-99	-99	-99	-99	-99	-99	-99	-99	-99	-99	-99	-99	-99	-99	-99	-99	-99	-99	-99	-99	-99	-99	-99	-99	-99	-99	-99	-99	-99	-99	-99	-99	-99	-99
459	3	3	1	2	España	3	-99	-99	-99	-99	-99	-99	-99	-99	-99	-99	-99	-99	-99	-99	-99	-99	-99	-99	-99	-99	-99	-99	-99	-99	-99	-99	-99	-99	-99	-99	-99	-99	-99	-99	-99	-99	-99	-99	-99	-99	-99	-99	-99
460	2	1	2	3	España	3	-99	-99	-99	-99	-99	-99	-99	-99	-99	-99	-99	-99	-99	-99	-99	-99	-99	-99	-99	-99	-99	-99	-99	-99	-99	-99	-99	-99	-99	-99	-99	-99	-99	-99	-99	-99	-99	-99	-99	-99	-99	-99	-99
461	3	3	2	1	España	3	-99	-99	-99	-99	-99	-99	-99	-99	-99	-99	-99	-99	-99	-99	-99	-99	-99	-99	-99	-99	-99	-99	-99	-99	-99	-99	-99	-99	-99	-99	-99	-99	-99	-99	-99	-99	-99	-99	-99	-99	-99	-99	-99
462	2	3	2	1	España	3	-99	-99	-99	-99	-99	-99	-99	-99	-99	-99	-99	-99	-99	-99	-99	-99	-99	-99	-99	-99	-99	-99	-99	-99	-99	-99	-99	-99	-99	-99	-99	-99	-99	-99	-99	-99	-99	-99	-99	-99	-99	-99	-99
463	3	3	1	2	España	3	-99	-99	-99	-99	-99	-99	-99	-99	-99	-99	-99	-99	-99	-99	-99	-99	-99	-99	-99	-99	-99	-99	-99	-99	-99	-99	-99	-99	-99	-99	-99	-99	-99	-99	-99	-99	-99	-99	-99	-99	-99	-99	-99
464	3	3	2	1	España	3	-99	-99	-99	-99	-99	-99	-99	-99	-99	-99	-99	-99	-99	-99	-99	-99	-99	-99	-99	-99	-99	-99	-99	-99	-99	-99	-99	-99	-99	-99	-99	-99	-99	-99	-99	-99	-99	-99	-99	-99	-99	-99	-99
466	2	2	3	1	España	3	-99	-99	-99	-99	-99	-99	-99	-99	-99	-99	-99	-99	-99	-99	-99	-99	-99	-99	-99	-99	-99	-99	-99	-99	-99	-99	-99	-99	-99	-99	-99	-99	-99	-99	-99	-99	-99	-99	-99	-99	-99	-99	-99
467	1	3	2	1	España	3	0	0	221.009	0	3	5	2	2	2	2	2	2	2	2	1	1	1	2	2	2	2	1	1	2	2	2	5	5	2	2	2	4	4	2	0	0	272.777	0	4	2	4	3	1
469	2	3	2	1	España	3	-99	-99	-99	-99	-99	-99	-99	-99	-99	-99	-99	-99	-99	-99	-99	-99	-99	-99	-99	-99	-99	-99	-99	-99	-99	-99	-99	-99	-99	-99	-99	-99	-99	-99	-99	-99	-99	-99	-99	-99	-99	-99	-99
471	3	2	3	1	España	3	-99	-99	-99	-99	-99	-99	-99	-99	-99	-99	-99	-99	-99	-99	-99	-99	-99	-99	-99	-99	-99	-99	-99	-99	-99	-99	-99	-99	-99	-99	-99	-99	-99	-99	-99	-99	-99	-99	-99	-99	-99	-99	-99
472	3	2	3	1	España	3	-99	-99	-99	-99	-99	-99	-99	-99	-99	-99	-99	-99	-99	-99	-99	-99	-99	-99	-99	-99	-99	-99	-99	-99	-99	-99	-99	-99	-99	-99	-99	-99	-99	-99	-99	-99	-99	-99	-99	-99	-99	-99	-99
475	3	1	3	2	España	3	-99	-99	-99	-99	-99	-99	-99	-99	-99	-99	-99	-99	-99	-99	-99	-99	-99	-99	-99	-99	-99	-99	-99	-99	-99	-99	-99	-99	-99	-99	-99	-99	-99	-99	-99	-99	-99	-99	-99	-99	-99	-99	-99
476	1	2	3	1	España	3	218.512	218.512	219.937	1	7	6	7	7	5	7	7	7	6	7	5	7	7	7	7	7	7	7	7	6	7	7	7	7	7	7	2	5	5	5	0	0	269.253	0	8	6	8	8	5
478	1	1	3	2	España	3	0	0	116.831	0	1	1	4	3	1	4	3	1	2	1	1	1	1	4	3	1	1	1	3	3	1	3	6	7	7	7	3	2	2	2	0	0	303.57	0	5	4	3	3	1
479	1	3	2	1	España	3	0	0	93.453	0	6	6	6	6	6	6	6	6	6	5	6	6	6	6	6	6	6	6	6	6	6	6	6	6	6	6	4	4	4	4	0	0	15.764	0	6	6	6	6	6
480	1	2	3	1	España	3	0	0	237.053	0	2	2	2	2	2	2	2	2	2	2	2	2	2	2	2	2	2	2	2	2	2	2	2	2	2	2	5	4	4	4	0	0	275.533	0	6	6	6	8	4
481	1	1	3	2	España	3	13.031	59.002	190.083	2	7	1	3	2	7	6	5	5	5	3	1	7	3	3	4	2	1	1	1	2	4	1	4	3	6	6	3	1	1	1	0	0	272.803	0	8	4	8	4	8
482	3	1	2	3	España	3	-99	-99	-99	-99	-99	-99	-99	-99	-99	-99	-99	-99	-99	-99	-99	-99	-99	-99	-99	-99	-99	-99	-99	-99	-99	-99	-99	-99	-99	-99	-99	-99	-99	-99	-99	-99	-99	-99	-99	-99	-99	-99	-99
483	3	3	1	2	España	3	-99	-99	-99	-99	-99	-99	-99	-99	-99	-99	-99	-99	-99	-99	-99	-99	-99	-99	-99	-99	-99	-99	-99	-99	-99	-99	-99	-99	-99	-99	-99	-99	-99	-99	-99	-99	-99	-99	-99	-99	-99	-99	-99
487	1	1	2	3	España	3	0	0	218.601	0	5	2	4	4	1	5	5	4	4	5	2	2	2	5	4	4	4	5	5	5	5	5	6	5	6	6	5	5	5	5	0	0	268.174	0	8	1	8	8	1
489	1	3	2	1	España	3	31.564	31.564	109.3	1	5	1	5	1	1	5	7	1	1	1	1	1	1	1	1	1	1	1	5	5	4	4	7	5	6	5	1	1	1	1	0	0	69.497	0	5	1	3	3	1
490	3	3	2	1	España	3	-99	-99	-99	-99	-99	-99	-99	-99	-99	-99	-99	-99	-99	-99	-99	-99	-99	-99	-99	-99	-99	-99	-99	-99	-99	-99	-99	-99	-99	-99	-99	-99	-99	-99	-99	-99	-99	-99	-99	-99	-99	-99	-99
491	1	2	1	3	España	3	0	0	219.013	0	6	4	6	4	2	6	6	6	4	5	2	3	3	2	6	6	5	2	5	6	6	2	5	6	5	6	2	2	2	2	0	0	295.871	0	4	4	5	4	2
492	3	2	1	3	España	3	-99	-99	-99	-99	-99	-99	-99	-99	-99	-99	-99	-99	-99	-99	-99	-99	-99	-99	-99	-99	-99	-99	-99	-99	-99	-99	-99	-99	-99	-99	-99	-99	-99	-99	-99	-99	-99	-99	-99	-99	-99	-99	-99
493	3	3	1	2	España	3	-99	-99	-99	-99	-99	-99	-99	-99	-99	-99	-99	-99	-99	-99	-99	-99	-99	-99	-99	-99	-99	-99	-99	-99	-99	-99	-99	-99	-99	-99	-99	-99	-99	-99	-99	-99	-99	-99	-99	-99	-99	-99	-99
494	3	2	3	1	España	3	-99	-99	-99	-99	-99	-99	-99	-99	-99	-99	-99	-99	-99	-99	-99	-99	-99	-99	-99	-99	-99	-99	-99	-99	-99	-99	-99	-99	-99	-99	-99	-99	-99	-99	-99	-99	-99	-99	-99	-99	-99	-99	-99
496	3	1	3	2	España	3	-99	-99	-99	-99	-99	-99	-99	-99	-99	-99	-99	-99	-99	-99	-99	-99	-99	-99	-99	-99	-99	-99	-99	-99	-99	-99	-99	-99	-99	-99	-99	-99	-99	-99	-99	-99	-99	-99	-99	-99	-99	-99	-99
498	2	2	1	3	España	3	-99	-99	-99	-99	-99	-99	-99	-99	-99	-99	-99	-99	-99	-99	-99	-99	-99	-99	-99	-99	-99	-99	-99	-99	-99	-99	-99	-99	-99	-99	-99	-99	-99	-99	-99	-99	-99	-99	-99	-99	-99	-99	-99
499	3	2	3	1	España	3	-99	-99	-99	-99	-99	-99	-99	-99	-99	-99	-99	-99	-99	-99	-99	-99	-99	-99	-99	-99	-99	-99	-99	-99	-99	-99	-99	-99	-99	-99	-99	-99	-99	-99	-99	-99	-99	-99	-99	-99	-99	-99	-99
502	3	1	2	3	España	3	-99	-99	-99	-99	-99	-99	-99	-99	-99	-99	-99	-99	-99	-99	-99	-99	-99	-99	-99	-99	-99	-99	-99	-99	-99	-99	-99	-99	-99	-99	-99	-99	-99	-99	-99	-99	-99	-99	-99	-99	-99	-99	-99
503	2	1	3	2	España	3	-99	-99	-99	-99	-99	-99	-99	-99	-99	-99	-99	-99	-99	-99	-99	-99	-99	-99	-99	-99	-99	-99	-99	-99	-99	-99	-99	-99	-99	-99	-99	-99	-99	-99	-99	-99	-99	-99	-99	-99	-99	-99	-99
504	1	3	1	2	España	3	220.977	220.977	223.843	1	7	1	4	4	1	5	4	4	1	7	1	1	1	4	7	7	7	1	7	7	7	7	7	7	6	7	5	5	5	5	0	0	292.979	0	8	8	8	8	4
508	2	2	3	1	España	3	-99	-99	-99	-99	-99	-99	-99	-99	-99	-99	-99	-99	-99	-99	-99	-99	-99	-99	-99	-99	-99	-99	-99	-99	-99	-99	-99	-99	-99	-99	-99	-99	-99	-99	-99	-99	-99	-99	-99	-99	-99	-99	-99
511	2	1	2	3	España	3	-99	-99	-99	-99	-99	-99	-99	-99	-99	-99	-99	-99	-99	-99	-99	-99	-99	-99	-99	-99	-99	-99	-99	-99	-99	-99	-99	-99	-99	-99	-99	-99	-99	-99	-99	-99	-99	-99	-99	-99	-99	-99	-99
512	1	3	2	1	España	3	0	0	228.215	0	6	2	3	3	4	7	7	4	2	4	1	4	1	4	5	1	1	4	1	1	6	4	4	5	2	4	1	1	1	1	0	0	272.772	0	5	4	3	3	3
513	1	1	2	3	España	3	0	0	223.662	0	4	1	4	4	4	6	6	5	5	5	6	6	5	5	6	5	6	5	5	5	5	5	5	4	4	4	4	4	4	3	0	0	301.015	0	4	2	4	4	3
514	3	3	2	1	España	3	-99	-99	-99	-99	-99	-99	-99	-99	-99	-99	-99	-99	-99	-99	-99	-99	-99	-99	-99	-99	-99	-99	-99	-99	-99	-99	-99	-99	-99	-99	-99	-99	-99	-99	-99	-99	-99	-99	-99	-99	-99	-99	-99
515	2	2	3	1	España	3	-99	-99	-99	-99	-99	-99	-99	-99	-99	-99	-99	-99	-99	-99	-99	-99	-99	-99	-99	-99	-99	-99	-99	-99	-99	-99	-99	-99	-99	-99	-99	-99	-99	-99	-99	-99	-99	-99	-99	-99	-99	-99	-99
516	3	1	3	2	España	3	-99	-99	-99	-99	-99	-99	-99	-99	-99	-99	-99	-99	-99	-99	-99	-99	-99	-99	-99	-99	-99	-99	-99	-99	-99	-99	-99	-99	-99	-99	-99	-99	-99	-99	-99	-99	-99	-99	-99	-99	-99	-99	-99
517	1	3	1	2	España	3	0	0	214.745	0	4	1	3	3	1	5	5	6	6	2	2	3	2	4	2	3	3	1	2	3	3	2	6	5	6	7	5	2	2	1	0	0	268.306	0	6	1	6	5	2
519	3	2	3	1	España	3	-99	-99	-99	-99	-99	-99	-99	-99	-99	-99	-99	-99	-99	-99	-99	-99	-99	-99	-99	-99	-99	-99	-99	-99	-99	-99	-99	-99	-99	-99	-99	-99	-99	-99	-99	-99	-99	-99	-99	-99	-99	-99	-99
520	3	3	1	2	España	3	-99	-99	-99	-99	-99	-99	-99	-99	-99	-99	-99	-99	-99	-99	-99	-99	-99	-99	-99	-99	-99	-99	-99	-99	-99	-99	-99	-99	-99	-99	-99	-99	-99	-99	-99	-99	-99	-99	-99	-99	-99	-99	-99
521	3	3	2	1	España	3	-99	-99	-99	-99	-99	-99	-99	-99	-99	-99	-99	-99	-99	-99	-99	-99	-99	-99	-99	-99	-99	-99	-99	-99	-99	-99	-99	-99	-99	-99	-99	-99	-99	-99	-99	-99	-99	-99	-99	-99	-99	-99	-99
524	2	3	1	2	España	3	-99	-99	-99	-99	-99	-99	-99	-99	-99	-99	-99	-99	-99	-99	-99	-99	-99	-99	-99	-99	-99	-99	-99	-99	-99	-99	-99	-99	-99	-99	-99	-99	-99	-99	-99	-99	-99	-99	-99	-99	-99	-99	-99
526	1	1	2	3	España	3	0	0	229.611	0	3	4	3	3	2	2	2	1	2	1	1	2	1	1	3	3	2	6	6	6	4	5	7	5	5	6	4	4	4	4	0	0	271.969	0	6	5	6	8	2
527	1	1	2	3	España	3	0	0	292.675	0	4	6	4	5	1	5	5	5	2	4	1	1	4	5	4	4	4	5	3	1	5	4	7	4	4	5	1	3	1	1	0	0	269.412	0	4	4	4	4	4
528	1	3	2	1	España	3	0	0	20.649	0	5	1	6	5	1	5	5	5	5	6	1	1	1	1	5	5	5	1	4	5	6	6	6	4	6	6	1	3	4	4	0	0	264.207	0	6	1	6	8	1
529	2	3	2	1	España	3	-99	-99	-99	-99	-99	-99	-99	-99	-99	-99	-99	-99	-99	-99	-99	-99	-99	-99	-99	-99	-99	-99	-99	-99	-99	-99	-99	-99	-99	-99	-99	-99	-99	-99	-99	-99	-99	-99	-99	-99	-99	-99	-99
530	2	2	3	1	España	3	-99	-99	-99	-99	-99	-99	-99	-99	-99	-99	-99	-99	-99	-99	-99	-99	-99	-99	-99	-99	-99	-99	-99	-99	-99	-99	-99	-99	-99	-99	-99	-99	-99	-99	-99	-99	-99	-99	-99	-99	-99	-99	-99
534	3	3	2	1	España	3	-99	-99	-99	-99	-99	-99	-99	-99	-99	-99	-99	-99	-99	-99	-99	-99	-99	-99	-99	-99	-99	-99	-99	-99	-99	-99	-99	-99	-99	-99	-99	-99	-99	-99	-99	-99	-99	-99	-99	-99	-99	-99	-99
535	1	3	1	2	España	3	0	0	261.749	0	3	2	1	1	1	1	3	1	1	1	1	1	1	1	3	1	1	1	1	1	1	3	1	2	1	2	2	2	2	1	0	0	272.416	0	4	4	2	2	2
537	3	2	1	3	España	3	-99	-99	-99	-99	-99	-99	-99	-99	-99	-99	-99	-99	-99	-99	-99	-99	-99	-99	-99	-99	-99	-99	-99	-99	-99	-99	-99	-99	-99	-99	-99	-99	-99	-99	-99	-99	-99	-99	-99	-99	-99	-99	-99
538	2	3	1	2	España	3	-99	-99	-99	-99	-99	-99	-99	-99	-99	-99	-99	-99	-99	-99	-99	-99	-99	-99	-99	-99	-99	-99	-99	-99	-99	-99	-99	-99	-99	-99	-99	-99	-99	-99	-99	-99	-99	-99	-99	-99	-99	-99	-99
539	3	3	2	1	España	3	-99	-99	-99	-99	-99	-99	-99	-99	-99	-99	-99	-99	-99	-99	-99	-99	-99	-99	-99	-99	-99	-99	-99	-99	-99	-99	-99	-99	-99	-99	-99	-99	-99	-99	-99	-99	-99	-99	-99	-99	-99	-99	-99
540	1	2	3	1	España	3	218.928	219.141	221.641	2	7	1	7	4	3	7	7	7	7	6	2	3	7	7	7	7	7	6	7	7	7	7	7	7	7	7	5	5	5	5	0	0	270.335	0	8	1	8	6	1
542	1	2	1	3	España	3	3.386	3.386	4.747	1	2	1	1	1	1	1	2	2	1	2	1	1	1	2	1	1	1	1	2	2	1	1	2	1	2	1	1	1	1	1	0	0	9.609	0	1	1	2	2	1
543	1	1	3	2	España	3	187.787	187.787	188.39	1	3	1	3	2	1	3	3	2	1	3	1	1	1	2	4	3	2	1	1	2	1	3	3	4	2	4	1	2	2	1	4.915	280.966	281.976	4	3	1	3	3	1
544	3	3	1	2	España	3	-99	-99	-99	-99	-99	-99	-99	-99	-99	-99	-99	-99	-99	-99	-99	-99	-99	-99	-99	-99	-99	-99	-99	-99	-99	-99	-99	-99	-99	-99	-99	-99	-99	-99	-99	-99	-99	-99	-99	-99	-99	-99	-99
545	1	2	3	1	España	3	219.917	219.917	221.915	1	1	7	2	2	4	4	3	4	3	4	1	2	1	4	5	5	2	1	1	2	7	2	7	7	5	7	3	3	4	3	0	0	273.308	0	6	2	4	5	2
546	1	2	3	1	España	3	0	0	117.893	0	3	4	4	4	4	4	4	4	5	4	4	4	4	4	4	4	4	4	4	4	4	4	5	3	3	3	5	4	4	3	0	0	262.229	0	6	2	5	5	3
547	2	2	3	1	España	3	-99	-99	-99	-99	-99	-99	-99	-99	-99	-99	-99	-99	-99	-99	-99	-99	-99	-99	-99	-99	-99	-99	-99	-99	-99	-99	-99	-99	-99	-99	-99	-99	-99	-99	-99	-99	-99	-99	-99	-99	-99	-99	-99
548	2	1	3	2	España	3	-99	-99	-99	-99	-99	-99	-99	-99	-99	-99	-99	-99	-99	-99	-99	-99	-99	-99	-99	-99	-99	-99	-99	-99	-99	-99	-99	-99	-99	-99	-99	-99	-99	-99	-99	-99	-99	-99	-99	-99	-99	-99	-99
549	1	2	3	1	España	3	0	0	40.402	0	2	4	2	2	1	5	4	4	5	2	1	1	1	5	4	4	2	1	1	5	5	5	7	5	4	5	4	5	4	4	0	0	266.804	0	6	3	5	5	2
550	2	3	1	2	España	3	-99	-99	-99	-99	-99	-99	-99	-99	-99	-99	-99	-99	-99	-99	-99	-99	-99	-99	-99	-99	-99	-99	-99	-99	-99	-99	-99	-99	-99	-99	-99	-99	-99	-99	-99	-99	-99	-99	-99	-99	-99	-99	-99
551	2	2	1	3	España	3	-99	-99	-99	-99	-99	-99	-99	-99	-99	-99	-99	-99	-99	-99	-99	-99	-99	-99	-99	-99	-99	-99	-99	-99	-99	-99	-99	-99	-99	-99	-99	-99	-99	-99	-99	-99	-99	-99	-99	-99	-99	-99	-99
553	1	2	3	1	España	3	0	0	217.244	0	7	4	6	6	5	6	6	6	5	6	5	5	6	6	6	6	6	5	6	6	6	7	7	6	6	6	4	4	4	4	0	0	269.6	0	8	5	6	6	6
554	1	1	2	3	España	3	0	0	356.92	0	1	3	1	1	1	1	1	1	1	1	1	1	1	1	1	1	1	1	1	1	1	1	1	2	3	3	2	3	3	3	0	0	271.496	0	8	3	5	5	5
555	1	1	2	3	España	3	90.15	360.35	362.944	2	4	1	4	3	4	6	6	6	6	5	4	7	3	6	7	6	4	5	5	7	6	6	7	6	6	7	2	3	3	4	0	0	337.591	0	8	5	8	8	5
556	2	3	1	2	España	3	-99	-99	-99	-99	-99	-99	-99	-99	-99	-99	-99	-99	-99	-99	-99	-99	-99	-99	-99	-99	-99	-99	-99	-99	-99	-99	-99	-99	-99	-99	-99	-99	-99	-99	-99	-99	-99	-99	-99	-99	-99	-99	-99
557	1	1	3	2	España	3	0	0	274.468	0	5	4	6	5	3	6	5	5	4	6	4	4	4	4	5	4	5	5	5	4	4	4	4	5	6	6	3	3	3	3	0	0	171.983	0	6	6	5	6	6
558	1	3	2	1	España	3	224.914	225.661	227.03	5	3	1	3	3	1	1	2	1	1	1	1	1	1	1	1	1	1	1	1	1	1	1	7	1	1	1	4	3	3	3	0	0	276.461	0	6	1	6	6	1
559	2	1	3	2	España	3	-99	-99	-99	-99	-99	-99	-99	-99	-99	-99	-99	-99	-99	-99	-99	-99	-99	-99	-99	-99	-99	-99	-99	-99	-99	-99	-99	-99	-99	-99	-99	-99	-99	-99	-99	-99	-99	-99	-99	-99	-99	-99	-99
560	1	3	1	2	España	3	0	0	50.501	0	4	4	4	4	2	2	5	5	4	4	1	4	4	4	5	4	4	3	4	4	4	6	6	7	7	7	4	4	5	5	7.803	11.086	38.674	3	8	4	6	6	3
561	3	2	3	1	España	3	-99	-99	-99	-99	-99	-99	-99	-99	-99	-99	-99	-99	-99	-99	-99	-99	-99	-99	-99	-99	-99	-99	-99	-99	-99	-99	-99	-99	-99	-99	-99	-99	-99	-99	-99	-99	-99	-99	-99	-99	-99	-99	-99
562	3	3	2	1	España	3	-99	-99	-99	-99	-99	-99	-99	-99	-99	-99	-99	-99	-99	-99	-99	-99	-99	-99	-99	-99	-99	-99	-99	-99	-99	-99	-99	-99	-99	-99	-99	-99	-99	-99	-99	-99	-99	-99	-99	-99	-99	-99	-99
564	3	2	3	1	España	3	-99	-99	-99	-99	-99	-99	-99	-99	-99	-99	-99	-99	-99	-99	-99	-99	-99	-99	-99	-99	-99	-99	-99	-99	-99	-99	-99	-99	-99	-99	-99	-99	-99	-99	-99	-99	-99	-99	-99	-99	-99	-99	-99
565	1	3	1	2	España	3	0	0	346.187	0	6	4	7	7	4	7	7	5	7	5	4	4	6	7	7	7	7	5	7	7	7	7	7	6	3	7	2	2	5	5	0	0	277.942	0	4	5	4	4	4
566	2	3	2	1	España	3	-99	-99	-99	-99	-99	-99	-99	-99	-99	-99	-99	-99	-99	-99	-99	-99	-99	-99	-99	-99	-99	-99	-99	-99	-99	-99	-99	-99	-99	-99	-99	-99	-99	-99	-99	-99	-99	-99	-99	-99	-99	-99	-99
569	2	1	2	3	España	3	-99	-99	-99	-99	-99	-99	-99	-99	-99	-99	-99	-99	-99	-99	-99	-99	-99	-99	-99	-99	-99	-99	-99	-99	-99	-99	-99	-99	-99	-99	-99	-99	-99	-99	-99	-99	-99	-99	-99	-99	-99	-99	-99
570	3	2	1	3	España	3	-99	-99	-99	-99	-99	-99	-99	-99	-99	-99	-99	-99	-99	-99	-99	-99	-99	-99	-99	-99	-99	-99	-99	-99	-99	-99	-99	-99	-99	-99	-99	-99	-99	-99	-99	-99	-99	-99	-99	-99	-99	-99	-99
572	2	3	1	2	España	3	-99	-99	-99	-99	-99	-99	-99	-99	-99	-99	-99	-99	-99	-99	-99	-99	-99	-99	-99	-99	-99	-99	-99	-99	-99	-99	-99	-99	-99	-99	-99	-99	-99	-99	-99	-99	-99	-99	-99	-99	-99	-99	-99
573	2	3	2	1	España	3	-99	-99	-99	-99	-99	-99	-99	-99	-99	-99	-99	-99	-99	-99	-99	-99	-99	-99	-99	-99	-99	-99	-99	-99	-99	-99	-99	-99	-99	-99	-99	-99	-99	-99	-99	-99	-99	-99	-99	-99	-99	-99	-99
574	1	3	1	2	España	3	0	0	225.614	0	6	6	5	4	1	5	6	4	5	7	4	4	4	3	7	7	4	1	5	6	6	7	7	7	6	7	5	5	5	3	0	0	287.616	0	8	1	8	8	1
575	2	3	2	1	España	3	-99	-99	-99	-99	-99	-99	-99	-99	-99	-99	-99	-99	-99	-99	-99	-99	-99	-99	-99	-99	-99	-99	-99	-99	-99	-99	-99	-99	-99	-99	-99	-99	-99	-99	-99	-99	-99	-99	-99	-99	-99	-99	-99
577	3	1	2	3	España	3	-99	-99	-99	-99	-99	-99	-99	-99	-99	-99	-99	-99	-99	-99	-99	-99	-99	-99	-99	-99	-99	-99	-99	-99	-99	-99	-99	-99	-99	-99	-99	-99	-99	-99	-99	-99	-99	-99	-99	-99	-99	-99	-99
578	2	3	1	2	España	3	-99	-99	-99	-99	-99	-99	-99	-99	-99	-99	-99	-99	-99	-99	-99	-99	-99	-99	-99	-99	-99	-99	-99	-99	-99	-99	-99	-99	-99	-99	-99	-99	-99	-99	-99	-99	-99	-99	-99	-99	-99	-99	-99
579	3	3	1	2	España	3	-99	-99	-99	-99	-99	-99	-99	-99	-99	-99	-99	-99	-99	-99	-99	-99	-99	-99	-99	-99	-99	-99	-99	-99	-99	-99	-99	-99	-99	-99	-99	-99	-99	-99	-99	-99	-99	-99	-99	-99	-99	-99	-99
580	1	2	1	3	España	3	16.253	16.253	233.951	1	3	4	3	2	1	3	4	2	3	5	1	2	2	5	5	4	4	3	3	4	3	3	4	3	4	4	2	3	2	1	83.888	83.888	289.409	1	5	2	3	2	1
581	1	3	2	1	España	3	0	0	217.758	0	4	1	4	4	4	4	4	3	3	1	1	1	1	1	1	1	1	1	1	1	1	1	7	4	4	4	1	4	3	3	268.422	268.422	274.707	1	6	1	5	5	5
583	1	1	2	3	España	3	0	0	224.435	0	2	2	2	2	2	2	2	1	1	3	2	3	1	3	1	1	2	1	1	3	1	2	3	1	1	1	3	2	2	3	0	0	275.158	0	4	2	5	6	5
584	1	2	1	3	España	3	210.017	210.017	211.739	1	4	2	5	4	2	5	4	4	5	5	3	4	6	6	6	6	4	3	3	4	6	6	6	5	5	5	5	5	5	3	0	0	281.944	0	8	1	8	8	2
585	1	1	3	2	España	3	0	0	15.924	0	3	3	3	3	3	3	3	3	3	4	3	3	3	3	3	3	4	3	3	3	3	3	3	4	4	4	3	4	5	4	0	0	13.529	0	2	2	2	3	3
586	3	3	1	2	España	3	-99	-99	-99	-99	-99	-99	-99	-99	-99	-99	-99	-99	-99	-99	-99	-99	-99	-99	-99	-99	-99	-99	-99	-99	-99	-99	-99	-99	-99	-99	-99	-99	-99	-99	-99	-99	-99	-99	-99	-99	-99	-99	-99
587	3	1	2	3	España	3	-99	-99	-99	-99	-99	-99	-99	-99	-99	-99	-99	-99	-99	-99	-99	-99	-99	-99	-99	-99	-99	-99	-99	-99	-99	-99	-99	-99	-99	-99	-99	-99	-99	-99	-99	-99	-99	-99	-99	-99	-99	-99	-99
588	1	3	1	2	España	3	0	0	217.4	0	5	3	4	4	3	6	6	5	6	6	5	6	6	6	7	7	7	6	7	7	7	7	7	7	6	7	4	5	5	5	0	0	316.403	0	8	1	8	5	1
589	1	2	1	3	España	3	0	0	240.858	0	5	2	2	2	1	4	2	2	5	2	2	2	1	2	6	2	2	1	2	2	6	3	7	6	4	4	2	2	2	2	0	0	278.759	0	8	1	5	6	5
590	3	2	3	1	España	3	-99	-99	-99	-99	-99	-99	-99	-99	-99	-99	-99	-99	-99	-99	-99	-99	-99	-99	-99	-99	-99	-99	-99	-99	-99	-99	-99	-99	-99	-99	-99	-99	-99	-99	-99	-99	-99	-99	-99	-99	-99	-99	-99
591	3	1	3	2	España	3	-99	-99	-99	-99	-99	-99	-99	-99	-99	-99	-99	-99	-99	-99	-99	-99	-99	-99	-99	-99	-99	-99	-99	-99	-99	-99	-99	-99	-99	-99	-99	-99	-99	-99	-99	-99	-99	-99	-99	-99	-99	-99	-99
593	2	3	2	1	España	3	-99	-99	-99	-99	-99	-99	-99	-99	-99	-99	-99	-99	-99	-99	-99	-99	-99	-99	-99	-99	-99	-99	-99	-99	-99	-99	-99	-99	-99	-99	-99	-99	-99	-99	-99	-99	-99	-99	-99	-99	-99	-99	-99
594	1	2	3	1	España	3	0	0	220.446	0	2	2	2	2	1	1	2	2	4	2	2	2	2	1	1	2	1	2	1	2	2	2	3	3	3	4	2	2	2	4	97.758	97.758	270.715	1	3	2	2	3	2
595	1	2	1	3	España	3	0	0	215.702	0	1	2	1	2	1	2	1	1	2	1	1	1	1	1	1	1	1	1	1	1	1	1	3	2	1	2	1	1	1	3	48.296	275.7	276.325	4	5	1	4	5	5
596	3	1	3	2	España	3	-99	-99	-99	-99	-99	-99	-99	-99	-99	-99	-99	-99	-99	-99	-99	-99	-99	-99	-99	-99	-99	-99	-99	-99	-99	-99	-99	-99	-99	-99	-99	-99	-99	-99	-99	-99	-99	-99	-99	-99	-99	-99	-99
597	2	3	1	2	España	3	-99	-99	-99	-99	-99	-99	-99	-99	-99	-99	-99	-99	-99	-99	-99	-99	-99	-99	-99	-99	-99	-99	-99	-99	-99	-99	-99	-99	-99	-99	-99	-99	-99	-99	-99	-99	-99	-99	-99	-99	-99	-99	-99
598	1	2	1	3	España	3	0	0	226.575	0	4	4	4	4	1	3	3	3	3	3	3	3	3	3	3	4	3	3	3	3	5	5	5	5	5	5	1	1	1	1	0	0	269.95	0	4	3	3	3	3
599	2	1	3	2	España	3	-99	-99	-99	-99	-99	-99	-99	-99	-99	-99	-99	-99	-99	-99	-99	-99	-99	-99	-99	-99	-99	-99	-99	-99	-99	-99	-99	-99	-99	-99	-99	-99	-99	-99	-99	-99	-99	-99	-99	-99	-99	-99	-99
600	3	1	3	2	España	3	-99	-99	-99	-99	-99	-99	-99	-99	-99	-99	-99	-99	-99	-99	-99	-99	-99	-99	-99	-99	-99	-99	-99	-99	-99	-99	-99	-99	-99	-99	-99	-99	-99	-99	-99	-99	-99	-99	-99	-99	-99	-99	-99
602	3	2	1	3	España	3	-99	-99	-99	-99	-99	-99	-99	-99	-99	-99	-99	-99	-99	-99	-99	-99	-99	-99	-99	-99	-99	-99	-99	-99	-99	-99	-99	-99	-99	-99	-99	-99	-99	-99	-99	-99	-99	-99	-99	-99	-99	-99	-99
604	1	2	1	3	España	3	0	0	248.775	0	7	1	6	6	2	6	6	6	6	6	2	2	2	2	6	6	6	2	2	6	6	6	6	6	2	2	5	5	5	3	0	0	268.491	0	8	1	8	8	1
605	1	3	2	1	España	3	0	0	229.11	0	4	1	3	3	2	3	3	3	2	3	1	1	1	2	2	3	1	1	1	1	6	6	7	5	3	4	5	5	5	4	0	0	276.131	0	8	1	6	6	2
606	2	3	2	1	España	3	-99	-99	-99	-99	-99	-99	-99	-99	-99	-99	-99	-99	-99	-99	-99	-99	-99	-99	-99	-99	-99	-99	-99	-99	-99	-99	-99	-99	-99	-99	-99	-99	-99	-99	-99	-99	-99	-99	-99	-99	-99	-99	-99
607	3	2	3	1	España	3	-99	-99	-99	-99	-99	-99	-99	-99	-99	-99	-99	-99	-99	-99	-99	-99	-99	-99	-99	-99	-99	-99	-99	-99	-99	-99	-99	-99	-99	-99	-99	-99	-99	-99	-99	-99	-99	-99	-99	-99	-99	-99	-99
608	3	1	3	2	España	3	-99	-99	-99	-99	-99	-99	-99	-99	-99	-99	-99	-99	-99	-99	-99	-99	-99	-99	-99	-99	-99	-99	-99	-99	-99	-99	-99	-99	-99	-99	-99	-99	-99	-99	-99	-99	-99	-99	-99	-99	-99	-99	-99
609	2	1	3	2	España	3	-99	-99	-99	-99	-99	-99	-99	-99	-99	-99	-99	-99	-99	-99	-99	-99	-99	-99	-99	-99	-99	-99	-99	-99	-99	-99	-99	-99	-99	-99	-99	-99	-99	-99	-99	-99	-99	-99	-99	-99	-99	-99	-99
610	1	2	1	3	España	3	0	0	237.307	0	6	3	6	6	3	6	6	6	6	4	3	6	3	6	7	6	6	4	4	6	7	7	7	7	6	7	3	5	5	4	0	0	269.276	0	6	3	6	6	3
613	3	1	3	2	España	3	-99	-99	-99	-99	-99	-99	-99	-99	-99	-99	-99	-99	-99	-99	-99	-99	-99	-99	-99	-99	-99	-99	-99	-99	-99	-99	-99	-99	-99	-99	-99	-99	-99	-99	-99	-99	-99	-99	-99	-99	-99	-99	-99
616	2	1	2	3	España	3	-99	-99	-99	-99	-99	-99	-99	-99	-99	-99	-99	-99	-99	-99	-99	-99	-99	-99	-99	-99	-99	-99	-99	-99	-99	-99	-99	-99	-99	-99	-99	-99	-99	-99	-99	-99	-99	-99	-99	-99	-99	-99	-99
617	2	3	1	2	España	3	-99	-99	-99	-99	-99	-99	-99	-99	-99	-99	-99	-99	-99	-99	-99	-99	-99	-99	-99	-99	-99	-99	-99	-99	-99	-99	-99	-99	-99	-99	-99	-99	-99	-99	-99	-99	-99	-99	-99	-99	-99	-99	-99
619	2	3	2	1	España	3	-99	-99	-99	-99	-99	-99	-99	-99	-99	-99	-99	-99	-99	-99	-99	-99	-99	-99	-99	-99	-99	-99	-99	-99	-99	-99	-99	-99	-99	-99	-99	-99	-99	-99	-99	-99	-99	-99	-99	-99	-99	-99	-99
621	1	3	1	2	España	3	221.413	402.015	406.147	2	5	2	5	5	6	5	6	6	6	5	5	5	3	7	7	5	3	1	3	7	6	4	7	5	4	6	4	4	4	4	3.081	3.856	272.176	2	6	1	6	6	1
622	1	1	3	2	España	3	0	0	218.492	0	3	3	1	2	2	2	1	2	1	1	1	1	1	1	1	2	2	1	1	1	1	1	4	4	3	5	3	3	3	3	0	0	382.864	0	5	1	5	5	5
623	2	3	2	1	España	3	-99	-99	-99	-99	-99	-99	-99	-99	-99	-99	-99	-99	-99	-99	-99	-99	-99	-99	-99	-99	-99	-99	-99	-99	-99	-99	-99	-99	-99	-99	-99	-99	-99	-99	-99	-99	-99	-99	-99	-99	-99	-99	-99
624	2	2	1	3	España	3	-99	-99	-99	-99	-99	-99	-99	-99	-99	-99	-99	-99	-99	-99	-99	-99	-99	-99	-99	-99	-99	-99	-99	-99	-99	-99	-99	-99	-99	-99	-99	-99	-99	-99	-99	-99	-99	-99	-99	-99	-99	-99	-99
626	2	3	1	2	España	3	-99	-99	-99	-99	-99	-99	-99	-99	-99	-99	-99	-99	-99	-99	-99	-99	-99	-99	-99	-99	-99	-99	-99	-99	-99	-99	-99	-99	-99	-99	-99	-99	-99	-99	-99	-99	-99	-99	-99	-99	-99	-99	-99
627	1	2	3	1	España	3	0	0	220.104	0	2	1	2	2	1	1	1	1	1	1	1	1	1	1	1	1	1	1	1	1	1	1	2	2	2	2	1	2	1	2	6.925	247.011	248.191	11	2	2	2	2	1
628	1	3	2	1	España	3	0	0	220.638	0	4	1	4	3	3	3	3	3	3	4	3	3	2	2	2	2	2	1	1	3	3	3	3	5	5	5	2	3	3	3	0	0	322.482	0	6	1	6	8	6
629	1	3	1	2	España	3	221.093	221.093	222.765	1	7	7	7	7	7	7	7	7	7	7	7	7	7	7	7	7	7	7	7	7	7	7	7	7	7	7	5	5	5	5	0	0	274.084	0	8	1	5	8	1
633	1	3	1	2	España	3	0	0	222.531	0	3	5	2	2	2	3	3	2	2	2	2	2	2	2	2	2	2	2	3	2	3	3	3	5	5	5	4	2	1	2	0	0	275.062	0	8	1	4	3	6
636	2	1	2	3	España	3	-99	-99	-99	-99	-99	-99	-99	-99	-99	-99	-99	-99	-99	-99	-99	-99	-99	-99	-99	-99	-99	-99	-99	-99	-99	-99	-99	-99	-99	-99	-99	-99	-99	-99	-99	-99	-99	-99	-99	-99	-99	-99	-99
637	1	2	1	3	España	3	0	0	235.723	0	3	1	1	1	1	1	1	1	1	3	1	1	1	2	1	1	1	1	1	1	2	4	5	2	2	2	4	5	2	1	0	0	284.435	0	8	2	8	4	2
638	1	3	1	2	España	3	0	0	159.003	0	2	4	2	2	3	4	2	2	3	2	2	2	2	2	5	2	2	2	2	2	2	2	4	2	1	2	1	1	1	1	0	0	305.668	0	5	2	5	5	2
639	2	2	3	1	España	3	-99	-99	-99	-99	-99	-99	-99	-99	-99	-99	-99	-99	-99	-99	-99	-99	-99	-99	-99	-99	-99	-99	-99	-99	-99	-99	-99	-99	-99	-99	-99	-99	-99	-99	-99	-99	-99	-99	-99	-99	-99	-99	-99
640	1	1	2	3	España	3	222.036	245.556	246.985	13	6	2	5	5	2	6	6	6	6	6	4	3	5	6	5	5	4	4	4	5	6	5	7	5	5	5	4	4	4	4	0	0	269.782	0	5	3	5	5	3
641	3	1	2	3	España	3	-99	-99	-99	-99	-99	-99	-99	-99	-99	-99	-99	-99	-99	-99	-99	-99	-99	-99	-99	-99	-99	-99	-99	-99	-99	-99	-99	-99	-99	-99	-99	-99	-99	-99	-99	-99	-99	-99	-99	-99	-99	-99	-99
642	1	3	1	2	España	3	12.696	12.696	47.34	1	7	7	7	7	7	7	7	7	7	7	4	7	5	7	7	7	7	7	7	7	7	7	7	7	7	7	5	5	5	5	3.903	72.883	73.766	6	8	8	8	8	3
643	3	2	3	1	España	3	-99	-99	-99	-99	-99	-99	-99	-99	-99	-99	-99	-99	-99	-99	-99	-99	-99	-99	-99	-99	-99	-99	-99	-99	-99	-99	-99	-99	-99	-99	-99	-99	-99	-99	-99	-99	-99	-99	-99	-99	-99	-99	-99
644	2	2	1	3	España	3	-99	-99	-99	-99	-99	-99	-99	-99	-99	-99	-99	-99	-99	-99	-99	-99	-99	-99	-99	-99	-99	-99	-99	-99	-99	-99	-99	-99	-99	-99	-99	-99	-99	-99	-99	-99	-99	-99	-99	-99	-99	-99	-99
646	2	3	2	1	España	3	-99	-99	-99	-99	-99	-99	-99	-99	-99	-99	-99	-99	-99	-99	-99	-99	-99	-99	-99	-99	-99	-99	-99	-99	-99	-99	-99	-99	-99	-99	-99	-99	-99	-99	-99	-99	-99	-99	-99	-99	-99	-99	-99
648	2	3	2	1	España	3	-99	-99	-99	-99	-99	-99	-99	-99	-99	-99	-99	-99	-99	-99	-99	-99	-99	-99	-99	-99	-99	-99	-99	-99	-99	-99	-99	-99	-99	-99	-99	-99	-99	-99	-99	-99	-99	-99	-99	-99	-99	-99	-99
649	2	2	1	3	España	3	-99	-99	-99	-99	-99	-99	-99	-99	-99	-99	-99	-99	-99	-99	-99	-99	-99	-99	-99	-99	-99	-99	-99	-99	-99	-99	-99	-99	-99	-99	-99	-99	-99	-99	-99	-99	-99	-99	-99	-99	-99	-99	-99
650	2	1	3	2	España	3	-99	-99	-99	-99	-99	-99	-99	-99	-99	-99	-99	-99	-99	-99	-99	-99	-99	-99	-99	-99	-99	-99	-99	-99	-99	-99	-99	-99	-99	-99	-99	-99	-99	-99	-99	-99	-99	-99	-99	-99	-99	-99	-99
651	1	2	3	1	España	3	0	0	224.403	0	1	1	1	1	1	1	1	4	1	1	1	3	3	1	2	1	4	2	2	2	2	2	2	2	5	3	5	4	3	5	0	0	269.871	0	8	1	8	8	1
652	1	3	2	1	España	3	0	0	216.056	0	2	5	6	5	1	1	1	1	1	1	5	1	5	5	1	1	5	3	1	6	5	6	6	1	1	1	4	2	4	4	0	0	270.962	0	5	1	5	3	1
653	3	1	2	3	España	3	-99	-99	-99	-99	-99	-99	-99	-99	-99	-99	-99	-99	-99	-99	-99	-99	-99	-99	-99	-99	-99	-99	-99	-99	-99	-99	-99	-99	-99	-99	-99	-99	-99	-99	-99	-99	-99	-99	-99	-99	-99	-99	-99
654	1	3	1	2	España	3	0	0	6.642	0	5	2	4	2	1	6	7	5	5	5	1	1	3	5	6	6	4	4	1	4	4	6	7	7	5	7	2	5	5	4	0	0	273.525	0	3	5	8	5	2
655	1	1	2	3	España	3	5.542	223.448	225.189	2	7	1	6	6	1	6	6	6	2	3	1	2	2	7	7	1	1	1	1	1	7	4	7	7	1	7	4	4	5	5	0	0	317.141	0	8	8	8	8	1
658	3	3	1	2	España	3	-99	-99	-99	-99	-99	-99	-99	-99	-99	-99	-99	-99	-99	-99	-99	-99	-99	-99	-99	-99	-99	-99	-99	-99	-99	-99	-99	-99	-99	-99	-99	-99	-99	-99	-99	-99	-99	-99	-99	-99	-99	-99	-99
659	3	1	3	2	España	3	-99	-99	-99	-99	-99	-99	-99	-99	-99	-99	-99	-99	-99	-99	-99	-99	-99	-99	-99	-99	-99	-99	-99	-99	-99	-99	-99	-99	-99	-99	-99	-99	-99	-99	-99	-99	-99	-99	-99	-99	-99	-99	-99
660	2	1	2	3	España	3	-99	-99	-99	-99	-99	-99	-99	-99	-99	-99	-99	-99	-99	-99	-99	-99	-99	-99	-99	-99	-99	-99	-99	-99	-99	-99	-99	-99	-99	-99	-99	-99	-99	-99	-99	-99	-99	-99	-99	-99	-99	-99	-99
662	3	2	3	1	España	3	-99	-99	-99	-99	-99	-99	-99	-99	-99	-99	-99	-99	-99	-99	-99	-99	-99	-99	-99	-99	-99	-99	-99	-99	-99	-99	-99	-99	-99	-99	-99	-99	-99	-99	-99	-99	-99	-99	-99	-99	-99	-99	-99
663	1	2	1	3	España	3	0	0	228.363	0	7	4	6	5	1	7	7	7	5	4	1	1	5	7	4	1	1	4	5	6	7	4	7	7	7	7	1	3	5	5	0	0	276.435	0	3	3	3	1	1
664	1	1	2	3	España	3	23.948	226.092	236.327	3	4	2	3	2	2	3	3	2	4	4	2	2	2	3	4	3	2	2	2	3	4	6	7	6	2	6	4	3	3	3	0	0	1072.54	0	6	2	8	6	4
666	3	1	3	2	España	3	-99	-99	-99	-99	-99	-99	-99	-99	-99	-99	-99	-99	-99	-99	-99	-99	-99	-99	-99	-99	-99	-99	-99	-99	-99	-99	-99	-99	-99	-99	-99	-99	-99	-99	-99	-99	-99	-99	-99	-99	-99	-99	-99
667	1	2	1	3	España	3	219.734	219.734	221.302	1	3	7	3	2	1	2	2	1	2	1	1	1	1	1	2	2	1	1	1	1	2	5	4	4	3	4	3	5	5	5	0	0	279.045	0	8	3	8	5	8
669	2	3	1	2	España	3	-99	-99	-99	-99	-99	-99	-99	-99	-99	-99	-99	-99	-99	-99	-99	-99	-99	-99	-99	-99	-99	-99	-99	-99	-99	-99	-99	-99	-99	-99	-99	-99	-99	-99	-99	-99	-99	-99	-99	-99	-99	-99	-99
670	3	3	1	2	España	3	-99	-99	-99	-99	-99	-99	-99	-99	-99	-99	-99	-99	-99	-99	-99	-99	-99	-99	-99	-99	-99	-99	-99	-99	-99	-99	-99	-99	-99	-99	-99	-99	-99	-99	-99	-99	-99	-99	-99	-99	-99	-99	-99
671	2	3	1	2	España	3	-99	-99	-99	-99	-99	-99	-99	-99	-99	-99	-99	-99	-99	-99	-99	-99	-99	-99	-99	-99	-99	-99	-99	-99	-99	-99	-99	-99	-99	-99	-99	-99	-99	-99	-99	-99	-99	-99	-99	-99	-99	-99	-99
672	2	1	2	3	España	3	-99	-99	-99	-99	-99	-99	-99	-99	-99	-99	-99	-99	-99	-99	-99	-99	-99	-99	-99	-99	-99	-99	-99	-99	-99	-99	-99	-99	-99	-99	-99	-99	-99	-99	-99	-99	-99	-99	-99	-99	-99	-99	-99
673	2	3	1	2	España	3	-99	-99	-99	-99	-99	-99	-99	-99	-99	-99	-99	-99	-99	-99	-99	-99	-99	-99	-99	-99	-99	-99	-99	-99	-99	-99	-99	-99	-99	-99	-99	-99	-99	-99	-99	-99	-99	-99	-99	-99	-99	-99	-99
674	2	1	3	2	España	3	-99	-99	-99	-99	-99	-99	-99	-99	-99	-99	-99	-99	-99	-99	-99	-99	-99	-99	-99	-99	-99	-99	-99	-99	-99	-99	-99	-99	-99	-99	-99	-99	-99	-99	-99	-99	-99	-99	-99	-99	-99	-99	-99
675	1	1	2	3	España	3	219.964	231.051	232.696	2	2	2	2	2	2	2	2	2	2	2	2	2	2	2	2	3	3	3	3	2	2	5	5	4	2	4	3	5	5	4	0	0	216.591	0	4	3	5	5	4
676	2	1	3	2	España	3	-99	-99	-99	-99	-99	-99	-99	-99	-99	-99	-99	-99	-99	-99	-99	-99	-99	-99	-99	-99	-99	-99	-99	-99	-99	-99	-99	-99	-99	-99	-99	-99	-99	-99	-99	-99	-99	-99	-99	-99	-99	-99	-99
677	2	3	1	2	España	3	-99	-99	-99	-99	-99	-99	-99	-99	-99	-99	-99	-99	-99	-99	-99	-99	-99	-99	-99	-99	-99	-99	-99	-99	-99	-99	-99	-99	-99	-99	-99	-99	-99	-99	-99	-99	-99	-99	-99	-99	-99	-99	-99
678	3	2	1	3	España	3	-99	-99	-99	-99	-99	-99	-99	-99	-99	-99	-99	-99	-99	-99	-99	-99	-99	-99	-99	-99	-99	-99	-99	-99	-99	-99	-99	-99	-99	-99	-99	-99	-99	-99	-99	-99	-99	-99	-99	-99	-99	-99	-99
680	2	1	2	3	España	3	-99	-99	-99	-99	-99	-99	-99	-99	-99	-99	-99	-99	-99	-99	-99	-99	-99	-99	-99	-99	-99	-99	-99	-99	-99	-99	-99	-99	-99	-99	-99	-99	-99	-99	-99	-99	-99	-99	-99	-99	-99	-99	-99
681	3	3	1	2	España	3	-99	-99	-99	-99	-99	-99	-99	-99	-99	-99	-99	-99	-99	-99	-99	-99	-99	-99	-99	-99	-99	-99	-99	-99	-99	-99	-99	-99	-99	-99	-99	-99	-99	-99	-99	-99	-99	-99	-99	-99	-99	-99	-99
682	2	3	2	1	España	3	-99	-99	-99	-99	-99	-99	-99	-99	-99	-99	-99	-99	-99	-99	-99	-99	-99	-99	-99	-99	-99	-99	-99	-99	-99	-99	-99	-99	-99	-99	-99	-99	-99	-99	-99	-99	-99	-99	-99	-99	-99	-99	-99
684	1	2	1	3	España	3	0	0	219.789	0	6	4	6	5	5	5	6	5	5	6	4	5	4	6	5	5	6	6	6	6	5	6	6	6	5	6	4	4	4	4	0	0	286.039	0	5	3	5	5	5
685	2	1	3	2	España	3	-99	-99	-99	-99	-99	-99	-99	-99	-99	-99	-99	-99	-99	-99	-99	-99	-99	-99	-99	-99	-99	-99	-99	-99	-99	-99	-99	-99	-99	-99	-99	-99	-99	-99	-99	-99	-99	-99	-99	-99	-99	-99	-99
686	1	1	3	2	España	3	0	0	52.689	0	4	2	1	1	1	3	3	1	1	4	1	1	1	4	3	2	1	2	1	1	4	4	6	4	2	4	4	3	4	2	0	0	8.511	0	3	2	2	2	2
688	2	1	3	2	España	3	-99	-99	-99	-99	-99	-99	-99	-99	-99	-99	-99	-99	-99	-99	-99	-99	-99	-99	-99	-99	-99	-99	-99	-99	-99	-99	-99	-99	-99	-99	-99	-99	-99	-99	-99	-99	-99	-99	-99	-99	-99	-99	-99
690	3	3	1	2	España	3	-99	-99	-99	-99	-99	-99	-99	-99	-99	-99	-99	-99	-99	-99	-99	-99	-99	-99	-99	-99	-99	-99	-99	-99	-99	-99	-99	-99	-99	-99	-99	-99	-99	-99	-99	-99	-99	-99	-99	-99	-99	-99	-99
691	1	1	3	2	España	3	0	0	141.554	0	7	5	5	5	6	6	6	6	6	6	6	6	4	6	7	7	2	2	1	1	7	1	4	7	1	5	2	2	2	2	0	0	264.602	0	8	8	8	8	8
692	1	3	1	2	España	3	0	0	2.616	0	6	4	6	4	3	3	4	5	6	7	2	3	2	3	2	2	6	1	4	5	7	7	7	5	5	4	4	5	5	5	0	0	3.489	0	5	8	5	5	5
693	2	1	3	2	España	3	-99	-99	-99	-99	-99	-99	-99	-99	-99	-99	-99	-99	-99	-99	-99	-99	-99	-99	-99	-99	-99	-99	-99	-99	-99	-99	-99	-99	-99	-99	-99	-99	-99	-99	-99	-99	-99	-99	-99	-99	-99	-99	-99
694	1	2	1	3	España	3	313.784	313.784	316.591	1	7	1	7	7	4	7	7	7	7	7	1	4	7	7	4	4	7	7	7	7	7	7	7	7	4	3	3	2	3	1	0	0	306.186	0	8	1	8	8	8
568	3	3	2	1	España	3	-99	-99	-99	-99	-99	-99	-99	-99	-99	-99	-99	-99	-99	-99	-99	-99	-99	-99	-99	-99	-99	-99	-99	-99	-99	-99	-99	-99	-99	-99	-99	-99	-99	-99	-99	-99	-99	-99	-99	-99	-99	-99	-99
229	3	1	3	2	España	3	-99	-99	-99	-99	-99	-99	-99	-99	-99	-99	-99	-99	-99	-99	-99	-99	-99	-99	-99	-99	-99	-99	-99	-99	-99	-99	-99	-99	-99	-99	-99	-99	-99	-99	-99	-99	-99	-99	-99	-99	-99	-99	-99
192	2	2	1	3	Quito	2	-99	-99	-99	-99	-99	-99	-99	-99	-99	-99	-99	-99	-99	-99	-99	-99	-99	-99	-99	-99	-99	-99	-99	-99	-99	-99	-99	-99	-99	-99	-99	-99	-99	-99	-99	-99	-99	-99	-99	-99	-99	-99	-99
635	1	3	1	2	España	3	0	0	695.104	0	7	1	2	4	6	7	7	7	7	2	1	1	2	1	7	7	2	1	3	2	7	7	7	4	5	5	4	4	2	2	0	0	271.093	0	8	3	4	5	6
368	3	3	1	2	España	3	-99	-99	-99	-99	-99	-99	-99	-99	-99	-99	-99	-99	-99	-99	-99	-99	-99	-99	-99	-99	-99	-99	-99	-99	-99	-99	-99	-99	-99	-99	-99	-99	-99	-99	-99	-99	-99	-99	-99	-99	-99	-99	-99
224	1	2	1	3	España	3	0	0	215.878	0	4	4	4	3	3	3	3	3	3	4	3	3	3	3	3	3	3	3	4	6	6	6	6	6	6	6	4	4	4	4	0	0	278.113	0	6	4	6	6	5
2	1	1	2	3	Gasteiz	1	0	0	228.24	0	6	5	5	4	4	6	7	6	5	7	3	4	5	7	7	7	4	5	5	6	6	6	5	5	6	6	5	5	5	5	0	0	273.282	0	6	1	5	4	4
68	2	3	2	1	Gasteiz	1	-99	-99	-99	-99	-99	-99	-99	-99	-99	-99	-99	-99	-99	-99	-99	-99	-99	-99	-99	-99	-99	-99	-99	-99	-99	-99	-99	-99	-99	-99	-99	-99	-99	-99	-99	-99	-99	-99	-99	-99	-99	-99	-99
382	1	3	1	2	España	3	0	0	218.854	0	6	5	6	6	6	6	6	6	6	6	4	4	4	7	7	7	7	7	7	7	7	7	7	6	6	6	3	3	3	3	0	0	271.2	0	6	2	6	6	6
275	3	1	2	3	España	3	-99	-99	-99	-99	-99	-99	-99	-99	-99	-99	-99	-99	-99	-99	-99	-99	-99	-99	-99	-99	-99	-99	-99	-99	-99	-99	-99	-99	-99	-99	-99	-99	-99	-99	-99	-99	-99	-99	-99	-99	-99	-99	-99
281	2	3	1	2	Quito	2	-99	-99	-99	-99	-99	-99	-99	-99	-99	-99	-99	-99	-99	-99	-99	-99	-99	-99	-99	-99	-99	-99	-99	-99	-99	-99	-99	-99	-99	-99	-99	-99	-99	-99	-99	-99	-99	-99	-99	-99	-99	-99	-99
239	3	2	3	1	Quito	2	-99	-99	-99	-99	-99	-99	-99	-99	-99	-99	-99	-99	-99	-99	-99	-99	-99	-99	-99	-99	-99	-99	-99	-99	-99	-99	-99	-99	-99	-99	-99	-99	-99	-99	-99	-99	-99	-99	-99	-99	-99	-99	-99
532	3	3	1	2	España	3	-99	-99	-99	-99	-99	-99	-99	-99	-99	-99	-99	-99	-99	-99	-99	-99	-99	-99	-99	-99	-99	-99	-99	-99	-99	-99	-99	-99	-99	-99	-99	-99	-99	-99	-99	-99	-99	-99	-99	-99	-99	-99	-99
87	3	1	3	2	Gasteiz	1	-99	-99	-99	-99	-99	-99	-99	-99	-99	-99	-99	-99	-99	-99	-99	-99	-99	-99	-99	-99	-99	-99	-99	-99	-99	-99	-99	-99	-99	-99	-99	-99	-99	-99	-99	-99	-99	-99	-99	-99	-99	-99	-99
280	1	3	2	1	España	3	0	0	220.96	0	4	4	3	1	4	4	2	2	2	1	1	1	1	5	1	1	3	1	1	4	1	2	6	1	1	1	5	5	5	5	0	0	276.15	0	6	1	5	8	1
190	3	1	2	3	España	3	-99	-99	-99	-99	-99	-99	-99	-99	-99	-99	-99	-99	-99	-99	-99	-99	-99	-99	-99	-99	-99	-99	-99	-99	-99	-99	-99	-99	-99	-99	-99	-99	-99	-99	-99	-99	-99	-99	-99	-99	-99	-99	-99
615	3	3	2	1	España	3	-99	-99	-99	-99	-99	-99	-99	-99	-99	-99	-99	-99	-99	-99	-99	-99	-99	-99	-99	-99	-99	-99	-99	-99	-99	-99	-99	-99	-99	-99	-99	-99	-99	-99	-99	-99	-99	-99	-99	-99	-99	-99	-99
322	2	3	2	1	Quito	2	-99	-99	-99	-99	-99	-99	-99	-99	-99	-99	-99	-99	-99	-99	-99	-99	-99	-99	-99	-99	-99	-99	-99	-99	-99	-99	-99	-99	-99	-99	-99	-99	-99	-99	-99	-99	-99	-99	-99	-99	-99	-99	-99
51	3	1	2	3	España	3	-99	-99	-99	-99	-99	-99	-99	-99	-99	-99	-99	-99	-99	-99	-99	-99	-99	-99	-99	-99	-99	-99	-99	-99	-99	-99	-99	-99	-99	-99	-99	-99	-99	-99	-99	-99	-99	-99	-99	-99	-99	-99	-99
320	2	3	1	2	España	3	-99	-99	-99	-99	-99	-99	-99	-99	-99	-99	-99	-99	-99	-99	-99	-99	-99	-99	-99	-99	-99	-99	-99	-99	-99	-99	-99	-99	-99	-99	-99	-99	-99	-99	-99	-99	-99	-99	-99	-99	-99	-99	-99
634	2	1	3	2	España	3	-99	-99	-99	-99	-99	-99	-99	-99	-99	-99	-99	-99	-99	-99	-99	-99	-99	-99	-99	-99	-99	-99	-99	-99	-99	-99	-99	-99	-99	-99	-99	-99	-99	-99	-99	-99	-99	-99	-99	-99	-99	-99	-99
117	1	1	2	3	España	3	0	0	238.482	0	4	1	3	3	1	3	2	4	3	3	1	3	1	1	1	3	1	1	1	1	3	3	7	1	1	7	4	3	4	4	0	0	267.353	0	5	4	3	3	1
191	1	1	2	3	Quito	2	0	0	234.77	0	4	2	3	3	3	5	5	5	7	4	2	3	1	4	5	6	4	1	7	4	5	7	7	5	6	7	4	5	4	5	0	0	267.404	0	4	2	5	6	1
151	2	3	1	2	Quito	2	-99	-99	-99	-99	-99	-99	-99	-99	-99	-99	-99	-99	-99	-99	-99	-99	-99	-99	-99	-99	-99	-99	-99	-99	-99	-99	-99	-99	-99	-99	-99	-99	-99	-99	-99	-99	-99	-99	-99	-99	-99	-99	-99
227	1	3	2	1	Quito	2	0	0	216.929	0	1	1	1	1	1	1	1	2	1	1	1	1	1	1	1	1	1	1	1	1	4	5	5	4	5	5	3	4	4	5	0	0	169.31	0	4	1	2	2	2
105	2	3	2	1	España	3	-99	-99	-99	-99	-99	-99	-99	-99	-99	-99	-99	-99	-99	-99	-99	-99	-99	-99	-99	-99	-99	-99	-99	-99	-99	-99	-99	-99	-99	-99	-99	-99	-99	-99	-99	-99	-99	-99	-99	-99	-99	-99	-99
178	2	2	3	1	España	3	-99	-99	-99	-99	-99	-99	-99	-99	-99	-99	-99	-99	-99	-99	-99	-99	-99	-99	-99	-99	-99	-99	-99	-99	-99	-99	-99	-99	-99	-99	-99	-99	-99	-99	-99	-99	-99	-99	-99	-99	-99	-99	-99
82	3	1	2	3	Gasteiz	1	-99	-99	-99	-99	-99	-99	-99	-99	-99	-99	-99	-99	-99	-99	-99	-99	-99	-99	-99	-99	-99	-99	-99	-99	-99	-99	-99	-99	-99	-99	-99	-99	-99	-99	-99	-99	-99	-99	-99	-99	-99	-99	-99
234	2	1	3	2	Quito	2	-99	-99	-99	-99	-99	-99	-99	-99	-99	-99	-99	-99	-99	-99	-99	-99	-99	-99	-99	-99	-99	-99	-99	-99	-99	-99	-99	-99	-99	-99	-99	-99	-99	-99	-99	-99	-99	-99	-99	-99	-99	-99	-99
422	3	1	2	3	Quito	2	-99	-99	-99	-99	-99	-99	-99	-99	-99	-99	-99	-99	-99	-99	-99	-99	-99	-99	-99	-99	-99	-99	-99	-99	-99	-99	-99	-99	-99	-99	-99	-99	-99	-99	-99	-99	-99	-99	-99	-99	-99	-99	-99
50	1	2	3	1	España	3	0	0	28.64	0	1	1	1	1	1	1	1	1	1	2	1	1	2	1	1	2	2	1	1	2	2	1	1	2	2	1	3	5	5	5	0	0	9.187	0	4	4	5	5	6
231	1	1	3	2	España	3	247.404	247.404	260.236	1	5	5	7	6	3	7	7	7	7	7	3	2	1	6	6	2	3	1	1	5	4	6	6	5	6	5	5	5	5	3	0	0	272.458	0	8	6	8	8	8
436	3	3	1	2	España	3	-99	-99	-99	-99	-99	-99	-99	-99	-99	-99	-99	-99	-99	-99	-99	-99	-99	-99	-99	-99	-99	-99	-99	-99	-99	-99	-99	-99	-99	-99	-99	-99	-99	-99	-99	-99	-99	-99	-99	-99	-99	-99	-99
113	2	3	1	2	España	3	-99	-99	-99	-99	-99	-99	-99	-99	-99	-99	-99	-99	-99	-99	-99	-99	-99	-99	-99	-99	-99	-99	-99	-99	-99	-99	-99	-99	-99	-99	-99	-99	-99	-99	-99	-99	-99	-99	-99	-99	-99	-99	-99
313	3	2	3	1	España	3	-99	-99	-99	-99	-99	-99	-99	-99	-99	-99	-99	-99	-99	-99	-99	-99	-99	-99	-99	-99	-99	-99	-99	-99	-99	-99	-99	-99	-99	-99	-99	-99	-99	-99	-99	-99	-99	-99	-99	-99	-99	-99	-99
541	1	3	1	2	España	3	0	0	222.835	0	4	1	4	3	1	4	4	2	4	4	1	2	3	2	3	3	3	1	3	4	4	3	7	7	7	7	4	4	4	4	0	0	276.634	0	5	2	5	5	2
228	2	1	3	2	Quito	2	-99	-99	-99	-99	-99	-99	-99	-99	-99	-99	-99	-99	-99	-99	-99	-99	-99	-99	-99	-99	-99	-99	-99	-99	-99	-99	-99	-99	-99	-99	-99	-99	-99	-99	-99	-99	-99	-99	-99	-99	-99	-99	-99
10	2	1	2	3	Gasteiz	1	-99	-99	-99	-99	-99	-99	-99	-99	-99	-99	-99	-99	-99	-99	-99	-99	-99	-99	-99	-99	-99	-99	-99	-99	-99	-99	-99	-99	-99	-99	-99	-99	-99	-99	-99	-99	-99	-99	-99	-99	-99	-99	-99
4	3	1	2	3	España	3	-99	-99	-99	-99	-99	-99	-99	-99	-99	-99	-99	-99	-99	-99	-99	-99	-99	-99	-99	-99	-99	-99	-99	-99	-99	-99	-99	-99	-99	-99	-99	-99	-99	-99	-99	-99	-99	-99	-99	-99	-99	-99	-99
351	3	2	3	1	España	3	-99	-99	-99	-99	-99	-99	-99	-99	-99	-99	-99	-99	-99	-99	-99	-99	-99	-99	-99	-99	-99	-99	-99	-99	-99	-99	-99	-99	-99	-99	-99	-99	-99	-99	-99	-99	-99	-99	-99	-99	-99	-99	-99
188	2	2	1	3	España	3	-99	-99	-99	-99	-99	-99	-99	-99	-99	-99	-99	-99	-99	-99	-99	-99	-99	-99	-99	-99	-99	-99	-99	-99	-99	-99	-99	-99	-99	-99	-99	-99	-99	-99	-99	-99	-99	-99	-99	-99	-99	-99	-99
421	1	3	1	2	Quito	2	0	0	150.799	0	3	6	2	2	4	3	3	3	4	3	3	3	3	5	3	3	2	2	2	2	5	5	5	6	4	4	2	4	3	4	19.227	19.227	268.007	1	5	1	5	4	4
189	1	1	2	3	Quito	2	0	0	345.667	0	3	7	5	3	4	4	5	4	5	3	1	4	1	5	3	3	1	5	5	2	4	2	5	3	3	4	4	3	3	3	0	0	267.539	0	6	3	6	7	4
44	3	3	1	2	España	3	-99	-99	-99	-99	-99	-99	-99	-99	-99	-99	-99	-99	-99	-99	-99	-99	-99	-99	-99	-99	-99	-99	-99	-99	-99	-99	-99	-99	-99	-99	-99	-99	-99	-99	-99	-99	-99	-99	-99	-99	-99	-99	-99
363	1	3	1	2	Quito	2	216.184	216.184	217.377	1	5	5	5	5	5	5	6	6	4	7	1	1	1	1	6	6	6	1	1	7	7	1	1	1	5	5	1	5	5	5	0	0	261.691	0	5	4	5	5	5
438	3	3	2	1	España	3	-99	-99	-99	-99	-99	-99	-99	-99	-99	-99	-99	-99	-99	-99	-99	-99	-99	-99	-99	-99	-99	-99	-99	-99	-99	-99	-99	-99	-99	-99	-99	-99	-99	-99	-99	-99	-99	-99	-99	-99	-99	-99	-99
96	3	1	2	3	España	3	-99	-99	-99	-99	-99	-99	-99	-99	-99	-99	-99	-99	-99	-99	-99	-99	-99	-99	-99	-99	-99	-99	-99	-99	-99	-99	-99	-99	-99	-99	-99	-99	-99	-99	-99	-99	-99	-99	-99	-99	-99	-99	-99
451	3	3	1	2	España	3	-99	-99	-99	-99	-99	-99	-99	-99	-99	-99	-99	-99	-99	-99	-99	-99	-99	-99	-99	-99	-99	-99	-99	-99	-99	-99	-99	-99	-99	-99	-99	-99	-99	-99	-99	-99	-99	-99	-99	-99	-99	-99	-99
495	1	1	2	3	España	3	38.666	38.666	38.77	1	3	3	3	3	3	3	3	3	3	3	3	3	3	6	5	3	3	3	3	3	4	3	5	3	3	3	3	3	3	3	0	0	56.766	0	3	3	4	4	3
237	1	3	2	1	Quito	2	0	0	230.009	0	5	4	5	4	5	5	5	5	5	3	5	4	5	5	5	5	4	4	4	5	5	5	5	4	2	2	2	2	4	4	0	0	266.372	0	4	4	4	4	4
175	1	1	2	3	España	3	230.037	230.037	231.49	1	2	2	2	2	2	2	2	2	2	5	2	2	2	5	5	3	2	1	1	2	2	6	6	3	4	4	3	5	4	4	0	0	409.289	0	5	1	3	4	4
229	1	1	2	3	Quito	2	164.115	164.115	219.102	1	5	5	3	3	5	4	4	5	5	3	2	3	3	6	6	4	4	3	4	4	5	6	7	7	1	2	4	5	5	4	0	0	270.86	0	5	4	5	5	5
235	3	1	2	3	España	3	-99	-99	-99	-99	-99	-99	-99	-99	-99	-99	-99	-99	-99	-99	-99	-99	-99	-99	-99	-99	-99	-99	-99	-99	-99	-99	-99	-99	-99	-99	-99	-99	-99	-99	-99	-99	-99	-99	-99	-99	-99	-99	-99
419	2	1	2	3	Quito	2	-99	-99	-99	-99	-99	-99	-99	-99	-99	-99	-99	-99	-99	-99	-99	-99	-99	-99	-99	-99	-99	-99	-99	-99	-99	-99	-99	-99	-99	-99	-99	-99	-99	-99	-99	-99	-99	-99	-99	-99	-99	-99	-99
679	2	1	2	3	España	3	-99	-99	-99	-99	-99	-99	-99	-99	-99	-99	-99	-99	-99	-99	-99	-99	-99	-99	-99	-99	-99	-99	-99	-99	-99	-99	-99	-99	-99	-99	-99	-99	-99	-99	-99	-99	-99	-99	-99	-99	-99	-99	-99
227	1	2	3	1	España	3	0	0	218.811	0	2	2	2	2	2	3	2	2	2	2	2	2	2	3	3	2	2	2	3	3	3	3	3	4	4	4	2	2	2	2	0	0	268.895	0	4	5	4	5	4
107	2	2	3	1	España	3	-99	-99	-99	-99	-99	-99	-99	-99	-99	-99	-99	-99	-99	-99	-99	-99	-99	-99	-99	-99	-99	-99	-99	-99	-99	-99	-99	-99	-99	-99	-99	-99	-99	-99	-99	-99	-99	-99	-99	-99	-99	-99	-99
356	3	2	1	3	España	3	-99	-99	-99	-99	-99	-99	-99	-99	-99	-99	-99	-99	-99	-99	-99	-99	-99	-99	-99	-99	-99	-99	-99	-99	-99	-99	-99	-99	-99	-99	-99	-99	-99	-99	-99	-99	-99	-99	-99	-99	-99	-99	-99
402	3	1	2	3	Quito	2	-99	-99	-99	-99	-99	-99	-99	-99	-99	-99	-99	-99	-99	-99	-99	-99	-99	-99	-99	-99	-99	-99	-99	-99	-99	-99	-99	-99	-99	-99	-99	-99	-99	-99	-99	-99	-99	-99	-99	-99	-99	-99	-99
204	3	2	3	1	Quito	2	-99	-99	-99	-99	-99	-99	-99	-99	-99	-99	-99	-99	-99	-99	-99	-99	-99	-99	-99	-99	-99	-99	-99	-99	-99	-99	-99	-99	-99	-99	-99	-99	-99	-99	-99	-99	-99	-99	-99	-99	-99	-99	-99
315	3	3	2	1	Quito	2	-99	-99	-99	-99	-99	-99	-99	-99	-99	-99	-99	-99	-99	-99	-99	-99	-99	-99	-99	-99	-99	-99	-99	-99	-99	-99	-99	-99	-99	-99	-99	-99	-99	-99	-99	-99	-99	-99	-99	-99	-99	-99	-99
223	3	3	1	2	Quito	2	-99	-99	-99	-99	-99	-99	-99	-99	-99	-99	-99	-99	-99	-99	-99	-99	-99	-99	-99	-99	-99	-99	-99	-99	-99	-99	-99	-99	-99	-99	-99	-99	-99	-99	-99	-99	-99	-99	-99	-99	-99	-99	-99
488	3	3	2	1	España	3	-99	-99	-99	-99	-99	-99	-99	-99	-99	-99	-99	-99	-99	-99	-99	-99	-99	-99	-99	-99	-99	-99	-99	-99	-99	-99	-99	-99	-99	-99	-99	-99	-99	-99	-99	-99	-99	-99	-99	-99	-99	-99	-99
349	2	2	3	1	Quito	2	-99	-99	-99	-99	-99	-99	-99	-99	-99	-99	-99	-99	-99	-99	-99	-99	-99	-99	-99	-99	-99	-99	-99	-99	-99	-99	-99	-99	-99	-99	-99	-99	-99	-99	-99	-99	-99	-99	-99	-99	-99	-99	-99
645	2	3	2	1	España	3	-99	-99	-99	-99	-99	-99	-99	-99	-99	-99	-99	-99	-99	-99	-99	-99	-99	-99	-99	-99	-99	-99	-99	-99	-99	-99	-99	-99	-99	-99	-99	-99	-99	-99	-99	-99	-99	-99	-99	-99	-99	-99	-99
289	3	2	3	1	Quito	2	-99	-99	-99	-99	-99	-99	-99	-99	-99	-99	-99	-99	-99	-99	-99	-99	-99	-99	-99	-99	-99	-99	-99	-99	-99	-99	-99	-99	-99	-99	-99	-99	-99	-99	-99	-99	-99	-99	-99	-99	-99	-99	-99
510	3	3	1	2	España	3	-99	-99	-99	-99	-99	-99	-99	-99	-99	-99	-99	-99	-99	-99	-99	-99	-99	-99	-99	-99	-99	-99	-99	-99	-99	-99	-99	-99	-99	-99	-99	-99	-99	-99	-99	-99	-99	-99	-99	-99	-99	-99	-99
174	2	3	1	2	Quito	2	-99	-99	-99	-99	-99	-99	-99	-99	-99	-99	-99	-99	-99	-99	-99	-99	-99	-99	-99	-99	-99	-99	-99	-99	-99	-99	-99	-99	-99	-99	-99	-99	-99	-99	-99	-99	-99	-99	-99	-99	-99	-99	-99
139	1	1	3	2	Quito	2	0	0	312.001	0	7	1	7	7	1	7	7	7	1	7	1	1	7	4	7	7	7	1	4	7	7	7	7	7	7	7	5	5	5	5	0	0	209.677	0	7	7	7	7	7
384	2	3	1	2	España	3	-99	-99	-99	-99	-99	-99	-99	-99	-99	-99	-99	-99	-99	-99	-99	-99	-99	-99	-99	-99	-99	-99	-99	-99	-99	-99	-99	-99	-99	-99	-99	-99	-99	-99	-99	-99	-99	-99	-99	-99	-99	-99	-99
273	1	1	3	2	España	3	39.577	39.577	190.02	1	5	2	4	4	5	6	6	5	6	5	1	3	4	6	4	5	4	2	3	3	4	6	6	2	4	5	4	5	3	5	0	0	267.824	0	5	6	8	8	8
518	1	2	3	1	España	3	20.057	20.23	221.691	4	7	6	5	5	6	6	7	6	5	6	4	3	3	5	5	5	2	1	4	4	5	6	5	2	1	3	3	4	4	4	0	0	291.006	0	8	1	8	8	6
143	3	3	2	1	Quito	2	-99	-99	-99	-99	-99	-99	-99	-99	-99	-99	-99	-99	-99	-99	-99	-99	-99	-99	-99	-99	-99	-99	-99	-99	-99	-99	-99	-99	-99	-99	-99	-99	-99	-99	-99	-99	-99	-99	-99	-99	-99	-99	-99
154	1	2	3	1	Quito	2	0	0	220.504	0	6	5	5	6	1	6	7	6	7	6	1	6	1	1	7	7	7	6	7	3	6	6	7	6	6	5	3	4	4	5	0	0	269.856	0	5	3	5	7	1
348	2	2	3	1	Quito	2	-99	-99	-99	-99	-99	-99	-99	-99	-99	-99	-99	-99	-99	-99	-99	-99	-99	-99	-99	-99	-99	-99	-99	-99	-99	-99	-99	-99	-99	-99	-99	-99	-99	-99	-99	-99	-99	-99	-99	-99	-99	-99	-99
473	2	2	3	1	España	3	-99	-99	-99	-99	-99	-99	-99	-99	-99	-99	-99	-99	-99	-99	-99	-99	-99	-99	-99	-99	-99	-99	-99	-99	-99	-99	-99	-99	-99	-99	-99	-99	-99	-99	-99	-99	-99	-99	-99	-99	-99	-99	-99
405	2	2	1	3	España	3	-99	-99	-99	-99	-99	-99	-99	-99	-99	-99	-99	-99	-99	-99	-99	-99	-99	-99	-99	-99	-99	-99	-99	-99	-99	-99	-99	-99	-99	-99	-99	-99	-99	-99	-99	-99	-99	-99	-99	-99	-99	-99	-99
93	3	1	3	2	España	3	-99	-99	-99	-99	-99	-99	-99	-99	-99	-99	-99	-99	-99	-99	-99	-99	-99	-99	-99	-99	-99	-99	-99	-99	-99	-99	-99	-99	-99	-99	-99	-99	-99	-99	-99	-99	-99	-99	-99	-99	-99	-99	-99
320	2	2	3	1	Quito	2	-99	-99	-99	-99	-99	-99	-99	-99	-99	-99	-99	-99	-99	-99	-99	-99	-99	-99	-99	-99	-99	-99	-99	-99	-99	-99	-99	-99	-99	-99	-99	-99	-99	-99	-99	-99	-99	-99	-99	-99	-99	-99	-99
350	2	1	2	3	Quito	2	-99	-99	-99	-99	-99	-99	-99	-99	-99	-99	-99	-99	-99	-99	-99	-99	-99	-99	-99	-99	-99	-99	-99	-99	-99	-99	-99	-99	-99	-99	-99	-99	-99	-99	-99	-99	-99	-99	-99	-99	-99	-99	-99
576	3	3	1	2	España	3	-99	-99	-99	-99	-99	-99	-99	-99	-99	-99	-99	-99	-99	-99	-99	-99	-99	-99	-99	-99	-99	-99	-99	-99	-99	-99	-99	-99	-99	-99	-99	-99	-99	-99	-99	-99	-99	-99	-99	-99	-99	-99	-99
405	1	3	2	1	Quito	2	216.129	216.129	216.585	1	3	1	2	1	1	1	1	1	1	1	1	1	2	1	1	1	1	1	1	7	7	1	7	1	1	1	5	5	5	1	0	0	267.778	0	1	1	1	1	1
63	2	2	3	1	España	3	-99	-99	-99	-99	-99	-99	-99	-99	-99	-99	-99	-99	-99	-99	-99	-99	-99	-99	-99	-99	-99	-99	-99	-99	-99	-99	-99	-99	-99	-99	-99	-99	-99	-99	-99	-99	-99	-99	-99	-99	-99	-99	-99
167	1	2	1	3	Quito	2	0	0	176.216	0	3	1	2	2	3	2	3	3	6	4	2	3	1	7	5	4	2	1	2	4	4	7	7	6	5	7	3	5	5	4	0	0	254.277	0	5	1	3	3	3
369	3	2	1	3	Quito	2	-99	-99	-99	-99	-99	-99	-99	-99	-99	-99	-99	-99	-99	-99	-99	-99	-99	-99	-99	-99	-99	-99	-99	-99	-99	-99	-99	-99	-99	-99	-99	-99	-99	-99	-99	-99	-99	-99	-99	-99	-99	-99	-99
297	3	1	2	3	Quito	2	-99	-99	-99	-99	-99	-99	-99	-99	-99	-99	-99	-99	-99	-99	-99	-99	-99	-99	-99	-99	-99	-99	-99	-99	-99	-99	-99	-99	-99	-99	-99	-99	-99	-99	-99	-99	-99	-99	-99	-99	-99	-99	-99
523	1	2	1	3	España	3	0	0	272.149	0	2	1	1	1	1	1	1	1	2	1	1	1	1	1	1	1	1	1	1	2	3	3	3	4	2	4	1	5	5	5	0	0	287.82	0	8	1	2	5	1
357	2	3	1	2	Quito	2	-99	-99	-99	-99	-99	-99	-99	-99	-99	-99	-99	-99	-99	-99	-99	-99	-99	-99	-99	-99	-99	-99	-99	-99	-99	-99	-99	-99	-99	-99	-99	-99	-99	-99	-99	-99	-99	-99	-99	-99	-99	-99	-99
374	1	1	3	2	Quito	2	52.528	52.528	224.099	1	6	5	7	7	5	7	7	7	7	7	5	7	5	5	7	7	6	6	7	7	7	7	7	7	7	7	4	5	5	5	270.7	270.7	272.066	1	7	6	7	7	7
351	3	1	2	3	Quito	2	-99	-99	-99	-99	-99	-99	-99	-99	-99	-99	-99	-99	-99	-99	-99	-99	-99	-99	-99	-99	-99	-99	-99	-99	-99	-99	-99	-99	-99	-99	-99	-99	-99	-99	-99	-99	-99	-99	-99	-99	-99	-99	-99
321	1	1	2	3	España	3	0	0	224.052	0	5	2	5	5	4	6	5	4	6	5	2	2	2	2	7	6	5	1	6	6	7	7	7	7	7	7	2	2	2	2	0	0	275.172	0	8	1	5	4	2
82	2	1	3	2	España	3	-99	-99	-99	-99	-99	-99	-99	-99	-99	-99	-99	-99	-99	-99	-99	-99	-99	-99	-99	-99	-99	-99	-99	-99	-99	-99	-99	-99	-99	-99	-99	-99	-99	-99	-99	-99	-99	-99	-99	-99	-99	-99	-99
141	1	1	2	3	Quito	2	0	0	235.286	0	7	3	4	4	3	5	5	6	5	4	3	3	3	6	7	7	1	1	1	4	4	5	6	7	6	6	4	4	4	4	0	0	290.313	0	4	1	3	5	2
398	2	3	1	2	Quito	2	-99	-99	-99	-99	-99	-99	-99	-99	-99	-99	-99	-99	-99	-99	-99	-99	-99	-99	-99	-99	-99	-99	-99	-99	-99	-99	-99	-99	-99	-99	-99	-99	-99	-99	-99	-99	-99	-99	-99	-99	-99	-99	-99
115	2	3	2	1	Gasteiz	1	-99	-99	-99	-99	-99	-99	-99	-99	-99	-99	-99	-99	-99	-99	-99	-99	-99	-99	-99	-99	-99	-99	-99	-99	-99	-99	-99	-99	-99	-99	-99	-99	-99	-99	-99	-99	-99	-99	-99	-99	-99	-99	-99
378	3	2	1	3	Quito	2	-99	-99	-99	-99	-99	-99	-99	-99	-99	-99	-99	-99	-99	-99	-99	-99	-99	-99	-99	-99	-99	-99	-99	-99	-99	-99	-99	-99	-99	-99	-99	-99	-99	-99	-99	-99	-99	-99	-99	-99	-99	-99	-99
501	1	1	3	2	España	3	92.494	222.908	226.032	3	4	4	3	3	3	3	3	3	3	4	3	3	4	7	5	4	3	4	2	5	6	3	5	5	6	4	3	3	3	3	0	0	276.289	0	8	8	6	8	8
398	2	2	3	1	España	3	-99	-99	-99	-99	-99	-99	-99	-99	-99	-99	-99	-99	-99	-99	-99	-99	-99	-99	-99	-99	-99	-99	-99	-99	-99	-99	-99	-99	-99	-99	-99	-99	-99	-99	-99	-99	-99	-99	-99	-99	-99	-99	-99
618	1	3	2	1	España	3	0	0	221.589	0	4	2	4	4	3	4	4	4	4	5	4	4	3	3	5	5	5	3	5	5	5	5	5	3	3	4	2	3	2	2	0	0	281.612	0	5	4	4	4	3
383	2	3	2	1	España	3	-99	-99	-99	-99	-99	-99	-99	-99	-99	-99	-99	-99	-99	-99	-99	-99	-99	-99	-99	-99	-99	-99	-99	-99	-99	-99	-99	-99	-99	-99	-99	-99	-99	-99	-99	-99	-99	-99	-99	-99	-99	-99	-99
296	1	2	1	3	Quito	2	0	0	4.524	0	4	4	4	4	4	4	4	4	4	4	4	4	4	4	4	4	4	4	4	4	4	4	4	4	4	4	4	4	4	4	0	0	283.852	0	5	2	4	4	2
219	3	2	1	3	Quito	2	-99	-99	-99	-99	-99	-99	-99	-99	-99	-99	-99	-99	-99	-99	-99	-99	-99	-99	-99	-99	-99	-99	-99	-99	-99	-99	-99	-99	-99	-99	-99	-99	-99	-99	-99	-99	-99	-99	-99	-99	-99	-99	-99
246	1	1	3	2	España	3	51.432	124.275	220.366	4	6	1	4	4	4	5	5	6	3	5	2	2	4	4	3	4	5	5	5	5	4	6	6	6	6	6	3	3	4	3	0	0	125.554	0	6	3	5	4	2
26	3	3	2	1	España	3	-99	-99	-99	-99	-99	-99	-99	-99	-99	-99	-99	-99	-99	-99	-99	-99	-99	-99	-99	-99	-99	-99	-99	-99	-99	-99	-99	-99	-99	-99	-99	-99	-99	-99	-99	-99	-99	-99	-99	-99	-99	-99	-99
212	2	3	2	1	España	3	-99	-99	-99	-99	-99	-99	-99	-99	-99	-99	-99	-99	-99	-99	-99	-99	-99	-99	-99	-99	-99	-99	-99	-99	-99	-99	-99	-99	-99	-99	-99	-99	-99	-99	-99	-99	-99	-99	-99	-99	-99	-99	-99
387	1	1	2	3	España	3	0	0	229.263	0	4	4	2	2	1	1	1	1	1	1	1	1	1	1	1	1	1	1	1	1	1	3	5	5	2	3	4	5	1	4	0	0	332.762	0	5	3	5	5	5
668	2	2	3	1	España	3	-99	-99	-99	-99	-99	-99	-99	-99	-99	-99	-99	-99	-99	-99	-99	-99	-99	-99	-99	-99	-99	-99	-99	-99	-99	-99	-99	-99	-99	-99	-99	-99	-99	-99	-99	-99	-99	-99	-99	-99	-99	-99	-99
306	1	2	1	3	Quito	2	0	0	221.312	0	7	3	7	7	1	7	7	7	6	2	1	1	1	1	3	4	4	4	5	6	6	7	7	1	1	3	4	2	5	5	0	0	314.549	0	5	2	6	6	1
316	3	2	3	1	Quito	2	-99	-99	-99	-99	-99	-99	-99	-99	-99	-99	-99	-99	-99	-99	-99	-99	-99	-99	-99	-99	-99	-99	-99	-99	-99	-99	-99	-99	-99	-99	-99	-99	-99	-99	-99	-99	-99	-99	-99	-99	-99	-99	-99
288	3	3	2	1	Quito	2	-99	-99	-99	-99	-99	-99	-99	-99	-99	-99	-99	-99	-99	-99	-99	-99	-99	-99	-99	-99	-99	-99	-99	-99	-99	-99	-99	-99	-99	-99	-99	-99	-99	-99	-99	-99	-99	-99	-99	-99	-99	-99	-99
236	2	2	3	1	España	3	-99	-99	-99	-99	-99	-99	-99	-99	-99	-99	-99	-99	-99	-99	-99	-99	-99	-99	-99	-99	-99	-99	-99	-99	-99	-99	-99	-99	-99	-99	-99	-99	-99	-99	-99	-99	-99	-99	-99	-99	-99	-99	-99
186	3	2	1	3	Quito	2	-99	-99	-99	-99	-99	-99	-99	-99	-99	-99	-99	-99	-99	-99	-99	-99	-99	-99	-99	-99	-99	-99	-99	-99	-99	-99	-99	-99	-99	-99	-99	-99	-99	-99	-99	-99	-99	-99	-99	-99	-99	-99	-99
260	3	1	2	3	Quito	2	-99	-99	-99	-99	-99	-99	-99	-99	-99	-99	-99	-99	-99	-99	-99	-99	-99	-99	-99	-99	-99	-99	-99	-99	-99	-99	-99	-99	-99	-99	-99	-99	-99	-99	-99	-99	-99	-99	-99	-99	-99	-99	-99
309	1	1	3	2	Quito	2	116.071	116.071	447.29	1	7	2	6	4	1	6	6	4	3	7	4	2	1	4	7	6	1	4	3	4	7	7	7	6	5	7	4	2	3	5	0	0	271.691	0	7	2	7	6	4
362	2	2	3	1	Quito	2	-99	-99	-99	-99	-99	-99	-99	-99	-99	-99	-99	-99	-99	-99	-99	-99	-99	-99	-99	-99	-99	-99	-99	-99	-99	-99	-99	-99	-99	-99	-99	-99	-99	-99	-99	-99	-99	-99	-99	-99	-99	-99	-99
198	1	1	3	2	España	3	0	0	41.255	0	7	4	4	5	7	7	7	7	7	4	4	4	6	6	6	6	4	4	4	4	4	7	7	5	5	5	4	4	4	4	0	0	18.854	0	5	5	5	5	8
156	3	1	2	3	España	3	-99	-99	-99	-99	-99	-99	-99	-99	-99	-99	-99	-99	-99	-99	-99	-99	-99	-99	-99	-99	-99	-99	-99	-99	-99	-99	-99	-99	-99	-99	-99	-99	-99	-99	-99	-99	-99	-99	-99	-99	-99	-99	-99
363	3	3	1	2	España	3	-99	-99	-99	-99	-99	-99	-99	-99	-99	-99	-99	-99	-99	-99	-99	-99	-99	-99	-99	-99	-99	-99	-99	-99	-99	-99	-99	-99	-99	-99	-99	-99	-99	-99	-99	-99	-99	-99	-99	-99	-99	-99	-99
371	3	3	2	1	Quito	2	-99	-99	-99	-99	-99	-99	-99	-99	-99	-99	-99	-99	-99	-99	-99	-99	-99	-99	-99	-99	-99	-99	-99	-99	-99	-99	-99	-99	-99	-99	-99	-99	-99	-99	-99	-99	-99	-99	-99	-99	-99	-99	-99
91	3	1	3	2	España	3	-99	-99	-99	-99	-99	-99	-99	-99	-99	-99	-99	-99	-99	-99	-99	-99	-99	-99	-99	-99	-99	-99	-99	-99	-99	-99	-99	-99	-99	-99	-99	-99	-99	-99	-99	-99	-99	-99	-99	-99	-99	-99	-99
292	2	1	2	3	Quito	2	-99	-99	-99	-99	-99	-99	-99	-99	-99	-99	-99	-99	-99	-99	-99	-99	-99	-99	-99	-99	-99	-99	-99	-99	-99	-99	-99	-99	-99	-99	-99	-99	-99	-99	-99	-99	-99	-99	-99	-99	-99	-99	-99
3	3	3	2	1	España	3	-99	-99	-99	-99	-99	-99	-99	-99	-99	-99	-99	-99	-99	-99	-99	-99	-99	-99	-99	-99	-99	-99	-99	-99	-99	-99	-99	-99	-99	-99	-99	-99	-99	-99	-99	-99	-99	-99	-99	-99	-99	-99	-99
367	2	3	2	1	Quito	2	-99	-99	-99	-99	-99	-99	-99	-99	-99	-99	-99	-99	-99	-99	-99	-99	-99	-99	-99	-99	-99	-99	-99	-99	-99	-99	-99	-99	-99	-99	-99	-99	-99	-99	-99	-99	-99	-99	-99	-99	-99	-99	-99
318	3	3	2	1	España	3	-99	-99	-99	-99	-99	-99	-99	-99	-99	-99	-99	-99	-99	-99	-99	-99	-99	-99	-99	-99	-99	-99	-99	-99	-99	-99	-99	-99	-99	-99	-99	-99	-99	-99	-99	-99	-99	-99	-99	-99	-99	-99	-99
281	2	1	2	3	España	3	-99	-99	-99	-99	-99	-99	-99	-99	-99	-99	-99	-99	-99	-99	-99	-99	-99	-99	-99	-99	-99	-99	-99	-99	-99	-99	-99	-99	-99	-99	-99	-99	-99	-99	-99	-99	-99	-99	-99	-99	-99	-99	-99
661	2	2	1	3	España	3	-99	-99	-99	-99	-99	-99	-99	-99	-99	-99	-99	-99	-99	-99	-99	-99	-99	-99	-99	-99	-99	-99	-99	-99	-99	-99	-99	-99	-99	-99	-99	-99	-99	-99	-99	-99	-99	-99	-99	-99	-99	-99	-99
365	1	3	1	2	Quito	2	0	0	219.963	0	6	5	6	5	4	7	6	6	6	6	1	6	4	4	6	7	6	5	6	6	6	5	6	7	5	6	3	3	4	4	0	0	307.294	0	5	5	5	5	5
665	2	2	1	3	España	3	-99	-99	-99	-99	-99	-99	-99	-99	-99	-99	-99	-99	-99	-99	-99	-99	-99	-99	-99	-99	-99	-99	-99	-99	-99	-99	-99	-99	-99	-99	-99	-99	-99	-99	-99	-99	-99	-99	-99	-99	-99	-99	-99
632	3	3	1	2	España	3	-99	-99	-99	-99	-99	-99	-99	-99	-99	-99	-99	-99	-99	-99	-99	-99	-99	-99	-99	-99	-99	-99	-99	-99	-99	-99	-99	-99	-99	-99	-99	-99	-99	-99	-99	-99	-99	-99	-99	-99	-99	-99	-99
217	2	1	3	2	España	3	-99	-99	-99	-99	-99	-99	-99	-99	-99	-99	-99	-99	-99	-99	-99	-99	-99	-99	-99	-99	-99	-99	-99	-99	-99	-99	-99	-99	-99	-99	-99	-99	-99	-99	-99	-99	-99	-99	-99	-99	-99	-99	-99
1	1	3	1	2	Gasteiz	1	0	0	218.596	0	7	2	6	6	5	6	6	5	7	7	4	6	4	6	6	6	6	5	7	6	7	7	7	6	7	7	5	5	5	4	0	0	289.633	0	6	2	5	5	2
150	3	1	3	2	España	3	-99	-99	-99	-99	-99	-99	-99	-99	-99	-99	-99	-99	-99	-99	-99	-99	-99	-99	-99	-99	-99	-99	-99	-99	-99	-99	-99	-99	-99	-99	-99	-99	-99	-99	-99	-99	-99	-99	-99	-99	-99	-99	-99
68	1	1	2	3	España	3	0	0	233.142	0	6	3	6	6	3	6	6	6	6	6	3	3	3	3	6	6	6	3	6	6	6	6	6	6	6	6	4	4	3	4	330.137	330.137	372.604	1	6	6	6	6	6
63	2	3	1	2	Gasteiz	1	-99	-99	-99	-99	-99	-99	-99	-99	-99	-99	-99	-99	-99	-99	-99	-99	-99	-99	-99	-99	-99	-99	-99	-99	-99	-99	-99	-99	-99	-99	-99	-99	-99	-99	-99	-99	-99	-99	-99	-99	-99	-99	-99
87	2	3	2	1	España	3	-99	-99	-99	-99	-99	-99	-99	-99	-99	-99	-99	-99	-99	-99	-99	-99	-99	-99	-99	-99	-99	-99	-99	-99	-99	-99	-99	-99	-99	-99	-99	-99	-99	-99	-99	-99	-99	-99	-99	-99	-99	-99	-99
11	2	2	3	1	España	3	-99	-99	-99	-99	-99	-99	-99	-99	-99	-99	-99	-99	-99	-99	-99	-99	-99	-99	-99	-99	-99	-99	-99	-99	-99	-99	-99	-99	-99	-99	-99	-99	-99	-99	-99	-99	-99	-99	-99	-99	-99	-99	-99
470	1	3	1	2	España	3	0	0	123.928	0	7	7	3	3	2	5	7	3	3	3	3	3	3	7	3	3	3	4	1	3	6	6	6	6	6	6	1	1	1	1	0	0	276.935	0	8	6	8	8	1
567	2	1	3	2	España	3	-99	-99	-99	-99	-99	-99	-99	-99	-99	-99	-99	-99	-99	-99	-99	-99	-99	-99	-99	-99	-99	-99	-99	-99	-99	-99	-99	-99	-99	-99	-99	-99	-99	-99	-99	-99	-99	-99	-99	-99	-99	-99	-99
410	3	2	3	1	Quito	2	-99	-99	-99	-99	-99	-99	-99	-99	-99	-99	-99	-99	-99	-99	-99	-99	-99	-99	-99	-99	-99	-99	-99	-99	-99	-99	-99	-99	-99	-99	-99	-99	-99	-99	-99	-99	-99	-99	-99	-99	-99	-99	-99
354	1	2	1	3	Quito	2	165.304	165.304	168.364	1	6	3	5	5	6	6	6	6	6	4	3	4	4	5	6	5	4	1	3	5	5	6	6	5	3	4	2	2	4	4	0	0	304.044	0	6	4	5	5	5
394	2	3	2	1	Quito	2	-99	-99	-99	-99	-99	-99	-99	-99	-99	-99	-99	-99	-99	-99	-99	-99	-99	-99	-99	-99	-99	-99	-99	-99	-99	-99	-99	-99	-99	-99	-99	-99	-99	-99	-99	-99	-99	-99	-99	-99	-99	-99	-99
4	2	2	1	3	Gasteiz	1	-99	-99	-99	-99	-99	-99	-99	-99	-99	-99	-99	-99	-99	-99	-99	-99	-99	-99	-99	-99	-99	-99	-99	-99	-99	-99	-99	-99	-99	-99	-99	-99	-99	-99	-99	-99	-99	-99	-99	-99	-99	-99	-99
178	1	2	1	3	Quito	2	0	0	234.025	0	7	2	3	6	4	4	7	4	5	6	6	4	5	5	6	5	3	3	5	4	5	6	7	7	7	7	4	4	4	5	0	0	287.716	0	7	1	7	5	7
582	2	1	2	3	España	3	-99	-99	-99	-99	-99	-99	-99	-99	-99	-99	-99	-99	-99	-99	-99	-99	-99	-99	-99	-99	-99	-99	-99	-99	-99	-99	-99	-99	-99	-99	-99	-99	-99	-99	-99	-99	-99	-99	-99	-99	-99	-99	-99
306	3	3	2	1	España	3	-99	-99	-99	-99	-99	-99	-99	-99	-99	-99	-99	-99	-99	-99	-99	-99	-99	-99	-99	-99	-99	-99	-99	-99	-99	-99	-99	-99	-99	-99	-99	-99	-99	-99	-99	-99	-99	-99	-99	-99	-99	-99	-99
350	3	3	2	1	España	3	-99	-99	-99	-99	-99	-99	-99	-99	-99	-99	-99	-99	-99	-99	-99	-99	-99	-99	-99	-99	-99	-99	-99	-99	-99	-99	-99	-99	-99	-99	-99	-99	-99	-99	-99	-99	-99	-99	-99	-99	-99	-99	-99
232	1	2	3	1	Quito	2	0	0	222.543	0	7	1	7	7	1	7	7	7	7	7	1	1	1	7	7	7	7	1	7	7	7	7	7	6	7	7	4	5	5	5	0	0	269.684	0	7	1	7	7	1
403	3	2	3	1	Quito	2	-99	-99	-99	-99	-99	-99	-99	-99	-99	-99	-99	-99	-99	-99	-99	-99	-99	-99	-99	-99	-99	-99	-99	-99	-99	-99	-99	-99	-99	-99	-99	-99	-99	-99	-99	-99	-99	-99	-99	-99	-99	-99	-99
253	3	2	1	3	Quito	2	-99	-99	-99	-99	-99	-99	-99	-99	-99	-99	-99	-99	-99	-99	-99	-99	-99	-99	-99	-99	-99	-99	-99	-99	-99	-99	-99	-99	-99	-99	-99	-99	-99	-99	-99	-99	-99	-99	-99	-99	-99	-99	-99
369	3	2	1	3	España	3	-99	-99	-99	-99	-99	-99	-99	-99	-99	-99	-99	-99	-99	-99	-99	-99	-99	-99	-99	-99	-99	-99	-99	-99	-99	-99	-99	-99	-99	-99	-99	-99	-99	-99	-99	-99	-99	-99	-99	-99	-99	-99	-99
259	1	2	1	3	Quito	2	0	0	217.162	0	6	4	5	4	2	6	5	5	6	6	3	4	3	2	6	5	6	2	3	6	6	7	7	6	6	6	3	5	4	5	0	0	267.604	0	2	2	5	6	2
169	2	1	3	2	Quito	2	-99	-99	-99	-99	-99	-99	-99	-99	-99	-99	-99	-99	-99	-99	-99	-99	-99	-99	-99	-99	-99	-99	-99	-99	-99	-99	-99	-99	-99	-99	-99	-99	-99	-99	-99	-99	-99	-99	-99	-99	-99	-99	-99
166	3	2	1	3	Quito	2	-99	-99	-99	-99	-99	-99	-99	-99	-99	-99	-99	-99	-99	-99	-99	-99	-99	-99	-99	-99	-99	-99	-99	-99	-99	-99	-99	-99	-99	-99	-99	-99	-99	-99	-99	-99	-99	-99	-99	-99	-99	-99	-99
657	3	3	1	2	España	3	-99	-99	-99	-99	-99	-99	-99	-99	-99	-99	-99	-99	-99	-99	-99	-99	-99	-99	-99	-99	-99	-99	-99	-99	-99	-99	-99	-99	-99	-99	-99	-99	-99	-99	-99	-99	-99	-99	-99	-99	-99	-99	-99
258	3	1	2	3	Quito	2	-99	-99	-99	-99	-99	-99	-99	-99	-99	-99	-99	-99	-99	-99	-99	-99	-99	-99	-99	-99	-99	-99	-99	-99	-99	-99	-99	-99	-99	-99	-99	-99	-99	-99	-99	-99	-99	-99	-99	-99	-99	-99	-99
352	3	3	1	2	Quito	2	-99	-99	-99	-99	-99	-99	-99	-99	-99	-99	-99	-99	-99	-99	-99	-99	-99	-99	-99	-99	-99	-99	-99	-99	-99	-99	-99	-99	-99	-99	-99	-99	-99	-99	-99	-99	-99	-99	-99	-99	-99	-99	-99
346	2	2	3	1	Quito	2	-99	-99	-99	-99	-99	-99	-99	-99	-99	-99	-99	-99	-99	-99	-99	-99	-99	-99	-99	-99	-99	-99	-99	-99	-99	-99	-99	-99	-99	-99	-99	-99	-99	-99	-99	-99	-99	-99	-99	-99	-99	-99	-99
383	1	2	3	1	Quito	2	0	0	217.624	0	7	1	5	6	4	6	7	7	6	3	4	3	4	7	4	5	2	2	3	6	5	5	5	7	7	7	4	4	5	5	0	0	266.828	0	5	2	3	4	2
206	2	1	2	3	España	3	-99	-99	-99	-99	-99	-99	-99	-99	-99	-99	-99	-99	-99	-99	-99	-99	-99	-99	-99	-99	-99	-99	-99	-99	-99	-99	-99	-99	-99	-99	-99	-99	-99	-99	-99	-99	-99	-99	-99	-99	-99	-99	-99
205	3	3	1	2	Quito	2	-99	-99	-99	-99	-99	-99	-99	-99	-99	-99	-99	-99	-99	-99	-99	-99	-99	-99	-99	-99	-99	-99	-99	-99	-99	-99	-99	-99	-99	-99	-99	-99	-99	-99	-99	-99	-99	-99	-99	-99	-99	-99	-99
172	1	3	1	2	Quito	2	0	0	154.156	0	6	1	3	3	3	4	2	3	3	4	1	1	1	4	5	4	2	1	1	4	4	4	5	6	7	7	3	3	4	4	47.24	47.24	267.678	1	5	2	5	6	3
222	1	1	3	2	Quito	2	0	0	212.926	0	1	2	2	2	3	2	2	2	2	2	2	2	3	2	3	2	2	3	3	3	2	3	2	4	4	5	3	4	4	3	0	0	145.864	0	4	4	3	3	3
347	1	2	3	1	Quito	2	15.183	117.974	124.643	3	6	1	5	5	1	6	6	6	5	6	1	6	5	6	7	7	6	5	5	6	7	7	7	7	7	7	4	5	4	5	7.886	134.71	140.944	2	7	1	7	7	1
455	1	2	3	1	España	3	219.66	219.66	220.96	1	7	4	5	5	5	5	5	5	5	4	2	2	1	1	3	3	2	1	1	2	3	3	7	5	6	6	1	5	5	5	56.094	56.094	271.069	1	5	1	2	5	4
321	1	3	1	2	Quito	2	0	0	214.078	0	6	6	6	6	6	6	6	6	7	7	6	7	6	7	7	7	7	7	7	7	7	7	7	7	7	7	4	4	5	5	0	0	271.155	0	6	6	6	7	6
73	1	1	3	2	España	3	20.8	222.155	224.421	2	6	7	5	5	6	6	6	6	6	4	4	4	4	6	6	6	6	4	5	6	6	6	6	7	6	7	5	4	4	3	0	0	344.162	0	8	2	6	6	5
345	2	3	2	1	Quito	2	-99	-99	-99	-99	-99	-99	-99	-99	-99	-99	-99	-99	-99	-99	-99	-99	-99	-99	-99	-99	-99	-99	-99	-99	-99	-99	-99	-99	-99	-99	-99	-99	-99	-99	-99	-99	-99	-99	-99	-99	-99	-99	-99
401	1	3	2	1	España	3	5.262	41.899	219.248	3	4	4	3	3	2	4	3	3	3	3	1	2	1	4	4	4	3	2	3	3	3	3	3	3	2	3	4	4	4	4	0	0	272.743	0	4	4	3	2	2
324	3	2	3	1	España	3	-99	-99	-99	-99	-99	-99	-99	-99	-99	-99	-99	-99	-99	-99	-99	-99	-99	-99	-99	-99	-99	-99	-99	-99	-99	-99	-99	-99	-99	-99	-99	-99	-99	-99	-99	-99	-99	-99	-99	-99	-99	-99	-99
252	2	2	1	3	España	3	-99	-99	-99	-99	-99	-99	-99	-99	-99	-99	-99	-99	-99	-99	-99	-99	-99	-99	-99	-99	-99	-99	-99	-99	-99	-99	-99	-99	-99	-99	-99	-99	-99	-99	-99	-99	-99	-99	-99	-99	-99	-99	-99
486	3	3	1	2	España	3	-99	-99	-99	-99	-99	-99	-99	-99	-99	-99	-99	-99	-99	-99	-99	-99	-99	-99	-99	-99	-99	-99	-99	-99	-99	-99	-99	-99	-99	-99	-99	-99	-99	-99	-99	-99	-99	-99	-99	-99	-99	-99	-99
165	2	2	3	1	España	3	-99	-99	-99	-99	-99	-99	-99	-99	-99	-99	-99	-99	-99	-99	-99	-99	-99	-99	-99	-99	-99	-99	-99	-99	-99	-99	-99	-99	-99	-99	-99	-99	-99	-99	-99	-99	-99	-99	-99	-99	-99	-99	-99
170	2	1	3	2	Quito	2	-99	-99	-99	-99	-99	-99	-99	-99	-99	-99	-99	-99	-99	-99	-99	-99	-99	-99	-99	-99	-99	-99	-99	-99	-99	-99	-99	-99	-99	-99	-99	-99	-99	-99	-99	-99	-99	-99	-99	-99	-99	-99	-99
302	2	2	3	1	Quito	2	-99	-99	-99	-99	-99	-99	-99	-99	-99	-99	-99	-99	-99	-99	-99	-99	-99	-99	-99	-99	-99	-99	-99	-99	-99	-99	-99	-99	-99	-99	-99	-99	-99	-99	-99	-99	-99	-99	-99	-99	-99	-99	-99
259	3	3	1	2	España	3	-99	-99	-99	-99	-99	-99	-99	-99	-99	-99	-99	-99	-99	-99	-99	-99	-99	-99	-99	-99	-99	-99	-99	-99	-99	-99	-99	-99	-99	-99	-99	-99	-99	-99	-99	-99	-99	-99	-99	-99	-99	-99	-99
256	3	3	2	1	Quito	2	-99	-99	-99	-99	-99	-99	-99	-99	-99	-99	-99	-99	-99	-99	-99	-99	-99	-99	-99	-99	-99	-99	-99	-99	-99	-99	-99	-99	-99	-99	-99	-99	-99	-99	-99	-99	-99	-99	-99	-99	-99	-99	-99
208	2	1	2	3	Quito	2	-99	-99	-99	-99	-99	-99	-99	-99	-99	-99	-99	-99	-99	-99	-99	-99	-99	-99	-99	-99	-99	-99	-99	-99	-99	-99	-99	-99	-99	-99	-99	-99	-99	-99	-99	-99	-99	-99	-99	-99	-99	-99	-99
214	3	1	3	2	Quito	2	-99	-99	-99	-99	-99	-99	-99	-99	-99	-99	-99	-99	-99	-99	-99	-99	-99	-99	-99	-99	-99	-99	-99	-99	-99	-99	-99	-99	-99	-99	-99	-99	-99	-99	-99	-99	-99	-99	-99	-99	-99	-99	-99
189	3	1	2	3	España	3	-99	-99	-99	-99	-99	-99	-99	-99	-99	-99	-99	-99	-99	-99	-99	-99	-99	-99	-99	-99	-99	-99	-99	-99	-99	-99	-99	-99	-99	-99	-99	-99	-99	-99	-99	-99	-99	-99	-99	-99	-99	-99	-99
323	2	2	1	3	España	3	-99	-99	-99	-99	-99	-99	-99	-99	-99	-99	-99	-99	-99	-99	-99	-99	-99	-99	-99	-99	-99	-99	-99	-99	-99	-99	-99	-99	-99	-99	-99	-99	-99	-99	-99	-99	-99	-99	-99	-99	-99	-99	-99
13	2	3	2	1	España	3	-99	-99	-99	-99	-99	-99	-99	-99	-99	-99	-99	-99	-99	-99	-99	-99	-99	-99	-99	-99	-99	-99	-99	-99	-99	-99	-99	-99	-99	-99	-99	-99	-99	-99	-99	-99	-99	-99	-99	-99	-99	-99	-99
49	3	1	2	3	España	3	-99	-99	-99	-99	-99	-99	-99	-99	-99	-99	-99	-99	-99	-99	-99	-99	-99	-99	-99	-99	-99	-99	-99	-99	-99	-99	-99	-99	-99	-99	-99	-99	-99	-99	-99	-99	-99	-99	-99	-99	-99	-99	-99
157	2	2	3	1	España	3	-99	-99	-99	-99	-99	-99	-99	-99	-99	-99	-99	-99	-99	-99	-99	-99	-99	-99	-99	-99	-99	-99	-99	-99	-99	-99	-99	-99	-99	-99	-99	-99	-99	-99	-99	-99	-99	-99	-99	-99	-99	-99	-99
402	1	2	3	1	España	3	0	0	221.878	0	6	6	7	7	6	7	7	7	6	7	7	6	6	7	7	6	6	6	6	6	6	7	7	6	6	6	4	4	3	3	0	0	267.609	0	6	6	8	8	6
563	2	2	3	1	España	3	-99	-99	-99	-99	-99	-99	-99	-99	-99	-99	-99	-99	-99	-99	-99	-99	-99	-99	-99	-99	-99	-99	-99	-99	-99	-99	-99	-99	-99	-99	-99	-99	-99	-99	-99	-99	-99	-99	-99	-99	-99	-99	-99
65	1	3	2	1	Gasteiz	1	0	0	223.252	0	4	1	3	3	3	4	5	5	3	4	2	4	2	6	6	5	4	3	1	5	5	4	4	5	6	5	4	4	3	4	0	0	267.274	0	5	2	5	5	2
254	1	1	2	3	Quito	2	0	0	180.109	0	4	6	5	7	6	6	6	6	5	4	5	5	1	5	5	5	5	2	5	4	6	3	6	5	6	5	2	5	5	4	0	0	257.393	0	6	5	5	5	5
218	3	3	2	1	Quito	2	-99	-99	-99	-99	-99	-99	-99	-99	-99	-99	-99	-99	-99	-99	-99	-99	-99	-99	-99	-99	-99	-99	-99	-99	-99	-99	-99	-99	-99	-99	-99	-99	-99	-99	-99	-99	-99	-99	-99	-99	-99	-99	-99
203	2	2	1	3	Quito	2	-99	-99	-99	-99	-99	-99	-99	-99	-99	-99	-99	-99	-99	-99	-99	-99	-99	-99	-99	-99	-99	-99	-99	-99	-99	-99	-99	-99	-99	-99	-99	-99	-99	-99	-99	-99	-99	-99	-99	-99	-99	-99	-99
314	1	3	1	2	Quito	2	0	0	197.63	0	7	1	7	7	1	7	7	7	7	7	7	7	7	7	7	7	7	7	7	7	7	7	7	7	7	7	5	5	5	5	0	0	186.6	0	7	1	7	7	1
261	1	2	1	3	Quito	2	60.145	60.145	244.79	1	7	2	7	7	1	7	7	5	5	7	7	6	4	2	6	7	7	1	7	7	5	7	7	7	7	7	3	4	5	5	44.096	44.096	297.2	1	7	6	7	7	2
251	2	1	2	3	Quito	2	-99	-99	-99	-99	-99	-99	-99	-99	-99	-99	-99	-99	-99	-99	-99	-99	-99	-99	-99	-99	-99	-99	-99	-99	-99	-99	-99	-99	-99	-99	-99	-99	-99	-99	-99	-99	-99	-99	-99	-99	-99	-99	-99
601	1	1	2	3	España	3	34.098	34.098	184.431	1	7	4	5	4	6	7	7	7	7	7	6	6	5	7	7	6	5	3	5	6	7	7	7	7	7	7	4	5	5	3	20.371	20.371	268.936	1	8	1	8	8	6
312	1	2	3	1	Quito	2	0	0	220.336	0	7	3	7	7	1	7	7	7	7	5	2	1	2	7	7	7	6	1	7	7	5	6	7	7	6	7	1	5	5	5	0	0	97.701	0	7	5	7	7	1
656	3	2	1	3	España	3	-99	-99	-99	-99	-99	-99	-99	-99	-99	-99	-99	-99	-99	-99	-99	-99	-99	-99	-99	-99	-99	-99	-99	-99	-99	-99	-99	-99	-99	-99	-99	-99	-99	-99	-99	-99	-99	-99	-99	-99	-99	-99	-99
100	3	2	1	3	España	3	-99	-99	-99	-99	-99	-99	-99	-99	-99	-99	-99	-99	-99	-99	-99	-99	-99	-99	-99	-99	-99	-99	-99	-99	-99	-99	-99	-99	-99	-99	-99	-99	-99	-99	-99	-99	-99	-99	-99	-99	-99	-99	-99
285	3	2	3	1	Quito	2	-99	-99	-99	-99	-99	-99	-99	-99	-99	-99	-99	-99	-99	-99	-99	-99	-99	-99	-99	-99	-99	-99	-99	-99	-99	-99	-99	-99	-99	-99	-99	-99	-99	-99	-99	-99	-99	-99	-99	-99	-99	-99	-99
620	3	2	1	3	España	3	-99	-99	-99	-99	-99	-99	-99	-99	-99	-99	-99	-99	-99	-99	-99	-99	-99	-99	-99	-99	-99	-99	-99	-99	-99	-99	-99	-99	-99	-99	-99	-99	-99	-99	-99	-99	-99	-99	-99	-99	-99	-99	-99
38	1	1	2	3	España	3	218.944	221.493	222.468	3	7	1	6	5	6	7	7	7	7	6	3	6	5	7	4	4	3	4	6	2	4	6	6	7	7	7	3	5	3	3	0	0	271.02	0	8	1	8	8	6
262	3	2	3	1	Quito	2	-99	-99	-99	-99	-99	-99	-99	-99	-99	-99	-99	-99	-99	-99	-99	-99	-99	-99	-99	-99	-99	-99	-99	-99	-99	-99	-99	-99	-99	-99	-99	-99	-99	-99	-99	-99	-99	-99	-99	-99	-99	-99	-99
278	1	2	1	3	España	3	0	0	218.056	0	5	5	5	5	7	7	7	7	7	7	6	6	6	6	7	6	7	1	1	6	1	7	7	1	7	3	4	4	4	4	0	0	363.898	0	8	1	8	8	1
506	2	1	3	2	España	3	-99	-99	-99	-99	-99	-99	-99	-99	-99	-99	-99	-99	-99	-99	-99	-99	-99	-99	-99	-99	-99	-99	-99	-99	-99	-99	-99	-99	-99	-99	-99	-99	-99	-99	-99	-99	-99	-99	-99	-99	-99	-99	-99
42	2	1	3	2	España	3	-99	-99	-99	-99	-99	-99	-99	-99	-99	-99	-99	-99	-99	-99	-99	-99	-99	-99	-99	-99	-99	-99	-99	-99	-99	-99	-99	-99	-99	-99	-99	-99	-99	-99	-99	-99	-99	-99	-99	-99	-99	-99	-99
37	2	1	2	3	España	3	-99	-99	-99	-99	-99	-99	-99	-99	-99	-99	-99	-99	-99	-99	-99	-99	-99	-99	-99	-99	-99	-99	-99	-99	-99	-99	-99	-99	-99	-99	-99	-99	-99	-99	-99	-99	-99	-99	-99	-99	-99	-99	-99
254	2	2	1	3	España	3	-99	-99	-99	-99	-99	-99	-99	-99	-99	-99	-99	-99	-99	-99	-99	-99	-99	-99	-99	-99	-99	-99	-99	-99	-99	-99	-99	-99	-99	-99	-99	-99	-99	-99	-99	-99	-99	-99	-99	-99	-99	-99	-99
12	1	3	2	1	Gasteiz	1	0	0	221.093	0	2	6	2	2	1	1	3	1	3	2	1	3	1	3	2	2	3	2	1	1	1	3	2	4	5	4	4	5	4	5	0	0	267.816	0	6	2	5	5	3
16	3	3	1	2	Gasteiz	1	-99	-99	-99	-99	-99	-99	-99	-99	-99	-99	-99	-99	-99	-99	-99	-99	-99	-99	-99	-99	-99	-99	-99	-99	-99	-99	-99	-99	-99	-99	-99	-99	-99	-99	-99	-99	-99	-99	-99	-99	-99	-99	-99
181	3	2	1	3	Quito	2	-99	-99	-99	-99	-99	-99	-99	-99	-99	-99	-99	-99	-99	-99	-99	-99	-99	-99	-99	-99	-99	-99	-99	-99	-99	-99	-99	-99	-99	-99	-99	-99	-99	-99	-99	-99	-99	-99	-99	-99	-99	-99	-99
127	1	3	2	1	España	3	241.978	241.978	243.689	1	5	1	5	2	1	5	5	3	4	4	2	3	4	6	6	4	3	3	4	3	4	6	6	4	4	4	3	4	3	4	0	0	279.275	0	8	6	4	5	3
67	3	1	3	2	España	3	-99	-99	-99	-99	-99	-99	-99	-99	-99	-99	-99	-99	-99	-99	-99	-99	-99	-99	-99	-99	-99	-99	-99	-99	-99	-99	-99	-99	-99	-99	-99	-99	-99	-99	-99	-99	-99	-99	-99	-99	-99	-99	-99
14	3	2	3	1	España	3	-99	-99	-99	-99	-99	-99	-99	-99	-99	-99	-99	-99	-99	-99	-99	-99	-99	-99	-99	-99	-99	-99	-99	-99	-99	-99	-99	-99	-99	-99	-99	-99	-99	-99	-99	-99	-99	-99	-99	-99	-99	-99	-99
614	2	3	2	1	España	3	-99	-99	-99	-99	-99	-99	-99	-99	-99	-99	-99	-99	-99	-99	-99	-99	-99	-99	-99	-99	-99	-99	-99	-99	-99	-99	-99	-99	-99	-99	-99	-99	-99	-99	-99	-99	-99	-99	-99	-99	-99	-99	-99
125	3	2	1	3	Gasteiz	1	-99	-99	-99	-99	-99	-99	-99	-99	-99	-99	-99	-99	-99	-99	-99	-99	-99	-99	-99	-99	-99	-99	-99	-99	-99	-99	-99	-99	-99	-99	-99	-99	-99	-99	-99	-99	-99	-99	-99	-99	-99	-99	-99
401	3	2	1	3	Quito	2	-99	-99	-99	-99	-99	-99	-99	-99	-99	-99	-99	-99	-99	-99	-99	-99	-99	-99	-99	-99	-99	-99	-99	-99	-99	-99	-99	-99	-99	-99	-99	-99	-99	-99	-99	-99	-99	-99	-99	-99	-99	-99	-99
417	2	2	1	3	Quito	2	-99	-99	-99	-99	-99	-99	-99	-99	-99	-99	-99	-99	-99	-99	-99	-99	-99	-99	-99	-99	-99	-99	-99	-99	-99	-99	-99	-99	-99	-99	-99	-99	-99	-99	-99	-99	-99	-99	-99	-99	-99	-99	-99
505	3	1	3	2	España	3	-99	-99	-99	-99	-99	-99	-99	-99	-99	-99	-99	-99	-99	-99	-99	-99	-99	-99	-99	-99	-99	-99	-99	-99	-99	-99	-99	-99	-99	-99	-99	-99	-99	-99	-99	-99	-99	-99	-99	-99	-99	-99	-99
126	1	1	3	2	Gasteiz	1	0	0	224.991	0	6	1	3	3	4	5	4	4	2	6	1	6	2	6	6	6	4	3	5	5	6	7	6	5	6	6	5	4	4	5	0	0	270.858	0	7	1	6	5	5
99	2	1	3	2	España	3	-99	-99	-99	-99	-99	-99	-99	-99	-99	-99	-99	-99	-99	-99	-99	-99	-99	-99	-99	-99	-99	-99	-99	-99	-99	-99	-99	-99	-99	-99	-99	-99	-99	-99	-99	-99	-99	-99	-99	-99	-99	-99	-99
224	3	2	1	3	Quito	2	-99	-99	-99	-99	-99	-99	-99	-99	-99	-99	-99	-99	-99	-99	-99	-99	-99	-99	-99	-99	-99	-99	-99	-99	-99	-99	-99	-99	-99	-99	-99	-99	-99	-99	-99	-99	-99	-99	-99	-99	-99	-99	-99
123	3	3	2	1	Gasteiz	1	-99	-99	-99	-99	-99	-99	-99	-99	-99	-99	-99	-99	-99	-99	-99	-99	-99	-99	-99	-99	-99	-99	-99	-99	-99	-99	-99	-99	-99	-99	-99	-99	-99	-99	-99	-99	-99	-99	-99	-99	-99	-99	-99
333	3	2	1	3	España	3	-99	-99	-99	-99	-99	-99	-99	-99	-99	-99	-99	-99	-99	-99	-99	-99	-99	-99	-99	-99	-99	-99	-99	-99	-99	-99	-99	-99	-99	-99	-99	-99	-99	-99	-99	-99	-99	-99	-99	-99	-99	-99	-99
485	3	2	1	3	España	3	-99	-99	-99	-99	-99	-99	-99	-99	-99	-99	-99	-99	-99	-99	-99	-99	-99	-99	-99	-99	-99	-99	-99	-99	-99	-99	-99	-99	-99	-99	-99	-99	-99	-99	-99	-99	-99	-99	-99	-99	-99	-99	-99
28	1	3	2	1	Gasteiz	1	0	0	185.682	0	4	5	3	3	4	4	3	3	5	3	4	4	2	6	3	3	3	4	2	4	4	3	7	4	5	5	4	5	5	3	0	0	187.953	0	6	4	5	6	5
27	3	3	2	1	España	3	-99	-99	-99	-99	-99	-99	-99	-99	-99	-99	-99	-99	-99	-99	-99	-99	-99	-99	-99	-99	-99	-99	-99	-99	-99	-99	-99	-99	-99	-99	-99	-99	-99	-99	-99	-99	-99	-99	-99	-99	-99	-99	-99
124	3	3	2	1	Gasteiz	1	-99	-99	-99	-99	-99	-99	-99	-99	-99	-99	-99	-99	-99	-99	-99	-99	-99	-99	-99	-99	-99	-99	-99	-99	-99	-99	-99	-99	-99	-99	-99	-99	-99	-99	-99	-99	-99	-99	-99	-99	-99	-99	-99
311	1	2	3	1	Quito	2	0	0	220.658	0	7	1	7	7	3	7	7	6	7	7	6	7	6	7	7	7	7	1	1	7	7	7	7	5	7	7	3	1	2	3	0	0	266.198	0	7	5	5	4	4
218	1	3	2	1	España	3	0	0	218.525	0	6	2	4	4	4	6	6	6	6	6	5	6	5	7	7	6	6	5	7	7	7	6	7	7	6	7	2	5	5	5	0	0	334.997	0	8	1	8	8	5
160	3	2	3	1	Quito	2	-99	-99	-99	-99	-99	-99	-99	-99	-99	-99	-99	-99	-99	-99	-99	-99	-99	-99	-99	-99	-99	-99	-99	-99	-99	-99	-99	-99	-99	-99	-99	-99	-99	-99	-99	-99	-99	-99	-99	-99	-99	-99	-99
200	1	1	2	3	Quito	2	0	0	305.329	0	5	4	3	3	5	3	5	4	2	3	2	3	6	2	2	5	5	6	6	5	2	2	6	5	4	3	2	4	3	3	0	0	281.654	0	4	2	4	6	2
298	1	3	1	2	Quito	2	0	0	114.473	0	6	5	5	6	6	6	5	5	5	6	5	5	5	6	6	6	5	5	5	5	5	5	7	5	5	5	3	4	5	4	0	0	268.837	0	4	4	3	3	3
235	1	3	2	1	Quito	2	0	0	206.896	0	7	1	7	7	1	7	7	7	7	2	7	7	7	7	7	6	6	1	5	6	6	6	6	4	3	2	4	4	4	3	0	0	283.015	0	7	1	7	7	2
317	2	3	2	1	Quito	2	-99	-99	-99	-99	-99	-99	-99	-99	-99	-99	-99	-99	-99	-99	-99	-99	-99	-99	-99	-99	-99	-99	-99	-99	-99	-99	-99	-99	-99	-99	-99	-99	-99	-99	-99	-99	-99	-99	-99	-99	-99	-99	-99
246	1	2	3	1	Quito	2	0	0	253.712	0	4	4	4	3	3	4	4	4	4	4	2	3	3	3	3	4	3	2	2	3	3	5	5	3	3	7	4	4	4	4	0	0	286.338	0	6	1	6	6	4
318	2	1	3	2	Quito	2	-99	-99	-99	-99	-99	-99	-99	-99	-99	-99	-99	-99	-99	-99	-99	-99	-99	-99	-99	-99	-99	-99	-99	-99	-99	-99	-99	-99	-99	-99	-99	-99	-99	-99	-99	-99	-99	-99	-99	-99	-99	-99	-99
244	2	3	2	1	Quito	2	-99	-99	-99	-99	-99	-99	-99	-99	-99	-99	-99	-99	-99	-99	-99	-99	-99	-99	-99	-99	-99	-99	-99	-99	-99	-99	-99	-99	-99	-99	-99	-99	-99	-99	-99	-99	-99	-99	-99	-99	-99	-99	-99
107	1	2	1	3	Gasteiz	1	0	0	217.383	0	6	1	2	2	2	6	5	5	5	6	2	2	1	2	7	5	4	3	4	6	6	7	7	4	3	7	4	5	4	4	0	0	306.156	0	6	5	4	4	4
287	1	1	3	2	Quito	2	0	0	223.186	0	7	4	7	6	4	7	7	7	6	4	4	3	2	4	6	6	5	5	7	6	7	5	6	6	4	7	2	5	5	5	0	0	270.541	0	7	6	7	7	5
230	2	2	3	1	Quito	2	-99	-99	-99	-99	-99	-99	-99	-99	-99	-99	-99	-99	-99	-99	-99	-99	-99	-99	-99	-99	-99	-99	-99	-99	-99	-99	-99	-99	-99	-99	-99	-99	-99	-99	-99	-99	-99	-99	-99	-99	-99	-99	-99
243	2	2	1	3	Quito	2	-99	-99	-99	-99	-99	-99	-99	-99	-99	-99	-99	-99	-99	-99	-99	-99	-99	-99	-99	-99	-99	-99	-99	-99	-99	-99	-99	-99	-99	-99	-99	-99	-99	-99	-99	-99	-99	-99	-99	-99	-99	-99	-99
303	3	1	2	3	España	3	-99	-99	-99	-99	-99	-99	-99	-99	-99	-99	-99	-99	-99	-99	-99	-99	-99	-99	-99	-99	-99	-99	-99	-99	-99	-99	-99	-99	-99	-99	-99	-99	-99	-99	-99	-99	-99	-99	-99	-99	-99	-99	-99
630	3	3	1	2	España	3	-99	-99	-99	-99	-99	-99	-99	-99	-99	-99	-99	-99	-99	-99	-99	-99	-99	-99	-99	-99	-99	-99	-99	-99	-99	-99	-99	-99	-99	-99	-99	-99	-99	-99	-99	-99	-99	-99	-99	-99	-99	-99	-99
70	1	3	2	1	España	3	891.341	891.341	892.257	1	4	2	3	2	4	3	2	3	4	5	2	2	2	4	5	4	3	4	3	5	5	4	4	4	5	5	4	4	3	3	0	0	360.218	0	6	2	4	4	5
135	2	1	3	2	España	3	-99	-99	-99	-99	-99	-99	-99	-99	-99	-99	-99	-99	-99	-99	-99	-99	-99	-99	-99	-99	-99	-99	-99	-99	-99	-99	-99	-99	-99	-99	-99	-99	-99	-99	-99	-99	-99	-99	-99	-99	-99	-99	-99
533	2	1	2	3	España	3	-99	-99	-99	-99	-99	-99	-99	-99	-99	-99	-99	-99	-99	-99	-99	-99	-99	-99	-99	-99	-99	-99	-99	-99	-99	-99	-99	-99	-99	-99	-99	-99	-99	-99	-99	-99	-99	-99	-99	-99	-99	-99	-99
335	3	1	3	2	España	3	-99	-99	-99	-99	-99	-99	-99	-99	-99	-99	-99	-99	-99	-99	-99	-99	-99	-99	-99	-99	-99	-99	-99	-99	-99	-99	-99	-99	-99	-99	-99	-99	-99	-99	-99	-99	-99	-99	-99	-99	-99	-99	-99
592	1	2	1	3	España	3	0	0	280.144	0	3	3	3	3	3	4	4	4	4	4	3	3	5	3	4	4	5	5	5	5	5	5	7	7	7	7	3	5	5	3	0	0	309.734	0	8	8	5	5	6
291	3	3	1	2	Quito	2	-99	-99	-99	-99	-99	-99	-99	-99	-99	-99	-99	-99	-99	-99	-99	-99	-99	-99	-99	-99	-99	-99	-99	-99	-99	-99	-99	-99	-99	-99	-99	-99	-99	-99	-99	-99	-99	-99	-99	-99	-99	-99	-99
631	3	1	2	3	España	3	-99	-99	-99	-99	-99	-99	-99	-99	-99	-99	-99	-99	-99	-99	-99	-99	-99	-99	-99	-99	-99	-99	-99	-99	-99	-99	-99	-99	-99	-99	-99	-99	-99	-99	-99	-99	-99	-99	-99	-99	-99	-99	-99
695	1	1	3	2	España	3	0	0	5.59	0	7	2	7	6	4	7	6	6	6	7	4	5	3	6	5	6	6	7	7	7	4	7	7	7	7	7	3	3	5	5	0	0	1.719	0	8	2	5	8	3
12	2	2	3	1	España	3	-99	-99	-99	-99	-99	-99	-99	-99	-99	-99	-99	-99	-99	-99	-99	-99	-99	-99	-99	-99	-99	-99	-99	-99	-99	-99	-99	-99	-99	-99	-99	-99	-99	-99	-99	-99	-99	-99	-99	-99	-99	-99	-99
571	2	2	1	3	España	3	-99	-99	-99	-99	-99	-99	-99	-99	-99	-99	-99	-99	-99	-99	-99	-99	-99	-99	-99	-99	-99	-99	-99	-99	-99	-99	-99	-99	-99	-99	-99	-99	-99	-99	-99	-99	-99	-99	-99	-99	-99	-99	-99
283	1	3	2	1	Quito	2	0	0	215.415	0	6	1	4	2	2	6	6	6	6	6	1	1	4	1	7	7	1	2	1	1	6	7	7	6	7	7	3	5	5	3	0	0	315.493	0	3	1	2	2	2
388	2	1	2	3	Quito	2	-99	-99	-99	-99	-99	-99	-99	-99	-99	-99	-99	-99	-99	-99	-99	-99	-99	-99	-99	-99	-99	-99	-99	-99	-99	-99	-99	-99	-99	-99	-99	-99	-99	-99	-99	-99	-99	-99	-99	-99	-99	-99	-99
356	3	2	1	3	Quito	2	-99	-99	-99	-99	-99	-99	-99	-99	-99	-99	-99	-99	-99	-99	-99	-99	-99	-99	-99	-99	-99	-99	-99	-99	-99	-99	-99	-99	-99	-99	-99	-99	-99	-99	-99	-99	-99	-99	-99	-99	-99	-99	-99
293	2	1	2	3	Quito	2	-99	-99	-99	-99	-99	-99	-99	-99	-99	-99	-99	-99	-99	-99	-99	-99	-99	-99	-99	-99	-99	-99	-99	-99	-99	-99	-99	-99	-99	-99	-99	-99	-99	-99	-99	-99	-99	-99	-99	-99	-99	-99	-99
304	2	1	2	3	Quito	2	-99	-99	-99	-99	-99	-99	-99	-99	-99	-99	-99	-99	-99	-99	-99	-99	-99	-99	-99	-99	-99	-99	-99	-99	-99	-99	-99	-99	-99	-99	-99	-99	-99	-99	-99	-99	-99	-99	-99	-99	-99	-99	-99
175	2	1	3	2	Quito	2	-99	-99	-99	-99	-99	-99	-99	-99	-99	-99	-99	-99	-99	-99	-99	-99	-99	-99	-99	-99	-99	-99	-99	-99	-99	-99	-99	-99	-99	-99	-99	-99	-99	-99	-99	-99	-99	-99	-99	-99	-99	-99	-99
78	3	3	2	1	España	3	-99	-99	-99	-99	-99	-99	-99	-99	-99	-99	-99	-99	-99	-99	-99	-99	-99	-99	-99	-99	-99	-99	-99	-99	-99	-99	-99	-99	-99	-99	-99	-99	-99	-99	-99	-99	-99	-99	-99	-99	-99	-99	-99
80	2	3	1	2	España	3	-99	-99	-99	-99	-99	-99	-99	-99	-99	-99	-99	-99	-99	-99	-99	-99	-99	-99	-99	-99	-99	-99	-99	-99	-99	-99	-99	-99	-99	-99	-99	-99	-99	-99	-99	-99	-99	-99	-99	-99	-99	-99	-99
94	1	1	3	2	Gasteiz	1	0	0	86.61	0	5	6	3	3	4	5	5	4	4	5	3	2	3	6	5	4	5	2	4	5	6	6	7	5	3	5	3	3	3	2	0	0	156.665	0	5	5	4	4	4
216	3	2	3	1	España	3	-99	-99	-99	-99	-99	-99	-99	-99	-99	-99	-99	-99	-99	-99	-99	-99	-99	-99	-99	-99	-99	-99	-99	-99	-99	-99	-99	-99	-99	-99	-99	-99	-99	-99	-99	-99	-99	-99	-99	-99	-99	-99	-99
308	1	1	2	3	España	3	0	0	26.86	0	6	6	6	6	6	6	6	6	6	6	6	6	6	6	6	6	6	6	6	6	6	6	6	7	7	7	5	5	5	5	0	0	8.838	0	6	6	6	6	6
360	2	3	2	1	Quito	2	-99	-99	-99	-99	-99	-99	-99	-99	-99	-99	-99	-99	-99	-99	-99	-99	-99	-99	-99	-99	-99	-99	-99	-99	-99	-99	-99	-99	-99	-99	-99	-99	-99	-99	-99	-99	-99	-99	-99	-99	-99	-99	-99
397	1	3	2	1	Quito	2	0	0	220.781	0	2	4	2	2	2	2	2	2	2	2	2	2	2	2	2	2	2	2	2	2	2	7	7	4	4	4	4	1	1	1	0	0	265.879	0	7	6	7	7	7
474	3	1	3	2	España	3	-99	-99	-99	-99	-99	-99	-99	-99	-99	-99	-99	-99	-99	-99	-99	-99	-99	-99	-99	-99	-99	-99	-99	-99	-99	-99	-99	-99	-99	-99	-99	-99	-99	-99	-99	-99	-99	-99	-99	-99	-99	-99	-99
500	2	1	3	2	España	3	-99	-99	-99	-99	-99	-99	-99	-99	-99	-99	-99	-99	-99	-99	-99	-99	-99	-99	-99	-99	-99	-99	-99	-99	-99	-99	-99	-99	-99	-99	-99	-99	-99	-99	-99	-99	-99	-99	-99	-99	-99	-99	-99
507	2	3	2	1	España	3	-99	-99	-99	-99	-99	-99	-99	-99	-99	-99	-99	-99	-99	-99	-99	-99	-99	-99	-99	-99	-99	-99	-99	-99	-99	-99	-99	-99	-99	-99	-99	-99	-99	-99	-99	-99	-99	-99	-99	-99	-99	-99	-99
687	2	2	3	1	España	3	-99	-99	-99	-99	-99	-99	-99	-99	-99	-99	-99	-99	-99	-99	-99	-99	-99	-99	-99	-99	-99	-99	-99	-99	-99	-99	-99	-99	-99	-99	-99	-99	-99	-99	-99	-99	-99	-99	-99	-99	-99	-99	-99
689	3	1	2	3	España	3	-99	-99	-99	-99	-99	-99	-99	-99	-99	-99	-99	-99	-99	-99	-99	-99	-99	-99	-99	-99	-99	-99	-99	-99	-99	-99	-99	-99	-99	-99	-99	-99	-99	-99	-99	-99	-99	-99	-99	-99	-99	-99	-99
43	3	3	2	1	España	3	-99	-99	-99	-99	-99	-99	-99	-99	-99	-99	-99	-99	-99	-99	-99	-99	-99	-99	-99	-99	-99	-99	-99	-99	-99	-99	-99	-99	-99	-99	-99	-99	-99	-99	-99	-99	-99	-99	-99	-99	-99	-99	-99
102	1	3	1	2	España	3	0	0	220.166	0	1	1	3	3	1	1	3	2	1	4	1	1	1	1	4	4	1	1	4	3	4	4	5	4	4	5	2	3	2	1	7.081	10.876	282.476	3	8	1	5	6	4
295	2	3	1	2	Quito	2	-99	-99	-99	-99	-99	-99	-99	-99	-99	-99	-99	-99	-99	-99	-99	-99	-99	-99	-99	-99	-99	-99	-99	-99	-99	-99	-99	-99	-99	-99	-99	-99	-99	-99	-99	-99	-99	-99	-99	-99	-99	-99	-99
625	3	1	3	2	España	3	-99	-99	-99	-99	-99	-99	-99	-99	-99	-99	-99	-99	-99	-99	-99	-99	-99	-99	-99	-99	-99	-99	-99	-99	-99	-99	-99	-99	-99	-99	-99	-99	-99	-99	-99	-99	-99	-99	-99	-99	-99	-99	-99
647	1	3	2	1	España	3	0	0	1020.85	0	5	5	3	3	2	6	5	3	3	4	2	2	2	6	7	6	4	6	6	6	6	6	6	5	2	6	1	1	1	4	0	0	271.081	0	6	2	5	5	3
552	1	2	3	1	España	3	0	0	253.998	0	7	1	7	6	1	6	7	1	7	3	1	5	3	2	7	7	6	6	2	5	7	7	7	7	6	7	5	5	5	5	0	0	316.201	0	8	1	8	8	6
612	1	1	2	3	España	3	0	0	233.733	0	5	4	5	4	5	6	6	6	5	4	4	4	4	6	5	3	3	2	3	2	5	4	6	4	3	4	4	3	3	4	0	0	277.864	0	3	4	3	4	5
69	1	2	3	1	Gasteiz	1	0	0	212.914	0	3	5	1	1	2	2	3	3	3	2	2	2	2	2	1	1	2	6	2	2	2	6	6	6	5	5	4	4	3	4	0	0	284.113	0	7	1	5	4	3
59	1	1	2	3	Gasteiz	1	0	0	217.955	0	4	3	4	4	5	5	5	5	5	4	5	4	1	6	6	5	1	1	2	7	6	3	5	4	2	5	4	5	5	4	0	0	268.156	0	5	1	5	5	5
14	3	1	3	2	Gasteiz	1	-99	-99	-99	-99	-99	-99	-99	-99	-99	-99	-99	-99	-99	-99	-99	-99	-99	-99	-99	-99	-99	-99	-99	-99	-99	-99	-99	-99	-99	-99	-99	-99	-99	-99	-99	-99	-99	-99	-99	-99	-99	-99	-99
62	1	3	2	1	Gasteiz	1	0	0	221.021	0	7	1	6	7	7	7	7	5	6	5	7	7	7	7	6	7	7	5	4	7	7	7	7	4	3	3	4	3	5	5	0	0	262.631	0	5	2	5	5	6
7	1	3	1	2	Gasteiz	1	0	0	224.68	0	1	1	1	1	1	1	1	1	4	1	1	1	1	1	1	1	2	2	3	1	3	1	4	1	1	1	4	4	5	5	0	0	274.259	0	7	1	3	7	1
56	1	1	2	3	Gasteiz	1	11.558	11.558	220.761	1	1	3	3	2	1	1	1	1	1	3	1	1	1	1	5	3	1	3	2	5	5	4	5	6	4	6	5	5	3	4	0	0	269.714	0	1	1	4	5	1
323	1	2	3	1	Quito	2	0	0	214.341	0	4	6	5	7	4	4	4	4	6	5	4	4	4	4	7	5	7	2	7	7	7	7	7	5	6	7	5	5	5	5	0	0	146.8	0	7	1	6	4	3
158	3	2	1	3	España	3	-99	-99	-99	-99	-99	-99	-99	-99	-99	-99	-99	-99	-99	-99	-99	-99	-99	-99	-99	-99	-99	-99	-99	-99	-99	-99	-99	-99	-99	-99	-99	-99	-99	-99	-99	-99	-99	-99	-99	-99	-99	-99	-99
525	3	2	1	3	España	3	-99	-99	-99	-99	-99	-99	-99	-99	-99	-99	-99	-99	-99	-99	-99	-99	-99	-99	-99	-99	-99	-99	-99	-99	-99	-99	-99	-99	-99	-99	-99	-99	-99	-99	-99	-99	-99	-99	-99	-99	-99	-99	-99
36	1	2	3	1	España	3	253.518	254.2	256.122	5	5	4	5	4	4	4	4	4	3	3	3	4	3	2	5	5	2	2	2	3	4	4	7	7	7	6	4	5	5	5	0	0	278.049	0	8	1	8	8	8
233	2	2	3	1	Quito	2	-99	-99	-99	-99	-99	-99	-99	-99	-99	-99	-99	-99	-99	-99	-99	-99	-99	-99	-99	-99	-99	-99	-99	-99	-99	-99	-99	-99	-99	-99	-99	-99	-99	-99	-99	-99	-99	-99	-99	-99	-99	-99	-99
193	1	3	2	1	España	3	163.772	163.772	164.784	1	2	2	1	1	1	2	1	1	2	2	1	1	1	1	1	1	1	1	1	1	1	5	6	5	5	6	4	5	3	4	0	0	121.913	0	6	6	5	5	2
108	3	3	2	1	Gasteiz	1	-99	-99	-99	-99	-99	-99	-99	-99	-99	-99	-99	-99	-99	-99	-99	-99	-99	-99	-99	-99	-99	-99	-99	-99	-99	-99	-99	-99	-99	-99	-99	-99	-99	-99	-99	-99	-99	-99	-99	-99	-99	-99	-99
60	1	3	2	1	Gasteiz	1	226.115	226.602	227.525	2	4	6	4	3	1	3	4	2	4	4	3	2	4	4	4	5	5	2	5	5	5	5	6	3	4	4	3	4	5	5	0	0	268.317	0	7	1	7	7	1
522	3	1	3	2	España	3	-99	-99	-99	-99	-99	-99	-99	-99	-99	-99	-99	-99	-99	-99	-99	-99	-99	-99	-99	-99	-99	-99	-99	-99	-99	-99	-99	-99	-99	-99	-99	-99	-99	-99	-99	-99	-99	-99	-99	-99	-99	-99	-99
102	3	3	2	1	Gasteiz	1	-99	-99	-99	-99	-99	-99	-99	-99	-99	-99	-99	-99	-99	-99	-99	-99	-99	-99	-99	-99	-99	-99	-99	-99	-99	-99	-99	-99	-99	-99	-99	-99	-99	-99	-99	-99	-99	-99	-99	-99	-99	-99	-99
170	1	2	1	3	España	3	0	0	217.558	0	5	1	3	3	1	6	6	4	6	4	1	2	2	6	2	4	3	1	2	1	2	7	7	6	6	6	4	4	4	2	10.517	10.825	274.497	2	8	1	8	8	1
79	2	3	1	2	Gasteiz	1	-99	-99	-99	-99	-99	-99	-99	-99	-99	-99	-99	-99	-99	-99	-99	-99	-99	-99	-99	-99	-99	-99	-99	-99	-99	-99	-99	-99	-99	-99	-99	-99	-99	-99	-99	-99	-99	-99	-99	-99	-99	-99	-99
434	1	1	3	2	España	3	0	0	1579.03	0	6	1	5	5	6	6	6	6	5	6	2	2	2	6	5	5	5	5	5	5	6	5	5	6	3	6	5	5	4	3	0	0	505.826	0	6	2	6	6	3
477	1	3	2	1	España	3	0	0	220.653	0	7	1	7	6	6	7	7	7	7	3	3	4	5	7	7	7	5	7	7	6	7	5	7	7	4	7	5	5	5	5	0	0	268.653	0	8	1	8	8	3
611	2	1	2	3	España	3	-99	-99	-99	-99	-99	-99	-99	-99	-99	-99	-99	-99	-99	-99	-99	-99	-99	-99	-99	-99	-99	-99	-99	-99	-99	-99	-99	-99	-99	-99	-99	-99	-99	-99	-99	-99	-99	-99	-99	-99	-99	-99	-99
429	2	2	3	1	España	3	-99	-99	-99	-99	-99	-99	-99	-99	-99	-99	-99	-99	-99	-99	-99	-99	-99	-99	-99	-99	-99	-99	-99	-99	-99	-99	-99	-99	-99	-99	-99	-99	-99	-99	-99	-99	-99	-99	-99	-99	-99	-99	-99
23	1	3	1	2	España	3	224.036	224.054	225.442	2	4	4	4	3	3	4	4	4	3	5	4	4	4	5	5	5	5	4	4	5	4	5	6	3	3	3	4	5	5	3	0	0	278.995	0	6	2	6	6	2
407	1	3	2	1	Quito	2	91.244	91.244	92.101	1	3	6	4	4	4	3	2	3	3	4	2	3	1	3	5	7	3	2	3	4	5	5	6	6	6	7	3	4	5	4	14.602	14.602	162.451	1	5	3	5	3	3
296	2	1	3	2	España	3	-99	-99	-99	-99	-99	-99	-99	-99	-99	-99	-99	-99	-99	-99	-99	-99	-99	-99	-99	-99	-99	-99	-99	-99	-99	-99	-99	-99	-99	-99	-99	-99	-99	-99	-99	-99	-99	-99	-99	-99	-99	-99	-99
294	2	2	3	1	Quito	2	-99	-99	-99	-99	-99	-99	-99	-99	-99	-99	-99	-99	-99	-99	-99	-99	-99	-99	-99	-99	-99	-99	-99	-99	-99	-99	-99	-99	-99	-99	-99	-99	-99	-99	-99	-99	-99	-99	-99	-99	-99	-99	-99
468	1	2	3	1	España	3	107.461	220.659	220.758	2	7	1	4	3	1	3	4	2	1	3	1	1	1	1	1	1	3	1	1	4	3	4	4	3	3	3	4	4	4	4	274.531	274.531	274.63	1	4	3	8	8	4
225	3	3	1	2	España	3	-99	-99	-99	-99	-99	-99	-99	-99	-99	-99	-99	-99	-99	-99	-99	-99	-99	-99	-99	-99	-99	-99	-99	-99	-99	-99	-99	-99	-99	-99	-99	-99	-99	-99	-99	-99	-99	-99	-99	-99	-99	-99	-99
95	1	2	3	1	España	3	0	0	237.092	0	7	6	5	3	7	6	7	5	4	4	2	6	5	7	7	5	3	1	2	7	7	6	7	2	7	3	4	4	4	4	0	0	272.962	0	6	6	8	6	2
536	2	3	2	1	España	3	-99	-99	-99	-99	-99	-99	-99	-99	-99	-99	-99	-99	-99	-99	-99	-99	-99	-99	-99	-99	-99	-99	-99	-99	-99	-99	-99	-99	-99	-99	-99	-99	-99	-99	-99	-99	-99	-99	-99	-99	-99	-99	-99
361	1	1	2	3	Quito	2	0	0	221.185	0	7	1	6	5	3	7	7	4	7	7	2	2	2	4	7	7	5	7	7	7	7	7	7	7	4	5	3	4	5	3	0	0	278.126	0	5	2	4	4	1
119	2	2	3	1	España	3	-99	-99	-99	-99	-99	-99	-99	-99	-99	-99	-99	-99	-99	-99	-99	-99	-99	-99	-99	-99	-99	-99	-99	-99	-99	-99	-99	-99	-99	-99	-99	-99	-99	-99	-99	-99	-99	-99	-99	-99	-99	-99	-99
77	1	1	2	3	España	3	0	0	234.832	0	4	5	2	2	4	5	5	5	6	3	5	6	6	7	6	5	2	2	2	3	6	6	7	6	2	5	5	5	3	4	0	0	271.921	0	8	6	6	6	2
286	1	3	1	2	Quito	2	13.231	163.518	206.995	9	6	4	3	1	6	6	7	5	6	7	5	6	6	4	6	7	3	3	4	5	5	6	6	6	5	5	3	2	3	3	30.713	443.62	452.866	9	5	2	5	6	3
221	3	3	2	1	Quito	2	-99	-99	-99	-99	-99	-99	-99	-99	-99	-99	-99	-99	-99	-99	-99	-99	-99	-99	-99	-99	-99	-99	-99	-99	-99	-99	-99	-99	-99	-99	-99	-99	-99	-99	-99	-99	-99	-99	-99	-99	-99	-99	-99
147	1	3	2	1	Quito	2	0	0	183.932	0	1	1	1	1	1	1	1	1	1	1	1	1	1	1	1	1	1	1	2	1	1	3	3	1	2	1	1	1	4	1	0	0	179.384	0	2	1	2	2	2
603	1	3	2	1	España	3	5.58	5.58	360.242	1	7	7	7	7	7	7	7	7	7	7	7	7	7	7	7	6	6	6	6	7	7	7	7	7	7	7	5	5	5	5	0	0	289.924	0	8	8	8	8	8
253	2	1	3	2	España	3	-99	-99	-99	-99	-99	-99	-99	-99	-99	-99	-99	-99	-99	-99	-99	-99	-99	-99	-99	-99	-99	-99	-99	-99	-99	-99	-99	-99	-99	-99	-99	-99	-99	-99	-99	-99	-99	-99	-99	-99	-99	-99	-99
16	1	1	2	3	España	3	0	0	222.077	0	4	5	2	2	3	5	5	5	5	6	3	6	5	2	7	5	7	1	4	4	7	6	7	4	3	4	4	5	5	3	0	0	269.99	0	8	1	6	6	2
362	1	2	3	1	España	3	231.375	231.763	233.216	4	7	1	6	5	4	6	6	5	5	4	1	3	1	6	6	5	4	2	4	4	5	6	6	4	2	5	3	4	4	4	0	0	292.464	0	6	2	8	8	1
112	3	3	1	2	España	3	-99	-99	-99	-99	-99	-99	-99	-99	-99	-99	-99	-99	-99	-99	-99	-99	-99	-99	-99	-99	-99	-99	-99	-99	-99	-99	-99	-99	-99	-99	-99	-99	-99	-99	-99	-99	-99	-99	-99	-99	-99	-99	-99
497	1	2	1	3	España	3	0	0	220.146	0	5	3	3	3	5	4	4	5	5	5	4	4	4	5	5	5	6	4	5	4	6	5	3	7	6	6	3	5	5	5	0	0	7.563	0	3	2	3	6	6
210	2	1	2	3	Quito	2	-99	-99	-99	-99	-99	-99	-99	-99	-99	-99	-99	-99	-99	-99	-99	-99	-99	-99	-99	-99	-99	-99	-99	-99	-99	-99	-99	-99	-99	-99	-99	-99	-99	-99	-99	-99	-99	-99	-99	-99	-99	-99	-99
531	3	2	1	3	España	3	-99	-99	-99	-99	-99	-99	-99	-99	-99	-99	-99	-99	-99	-99	-99	-99	-99	-99	-99	-99	-99	-99	-99	-99	-99	-99	-99	-99	-99	-99	-99	-99	-99	-99	-99	-99	-99	-99	-99	-99	-99	-99	-99
446	1	2	3	1	España	3	214.185	420.434	422.236	4	4	1	4	1	1	5	5	4	2	5	1	1	1	3	5	4	3	1	5	4	4	5	7	6	1	6	3	4	2	3	0	0	272.788	0	8	1	6	6	1
209	3	1	2	3	Quito	2	-99	-99	-99	-99	-99	-99	-99	-99	-99	-99	-99	-99	-99	-99	-99	-99	-99	-99	-99	-99	-99	-99	-99	-99	-99	-99	-99	-99	-99	-99	-99	-99	-99	-99	-99	-99	-99	-99	-99	-99	-99	-99	-99
277	1	2	3	1	España	3	5.031	52.489	221.805	2	5	1	4	1	1	6	6	4	5	3	1	4	4	3	5	5	2	1	1	1	1	4	5	4	4	6	5	5	5	3	0	0	273.055	0	8	5	8	8	4
118	2	3	2	1	Gasteiz	1	-99	-99	-99	-99	-99	-99	-99	-99	-99	-99	-99	-99	-99	-99	-99	-99	-99	-99	-99	-99	-99	-99	-99	-99	-99	-99	-99	-99	-99	-99	-99	-99	-99	-99	-99	-99	-99	-99	-99	-99	-99	-99	-99
177	3	1	3	2	Quito	2	-99	-99	-99	-99	-99	-99	-99	-99	-99	-99	-99	-99	-99	-99	-99	-99	-99	-99	-99	-99	-99	-99	-99	-99	-99	-99	-99	-99	-99	-99	-99	-99	-99	-99	-99	-99	-99	-99	-99	-99	-99	-99	-99
509	1	2	3	1	España	3	216.477	216.477	217.423	1	7	6	7	6	6	7	7	7	7	7	6	6	5	7	7	7	6	6	5	6	7	7	7	7	6	7	3	5	5	4	0	0	271.758	0	8	6	8	6	8
343	2	1	2	3	España	3	-99	-99	-99	-99	-99	-99	-99	-99	-99	-99	-99	-99	-99	-99	-99	-99	-99	-99	-99	-99	-99	-99	-99	-99	-99	-99	-99	-99	-99	-99	-99	-99	-99	-99	-99	-99	-99	-99	-99	-99	-99	-99	-99
364	3	3	1	2	Quito	2	-99	-99	-99	-99	-99	-99	-99	-99	-99	-99	-99	-99	-99	-99	-99	-99	-99	-99	-99	-99	-99	-99	-99	-99	-99	-99	-99	-99	-99	-99	-99	-99	-99	-99	-99	-99	-99	-99	-99	-99	-99	-99	-99
355	2	3	2	1	Quito	2	-99	-99	-99	-99	-99	-99	-99	-99	-99	-99	-99	-99	-99	-99	-99	-99	-99	-99	-99	-99	-99	-99	-99	-99	-99	-99	-99	-99	-99	-99	-99	-99	-99	-99	-99	-99	-99	-99	-99	-99	-99	-99	-99
148	3	2	1	3	Quito	2	-99	-99	-99	-99	-99	-99	-99	-99	-99	-99	-99	-99	-99	-99	-99	-99	-99	-99	-99	-99	-99	-99	-99	-99	-99	-99	-99	-99	-99	-99	-99	-99	-99	-99	-99	-99	-99	-99	-99	-99	-99	-99	-99
34	1	2	3	1	Gasteiz	1	0	0	225.467	0	5	7	4	5	2	2	5	4	2	4	4	5	4	6	7	6	4	6	5	4	5	3	6	5	5	6	4	4	4	3	0	0	5.461	0	5	1	4	4	3
225	2	2	3	1	Quito	2	-99	-99	-99	-99	-99	-99	-99	-99	-99	-99	-99	-99	-99	-99	-99	-99	-99	-99	-99	-99	-99	-99	-99	-99	-99	-99	-99	-99	-99	-99	-99	-99	-99	-99	-99	-99	-99	-99	-99	-99	-99	-99	-99
301	1	2	1	3	Quito	2	0	0	217.927	0	5	1	5	3	3	7	7	7	4	4	6	6	1	1	7	7	2	2	2	7	1	7	7	6	7	7	3	4	2	2	78.817	333.74	334.13	2	5	4	1	6	1
206	1	3	1	2	Quito	2	0	0	215.431	0	2	3	2	1	1	2	3	1	1	1	1	2	1	3	2	2	1	2	2	1	4	1	6	4	4	7	4	5	4	3	90.362	90.362	408.557	1	5	1	5	7	4
391	1	3	1	2	España	3	0	0	228.13	0	5	1	4	3	1	6	4	3	6	4	1	4	1	6	6	4	4	1	1	6	6	6	5	6	4	6	3	5	4	4	0	0	275.917	0	4	1	5	3	2
248	1	3	2	1	Quito	2	218.568	218.568	219.451	1	7	6	7	3	1	3	3	3	3	7	5	3	4	6	7	7	7	3	4	7	7	7	7	7	6	7	2	3	2	2	0	0	131.41	0	7	6	3	3	3
379	1	1	2	3	Quito	2	33.736	35.43	257.085	2	3	1	2	3	1	2	4	2	2	3	2	3	6	2	6	3	4	5	4	2	5	2	2	7	7	7	1	3	3	3	0	0	277.638	0	7	1	4	5	4
465	3	1	3	2	España	3	-99	-99	-99	-99	-99	-99	-99	-99	-99	-99	-99	-99	-99	-99	-99	-99	-99	-99	-99	-99	-99	-99	-99	-99	-99	-99	-99	-99	-99	-99	-99	-99	-99	-99	-99	-99	-99	-99	-99	-99	-99	-99	-99
422	1	2	1	3	España	3	0	0	223.101	0	5	2	4	5	4	5	7	7	1	4	2	4	2	7	6	4	3	3	1	2	5	6	6	3	3	4	3	4	5	5	0	0	297.651	0	3	1	3	3	2
223	3	1	3	2	España	3	-99	-99	-99	-99	-99	-99	-99	-99	-99	-99	-99	-99	-99	-99	-99	-99	-99	-99	-99	-99	-99	-99	-99	-99	-99	-99	-99	-99	-99	-99	-99	-99	-99	-99	-99	-99	-99	-99	-99	-99	-99	-99	-99
240	3	3	2	1	Quito	2	-99	-99	-99	-99	-99	-99	-99	-99	-99	-99	-99	-99	-99	-99	-99	-99	-99	-99	-99	-99	-99	-99	-99	-99	-99	-99	-99	-99	-99	-99	-99	-99	-99	-99	-99	-99	-99	-99	-99	-99	-99	-99	-99
160	2	1	3	2	España	3	-99	-99	-99	-99	-99	-99	-99	-99	-99	-99	-99	-99	-99	-99	-99	-99	-99	-99	-99	-99	-99	-99	-99	-99	-99	-99	-99	-99	-99	-99	-99	-99	-99	-99	-99	-99	-99	-99	-99	-99	-99	-99	-99
159	1	3	1	2	España	3	228.881	229.2	230.398	4	6	6	7	7	3	7	7	7	7	7	3	4	4	6	6	6	7	5	7	7	7	7	7	7	6	7	5	5	4	5	0	0	294.395	0	6	6	8	6	3
183	3	3	2	1	España	3	-99	-99	-99	-99	-99	-99	-99	-99	-99	-99	-99	-99	-99	-99	-99	-99	-99	-99	-99	-99	-99	-99	-99	-99	-99	-99	-99	-99	-99	-99	-99	-99	-99	-99	-99	-99	-99	-99	-99	-99	-99	-99	-99
484	1	1	3	2	España	3	0	0	220.096	0	7	1	7	2	2	7	7	7	4	4	1	1	1	1	7	7	2	7	4	7	7	7	7	7	7	7	5	5	5	5	0	0	48.038	0	8	8	8	8	8
64	1	2	1	3	España	3	380.026	380.026	382.444	1	7	6	7	6	7	6	6	6	6	5	7	6	3	7	6	6	6	6	6	6	6	3	6	5	5	5	4	4	4	4	0	0	325.781	0	4	5	5	5	4
95	1	1	3	2	Gasteiz	1	0	0	234.735	0	7	7	4	3	7	7	7	7	7	7	7	7	7	6	6	7	7	6	7	5	6	5	5	6	6	7	4	5	5	4	0	0	265.956	0	7	7	6	6	5
58	3	1	2	3	Gasteiz	1	-99	-99	-99	-99	-99	-99	-99	-99	-99	-99	-99	-99	-99	-99	-99	-99	-99	-99	-99	-99	-99	-99	-99	-99	-99	-99	-99	-99	-99	-99	-99	-99	-99	-99	-99	-99	-99	-99	-99	-99	-99	-99	-99
150	2	1	2	3	Quito	2	-99	-99	-99	-99	-99	-99	-99	-99	-99	-99	-99	-99	-99	-99	-99	-99	-99	-99	-99	-99	-99	-99	-99	-99	-99	-99	-99	-99	-99	-99	-99	-99	-99	-99	-99	-99	-99	-99	-99	-99	-99	-99	-99
62	1	2	1	3	España	3	217.557	217.557	218.832	1	3	3	2	2	4	4	4	4	4	2	4	2	2	3	5	4	4	3	3	3	6	5	5	5	3	6	3	4	3	4	0	0	280.122	0	5	2	6	5	5
249	3	1	3	2	Quito	2	-99	-99	-99	-99	-99	-99	-99	-99	-99	-99	-99	-99	-99	-99	-99	-99	-99	-99	-99	-99	-99	-99	-99	-99	-99	-99	-99	-99	-99	-99	-99	-99	-99	-99	-99	-99	-99	-99	-99	-99	-99	-99	-99
440	3	1	2	3	España	3	-99	-99	-99	-99	-99	-99	-99	-99	-99	-99	-99	-99	-99	-99	-99	-99	-99	-99	-99	-99	-99	-99	-99	-99	-99	-99	-99	-99	-99	-99	-99	-99	-99	-99	-99	-99	-99	-99	-99	-99	-99	-99	-99
280	3	3	1	2	Quito	2	-99	-99	-99	-99	-99	-99	-99	-99	-99	-99	-99	-99	-99	-99	-99	-99	-99	-99	-99	-99	-99	-99	-99	-99	-99	-99	-99	-99	-99	-99	-99	-99	-99	-99	-99	-99	-99	-99	-99	-99	-99	-99	-99
171	1	2	1	3	Quito	2	0	0	215.498	0	5	2	5	5	6	5	6	6	6	7	6	5	4	5	7	6	7	6	6	6	7	6	6	6	6	7	1	2	3	4	0	0	266.458	0	7	2	7	7	5
345	1	3	1	2	España	3	0	0	220.857	0	6	5	6	5	6	6	6	6	6	6	5	5	5	5	6	6	6	5	6	7	6	7	7	6	6	7	4	5	5	5	0	0	275.107	0	8	8	8	6	3
295	1	3	2	1	España	3	0	0	222.155	0	4	4	3	3	3	3	3	3	3	3	3	2	2	2	2	3	3	2	2	2	2	2	7	4	4	4	4	4	4	4	0	0	271.979	0	6	1	8	8	8
208	1	1	2	3	España	3	0	0	4.646	0	6	6	6	6	6	6	6	6	6	6	6	6	5	7	7	7	7	7	7	6	6	6	6	6	7	7	4	4	4	4	0	0	1.958	0	8	8	8	8	6
683	1	1	2	3	España	3	0	0	228.184	0	4	1	3	1	1	1	2	3	1	4	1	2	1	1	3	4	2	1	1	1	2	1	7	4	5	6	2	4	4	4	0	0	266.188	0	4	1	3	3	1
180	3	1	2	3	España	3	-99	-99	-99	-99	-99	-99	-99	-99	-99	-99	-99	-99	-99	-99	-99	-99	-99	-99	-99	-99	-99	-99	-99	-99	-99	-99	-99	-99	-99	-99	-99	-99	-99	-99	-99	-99	-99	-99	-99	-99	-99	-99	-99
353	3	1	2	3	Quito	2	-99	-99	-99	-99	-99	-99	-99	-99	-99	-99	-99	-99	-99	-99	-99	-99	-99	-99	-99	-99	-99	-99	-99	-99	-99	-99	-99	-99	-99	-99	-99	-99	-99	-99	-99	-99	-99	-99	-99	-99	-99	-99	-99
32	3	3	2	1	España	3	-99	-99	-99	-99	-99	-99	-99	-99	-99	-99	-99	-99	-99	-99	-99	-99	-99	-99	-99	-99	-99	-99	-99	-99	-99	-99	-99	-99	-99	-99	-99	-99	-99	-99	-99	-99	-99	-99	-99	-99	-99	-99	-99
137	1	2	1	3	España	3	221.086	221.086	223.193	1	5	1	5	2	2	6	6	6	7	2	1	2	2	6	6	3	5	6	6	6	2	5	5	7	6	7	5	5	4	5	0	0	271.856	0	8	1	8	6	1
310	3	1	2	3	Quito	2	-99	-99	-99	-99	-99	-99	-99	-99	-99	-99	-99	-99	-99	-99	-99	-99	-99	-99	-99	-99	-99	-99	-99	-99	-99	-99	-99	-99	-99	-99	-99	-99	-99	-99	-99	-99	-99	-99	-99	-99	-99	-99	-99
19	2	1	2	3	España	3	-99	-99	-99	-99	-99	-99	-99	-99	-99	-99	-99	-99	-99	-99	-99	-99	-99	-99	-99	-99	-99	-99	-99	-99	-99	-99	-99	-99	-99	-99	-99	-99	-99	-99	-99	-99	-99	-99	-99	-99	-99	-99	-99
366	3	2	1	3	Quito	2	-99	-99	-99	-99	-99	-99	-99	-99	-99	-99	-99	-99	-99	-99	-99	-99	-99	-99	-99	-99	-99	-99	-99	-99	-99	-99	-99	-99	-99	-99	-99	-99	-99	-99	-99	-99	-99	-99	-99	-99	-99	-99	-99
[truncated: 477 more columns]
